# Supplementary material for: Innate immune pathway activated mesenchymal stromal cells improve function and histologic outcomes in a rodent osteoarthritis model
Source: Front Bioeng Biotechnol. 2025 May 22;13:1525969. doi: 10.3389/fbioe.2025.1525969 (PMC12138259; doi:10.3389/fbioe.2025.1525969)
Supplement: Supplementary file 1 [file Table2.xlsx]

## Sheet: gsea_TLRvsMSC
NAME	SIZE	NES	NOM p-val	FDR q-val
REACTOME_IMMUNOREGULATORY_INTERACTIONS_BETWEEN_A_LYMPHOID_AND_A_NON_LYMPHOID_CELL	83	-2.62743	0	0
HALLMARK_TNFA_SIGNALING_VIA_NFKB	188	-2.55711	0	0
REACTOME_ANTIMICROBIAL_PEPTIDES	22	-2.26462	0	0.000408
REACTOME_MRNA_SPLICING	198	-2.23804	0	0.000306
REACTOME_NONSENSE_MEDIATED_DECAY_NMD_INDEPENDENT_OF_THE_EXON_JUNCTION_COMPLEX_EJC	94	-2.21278	0	0.000495
REACTOME_PHOSPHORYLATION_OF_CD3_AND_TCR_ZETA_CHAINS	15	-2.20622	0	0.000622
REACTOME_NONSENSE_MEDIATED_DECAY_NMD	114	-2.19411	0	0.000533
REACTOME_GENERATION_OF_SECOND_MESSENGER_MOLECULES	23	-2.16324	0	0.00153778
REACTOME_EUKARYOTIC_TRANSLATION_INITIATION	119	-2.08207	0	0.00485256
REACTOME_PROCESSING_OF_CAPPED_INTRON_CONTAINING_PRE_MRNA	263	-2.07333	0	0.00510867
REACTOME_PD_1_SIGNALING	16	-2.04958	0	0.0065809
REACTOME_RESPIRATORY_ELECTRON_TRANSPORT	86	-2.04716	0	0.0061415
REACTOME_RESPIRATORY_ELECTRON_TRANSPORT_ATP_SYNTHESIS_BY_CHEMIOSMOTIC_COUPLING_AND_HEAT_PRODUCTION_BY_UNCOUPLING_PROTEINS	106	-2.04221	0	0.00586096
REACTOME_NEUTROPHIL_DEGRANULATION	464	-2.02186	0	0.00685171
HALLMARK_ALLOGRAFT_REJECTION	177	-2.01964	0	0.00664348
REACTOME_COMPLEX_I_BIOGENESIS	50	-1.97057	0	0.0121784
HALLMARK_MYC_TARGETS_V1	192	-1.91719	0	0.022942
HALLMARK_INFLAMMATORY_RESPONSE	180	-1.90597	0	0.0246215
REACTOME_TRANSLATION	226	-1.9055	0	0.0235276
REACTOME_DAP12_INTERACTIONS	49	-1.89236	0	0.0262012
REACTOME_ONCOGENE_INDUCED_SENESCENCE	17	-1.85449	0.00576923	0.0361086
REACTOME_RNA_POLYMERASE_II_TRANSCRIPTION_TERMINATION	61	-1.83107	0	0.0442007
REACTOME_CELL_SURFACE_INTERACTIONS_AT_THE_VASCULAR_WALL	86	-1.82421	0	0.045041
REACTOME_FORMATION_OF_ATP_BY_CHEMIOSMOTIC_COUPLING	15	-1.80815	0.00610998	0.049473
REACTOME_TCR_SIGNALING	105	-1.79097	0	0.0566197
REACTOME_FORMATION_OF_FIBRIN_CLOT_CLOTTING_CASCADE	27	-1.76708	0.00801603	0.0680252
HALLMARK_E2F_TARGETS	199	-1.76577	0	0.0666576
REACTOME_REGULATION_OF_MRNA_STABILITY_BY_PROTEINS_THAT_BIND_AU_RICH_ELEMENTS	83	-1.76144	0	0.0668302
REACTOME_NEGATIVE_REGULATION_OF_FLT3	15	-1.75969	0.00829876	0.0656766
REACTOME_PROCESSING_OF_CAPPED_INTRONLESS_PRE_MRNA	28	-1.74211	0.00655022	0.0757471
REACTOME_SMOOTH_MUSCLE_CONTRACTION	31	-1.73347	0.00423729	0.0799858
REACTOME_ER_PHAGOSOME_PATHWAY	21	-1.73069	0.0131579	0.079544
REACTOME_DDX58_IFIH1_MEDIATED_INDUCTION_OF_INTERFERON_ALPHA_BETA	33	-1.72774	0.00625	0.0787701
REACTOME_CLASS_A_1_RHODOPSIN_LIKE_RECEPTORS	185	-1.7216	0	0.0801057
HALLMARK_IL6_JAK_STAT3_SIGNALING	80	-1.72058	0	0.0785752
REACTOME_ANTIGEN_ACTIVATES_B_CELL_RECEPTOR_BCR_LEADING_TO_GENERATION_OF_SECOND_MESSENGERS	24	-1.70287	0.0083682	0.0908717
HALLMARK_INTERFERON_GAMMA_RESPONSE	180	-1.70138	0	0.0896045
REACTOME_ACTIVATION_OF_THE_MRNA_UPON_BINDING_OF_THE_CAP_BINDING_COMPLEX_AND_EIFS_AND_SUBSEQUENT_BINDING_TO_43S	60	-1.69301	0	0.0939511
BIOCARTA_CSK_PATHWAY	16	-1.67446	0.0160321	0.107642
BIOCARTA_TNFR2_PATHWAY	17	-1.67096	0.0150215	0.109009
REACTOME_DOWNSTREAM_TCR_SIGNALING	87	-1.66362	0	0.112551
REACTOME_GPCR_LIGAND_BINDING	225	-1.6556	0	0.117526
REACTOME_SIGNALING_BY_THE_B_CELL_RECEPTOR_BCR	103	-1.65166	0.00206612	0.118851
REACTOME_GAP_FILLING_DNA_REPAIR_SYNTHESIS_AND_LIGATION_IN_GG_NER	22	-1.64903	0.00205761	0.118787
REACTOME_OXIDATIVE_STRESS_INDUCED_SENESCENCE	37	-1.64847	0.0125261	0.116675
REACTOME_MRNA_SPLICING_MINOR_PATHWAY	47	-1.64519	0.00426439	0.11717
REACTOME_ACTIVATION_OF_NF_KAPPAB_IN_B_CELLS	64	-1.64372	0.0040404	0.115989
REACTOME_REGULATED_NECROSIS	53	-1.63877	0.0043573	0.118185
REACTOME_ROS_AND_RNS_PRODUCTION_IN_PHAGOCYTES	33	-1.63482	0.0172043	0.119309
REACTOME_RHO_GTPASES_ACTIVATE_NADPH_OXIDASES	20	-1.63355	0.0170576	0.11836
REACTOME_THE_CITRIC_ACID_TCA_CYCLE_AND_RESPIRATORY_ELECTRON_TRANSPORT	152	-1.62387	0.0020284	0.126573
BIOCARTA_IL1R_PATHWAY	29	-1.62301	0.00779727	0.124854
REACTOME_PROCESSING_OF_INTRONLESS_PRE_MRNAS	20	-1.61951	0.0211864	0.125782
BIOCARTA_KERATINOCYTE_PATHWAY	46	-1.6177	0.00808081	0.125433
REACTOME_P75NTR_SIGNALS_VIA_NF_KB	17	-1.61106	0.0154143	0.13048
REACTOME_POLYMERASE_SWITCHING_ON_THE_C_STRAND_OF_THE_TELOMERE	24	-1.60427	0.0222672	0.134893
REACTOME_DEADENYLATION_DEPENDENT_MRNA_DECAY	49	-1.58402	0.0118343	0.155923
REACTOME_CHROMOSOME_MAINTENANCE	98	-1.58348	0.00214592	0.154093
REACTOME_MAJOR_PATHWAY_OF_RRNA_PROCESSING_IN_THE_NUCLEOLUS_AND_CYTOSOL	176	-1.57849	0.00398406	0.157316
REACTOME_NEUROTRANSMITTER_RELEASE_CYCLE	35	-1.57684	0.0160966	0.156689
BIOCARTA_CDMAC_PATHWAY	15	-1.5739	0.0332594	0.157702
REACTOME_INTRINSIC_PATHWAY_FOR_APOPTOSIS	39	-1.57096	0.0169133	0.158653
REACTOME_TNF_RECEPTOR_SUPERFAMILY_TNFSF_MEMBERS_MEDIATING_NON_CANONICAL_NF_KB_PATHWAY	16	-1.57022	0.0376238	0.157038
REACTOME_AUF1_HNRNP_D0_BINDS_AND_DESTABILIZES_MRNA	55	-1.56692	0.00994036	0.158454
BIOCARTA_NKCELLS_PATHWAY	17	-1.55911	0.0347648	0.164715
REACTOME_GPVI_MEDIATED_ACTIVATION_CASCADE	34	-1.55036	0.0211864	0.172679
BIOCARTA_RELA_PATHWAY	15	-1.54609	0.0430528	0.175273
REACTOME_TELOMERE_MAINTENANCE	47	-1.54517	0.0270793	0.173784
REACTOME_PCNA_DEPENDENT_LONG_PATCH_BASE_EXCISION_REPAIR	20	-1.54513	0.026694	0.171284
REACTOME_NUCLEOTIDE_BINDING_DOMAIN_LEUCINE_RICH_REPEAT_CONTAINING_RECEPTOR_NLR_SIGNALING_PATHWAYS	46	-1.54373	0.0140845	0.17049
BIOCARTA_NFKB_PATHWAY	21	-1.54005	0.0363248	0.172424
BIOCARTA_PML_PATHWAY	17	-1.537	0.043659	0.173561
REACTOME_INACTIVATION_OF_CSF3_G_CSF_SIGNALING	18	-1.53016	0.0258065	0.180051
REACTOME_ORC1_REMOVAL_FROM_CHROMATIN	69	-1.52581	0.00386847	0.183167
REACTOME_ACTIVATION_OF_THE_PRE_REPLICATIVE_COMPLEX	31	-1.52016	0.0285132	0.188513
HALLMARK_REACTIVE_OXIGEN_SPECIES_PATHWAY	48	-1.51865	0.0211946	0.18799
HALLMARK_DNA_REPAIR	145	-1.51829	0.00406504	0.186087
HALLMARK_INTERFERON_ALPHA_RESPONSE	91	-1.51405	0.0133843	0.189261
REACTOME_FCERI_MEDIATED_MAPK_ACTIVATION	30	-1.50816	0.0224033	0.195515
HALLMARK_HYPOXIA	189	-1.50537	0.00191939	0.197237
REACTOME_INTRINSIC_PATHWAY_OF_FIBRIN_CLOT_FORMATION	16	-1.50426	0.0567515	0.196317
REACTOME_ACTIVATION_OF_ATR_IN_RESPONSE_TO_REPLICATION_STRESS	35	-1.50264	0.0270793	0.196368
HALLMARK_UNFOLDED_PROTEIN_RESPONSE	108	-1.50127	0.00792079	0.195889
REACTOME_RIPK1_MEDIATED_REGULATED_NECROSIS	32	-1.50077	0.03	0.194285
BIOCARTA_HIVNEF_PATHWAY	54	-1.49977	0.00992064	0.193369
REACTOME_ACTIVATION_OF_BH3_ONLY_PROTEINS	18	-1.49687	0.0482897	0.194984
REACTOME_G_ALPHA_I_SIGNALLING_EVENTS	183	-1.49433	0.00198413	0.196439
REACTOME_ANTIGEN_PROCESSING_CROSS_PRESENTATION	75	-1.49123	0.0117647	0.198159
REACTOME_DOPAMINE_NEUROTRANSMITTER_RELEASE_CYCLE	18	-1.47915	0.0559284	0.21302
REACTOME_PLATELET_AGGREGATION_PLUG_FORMATION	32	-1.47461	0.0483559	0.217258
REACTOME_RESPONSE_TO_ELEVATED_PLATELET_CYTOSOLIC_CA2	114	-1.47283	0.00978474	0.217093
REACTOME_MAPK6_MAPK4_SIGNALING	73	-1.47014	0.0274262	0.218953
REACTOME_TELOMERE_C_STRAND_LAGGING_STRAND_SYNTHESIS	31	-1.46404	0.0509165	0.225444
BIOCARTA_CCR5_PATHWAY	16	-1.46002	0.0797414	0.229465
REACTOME_DETOXIFICATION_OF_REACTIVE_OXYGEN_SPECIES	31	-1.45843	0.0512821	0.229351
REACTOME_SIGNALING_BY_INTERLEUKINS	250	-1.45792	0.0102669	0.227707
HALLMARK_OXIDATIVE_PHOSPHORYLATION	195	-1.4578	0.00399202	0.225553
REACTOME_HEDGEHOG_LIGAND_BIOGENESIS	60	-1.4574	0.0310078	0.223711
REACTOME_C_TYPE_LECTIN_RECEPTORS_CLRS	110	-1.45269	0.0120724	0.228133
REACTOME_UBIQUITIN_MEDIATED_DEGRADATION_OF_PHOSPHORYLATED_CDC25A	51	-1.45231	0.0430328	0.226344
REACTOME_MITOCHONDRIAL_BIOGENESIS	26	-1.45161	0.0477137	0.225404
BIOCARTA_BAD_PATHWAY	23	-1.45031	0.0668058	0.224911
REACTOME_LAGGING_STRAND_SYNTHESIS	19	-1.44782	0.0574468	0.226663
REACTOME_PRC2_METHYLATES_HISTONES_AND_DNA	48	-1.44698	0.0352697	0.225622
REACTOME_GLUTAMATE_NEUROTRANSMITTER_RELEASE_CYCLE	16	-1.43958	0.0845361	0.234563
REACTOME_MITOCHONDRIAL_TRANSLATION	88	-1.43814	0.0139442	0.234463
HALLMARK_UV_RESPONSE_UP	146	-1.43768	0.0125	0.233008
REACTOME_PROTEIN_HYDROXYLATION	17	-1.43725	0.0786749	0.231519
REACTOME_RECOGNITION_OF_DNA_DAMAGE_BY_PCNA_CONTAINING_REPLICATION_COMPLEX	30	-1.43404	0.06639	0.234028
REACTOME_DNA_REPLICATION	124	-1.43106	0.00811359	0.236199
BIOCARTA_NKT_PATHWAY	22	-1.42864	0.0583501	0.237763
HALLMARK_IL2_STAT5_SIGNALING	191	-1.4243	0	0.242454
REACTOME_PLATELET_ACTIVATION_SIGNALING_AND_AGGREGATION	232	-1.42349	0.00390625	0.241616
REACTOME_REGULATION_OF_RUNX2_EXPRESSION_AND_ACTIVITY	52	-1.42032	0.0497018	0.24463
REACTOME_RNA_POLYMERASE_II_TRANSCRIBES_SNRNA_GENES	71	-1.41929	0.034	0.24395
HALLMARK_CHOLESTEROL_HOMEOSTASIS	70	-1.41759	0.0340681	0.244077
REACTOME_HEMOSTASIS	468	-1.40716	0	0.258089
HALLMARK_MTORC1_SIGNALING	196	-1.40064	0.00610998	0.266645
BIOCARTA_IL2RB_PATHWAY	36	-1.39381	0.0556701	0.275614
REACTOME_TRANSLESION_SYNTHESIS_BY_POLH	19	-1.39315	0.100604	0.274534
BIOCARTA_NTHI_PATHWAY	22	-1.39204	0.0854167	0.274211
BIOCARTA_41BB_PATHWAY	16	-1.38896	0.1167	0.277391
REACTOME_G2_M_CHECKPOINTS	150	-1.38625	0.0162933	0.279467
REACTOME_SCF_SKP2_MEDIATED_DEGRADATION_OF_P27_P21	58	-1.38472	0.0527383	0.279716
REACTOME_DEPOSITION_OF_NEW_CENPA_CONTAINING_NUCLEOSOMES_AT_THE_CENTROMERE	51	-1.38316	0.0552268	0.280234
REACTOME_TP53_REGULATES_TRANSCRIPTION_OF_CELL_CYCLE_GENES	33	-1.38309	0.0864198	0.27812
REACTOME_HSF1_DEPENDENT_TRANSACTIVATION	23	-1.38129	0.086785	0.279101
REACTOME_APC_C_MEDIATED_DEGRADATION_OF_CELL_CYCLE_PROTEINS	85	-1.37609	0.0475285	0.28606
REACTOME_DNA_STRAND_ELONGATION	23	-1.3729	0.0790021	0.289274
REACTOME_SENESCENCE_ASSOCIATED_SECRETORY_PHENOTYPE_SASP	39	-1.36907	0.0569745	0.29356
REACTOME_PYROPTOSIS	21	-1.36282	0.10883	0.302835
REACTOME_APOPTOTIC_FACTOR_MEDIATED_RESPONSE	17	-1.36267	0.109053	0.300797
REACTOME_CELLULAR_SENESCENCE	91	-1.36032	0.0375	0.302857
BIOCARTA_CHEMICAL_PATHWAY	18	-1.35673	0.113546	0.307127
REACTOME_FCERI_MEDIATED_CA_2_MOBILIZATION	29	-1.3521	0.0981964	0.31352
REACTOME_SWITCHING_OF_ORIGINS_TO_A_POST_REPLICATIVE_STATE	90	-1.35165	0.0410678	0.312051
REACTOME_INTERLEUKIN_1_FAMILY_SIGNALING	113	-1.35135	0.0336634	0.310266
REACTOME_NRIF_SIGNALS_CELL_DEATH_FROM_THE_NUCLEUS	15	-1.35069	0.11811	0.309202
REACTOME_DEGRADATION_OF_DVL	55	-1.34435	0.08125	0.318459
REACTOME_PINK1_PRKN_MEDIATED_MITOPHAGY	22	-1.34395	0.0911111	0.317054
REACTOME_G1_S_DNA_DAMAGE_CHECKPOINTS	64	-1.34274	0.0728347	0.317127
REACTOME_CYTOKINE_SIGNALING_IN_IMMUNE_SYSTEM	410	-1.34088	0.00392157	0.318491
BIOCARTA_STRESS_PATHWAY	24	-1.34012	0.102345	0.317836
REACTOME_TNFR2_NON_CANONICAL_NF_KB_PATHWAY	93	-1.33997	0.0462428	0.315872
REACTOME_RUNX1_REGULATES_GENES_INVOLVED_IN_MEGAKARYOCYTE_DIFFERENTIATION_AND_PLATELET_FUNCTION	53	-1.33963	0.0604167	0.314253
REACTOME_COMPLEMENT_CASCADE	35	-1.33731	0.0965795	0.316298
REACTOME_HDR_THROUGH_HOMOLOGOUS_RECOMBINATION_HRR	56	-1.33602	0.0733198	0.316228
REACTOME_DOWNSTREAM_SIGNALING_EVENTS_OF_B_CELL_RECEPTOR_BCR	78	-1.33547	0.0607287	0.314945
REACTOME_G1_S_TRANSITION	103	-1.33382	0.043299	0.315671
HALLMARK_COMPLEMENT	171	-1.33103	0.0326531	0.31867
REACTOME_RAP1_SIGNALLING	15	-1.32236	0.140426	0.333305
REACTOME_CHEMOKINE_RECEPTORS_BIND_CHEMOKINES	41	-1.32082	0.10241	0.334021
REACTOME_METALLOPROTEASE_DUBS	22	-1.31865	0.133745	0.336261
REACTOME_HSP90_CHAPERONE_CYCLE_FOR_STEROID_HORMONE_RECEPTORS_SHR_IN_THE_PRESENCE_OF_LIGAND	47	-1.31769	0.101053	0.336029
REACTOME_ACTIVATION_OF_APC_C_AND_APC_C_CDC20_MEDIATED_DEGRADATION_OF_MITOTIC_PROTEINS	75	-1.31729	0.0759754	0.334597
REACTOME_CYTOSOLIC_SENSORS_OF_PATHOGEN_ASSOCIATED_DNA	32	-1.31496	0.107505	0.337139
REACTOME_G_ALPHA_Q_SIGNALLING_EVENTS	149	-1.30941	0.0489796	0.34598
REACTOME_SURFACTANT_METABOLISM	16	-1.30785	0.123288	0.346899
HALLMARK_P53_PATHWAY	195	-1.30505	0.0448065	0.350071
REACTOME_E3_UBIQUITIN_LIGASES_UBIQUITINATE_TARGET_PROTEINS	47	-1.30268	0.114754	0.352636
BIOCARTA_VIP_PATHWAY	23	-1.3002	0.120408	0.355577
REACTOME_RESOLUTION_OF_AP_SITES_VIA_THE_MULTIPLE_NUCLEOTIDE_PATCH_REPLACEMENT_PATHWAY	24	-1.29969	0.150206	0.354425
REACTOME_INTERLEUKIN_2_FAMILY_SIGNALING	29	-1.2992	0.132911	0.353185
REACTOME_FCERI_MEDIATED_NF_KB_ACTIVATION	77	-1.2973	0.0916497	0.354714
REACTOME_CONDENSATION_OF_PROPHASE_CHROMOSOMES	34	-1.29566	0.119675	0.35569
REACTOME_CELLULAR_RESPONSE_TO_HYPOXIA	69	-1.29501	0.082	0.354812
REACTOME_PROCESSIVE_SYNTHESIS_ON_THE_C_STRAND_OF_THE_TELOMERE	17	-1.29303	0.156504	0.356635
REACTOME_REGULATION_OF_RUNX3_EXPRESSION_AND_ACTIVITY	54	-1.29102	0.114341	0.358333
HALLMARK_KRAS_SIGNALING_UP	181	-1.28452	0.0478088	0.36876
REACTOME_FC_EPSILON_RECEPTOR_FCERI_SIGNALING	119	-1.28373	0.0685484	0.368266
REACTOME_MITOPHAGY	29	-1.27843	0.133909	0.377013
REACTOME_SIGNALING_BY_CSF3_G_CSF	22	-1.27725	0.158513	0.377301
REACTOME_RHOBTB2_GTPASE_CYCLE	22	-1.27594	0.172619	0.378045
REACTOME_METABOLISM_OF_POLYAMINES	56	-1.27032	0.121212	0.387499
REACTOME_ROLE_OF_LAT2_NTAL_LAB_ON_CALCIUM_MOBILIZATION	15	-1.26905	0.186879	0.387997
BIOCARTA_STATHMIN_PATHWAY	19	-1.2686	0.15213	0.386732
REACTOME_CLEC7A_DECTIN_1_SIGNALING	92	-1.26392	0.0957447	0.394647
REACTOME_INTEGRIN_SIGNALING	24	-1.26264	0.162698	0.395213
REACTOME_S_PHASE	144	-1.26206	0.0547667	0.394192
REACTOME_CDK_MEDIATED_PHOSPHORYLATION_AND_REMOVAL_OF_CDC6	71	-1.26134	0.114919	0.393471
REACTOME_TRANSCRIPTIONAL_REGULATION_BY_RUNX1	160	-1.26082	0.0764706	0.39229
REACTOME_JNK_C_JUN_KINASES_PHOSPHORYLATION_AND_ACTIVATION_MEDIATED_BY_ACTIVATED_HUMAN_TAK1	22	-1.26036	0.170254	0.391186
REACTOME_TRANSPORT_OF_MATURE_TRANSCRIPT_TO_CYTOPLASM	75	-1.25502	0.0977131	0.400661
REACTOME_TELOMERE_EXTENSION_BY_TELOMERASE	19	-1.25378	0.164882	0.401043
REACTOME_INTEGRIN_CELL_SURFACE_INTERACTIONS	68	-1.24826	0.126531	0.410978
BIOCARTA_TOLL_PATHWAY	24	-1.24741	0.176938	0.41058
REACTOME_DNA_REPLICATION_PRE_INITIATION	98	-1.24707	0.078	0.409093
REACTOME_SIGNALING_BY_GPCR	420	-1.24628	0.0234834	0.408413
REACTOME_TRISTETRAPROLIN_TTP_ZFP36_BINDS_AND_DESTABILIZES_MRNA	16	-1.24239	0.202614	0.414754
REACTOME_APC_C_CDH1_MEDIATED_DEGRADATION_OF_CDC20_AND_OTHER_APC_C_CDH1_TARGETED_PROTEINS_IN_LATE_MITOSIS_EARLY_G1	73	-1.24016	0.12549	0.417449
REACTOME_FGFR2_ALTERNATIVE_SPLICING	17	-1.23864	0.158537	0.41865
REACTOME_MITOTIC_G1_PHASE_AND_G1_S_TRANSITION	128	-1.2382	0.111579	0.41746
REACTOME_THE_ROLE_OF_GTSE1_IN_G2_M_PROGRESSION_AFTER_G2_CHECKPOINT	71	-1.23703	0.129293	0.418076
REACTOME_THROMBOXANE_SIGNALLING_THROUGH_TP_RECEPTOR	21	-1.23553	0.17437	0.41932
REACTOME_TP53_REGULATES_METABOLIC_GENES	70	-1.23159	0.134809	0.425501
REACTOME_THROMBIN_SIGNALLING_THROUGH_PROTEINASE_ACTIVATED_RECEPTORS_PARS	28	-1.2264	0.172485	0.434957
REACTOME_CELL_CYCLE_CHECKPOINTS	270	-1.22602	0.0403071	0.433595
REACTOME_ACTIVATED_TAK1_MEDIATES_P38_MAPK_ACTIVATION	24	-1.2224	0.18107	0.439718
REACTOME_DEGRADATION_OF_AXIN	54	-1.22217	0.164751	0.438006
REACTOME_FLT3_SIGNALING	30	-1.22117	0.195122	0.438095
REACTOME_DEADENYLATION_OF_MRNA	23	-1.21677	0.2	0.446333
REACTOME_INTERLEUKIN_3_INTERLEUKIN_5_AND_GM_CSF_SIGNALING	38	-1.21221	0.184369	0.45442
REACTOME_TNFS_BIND_THEIR_PHYSIOLOGICAL_RECEPTORS	23	-1.20774	0.205825	0.462705
REACTOME_STABILIZATION_OF_P53	55	-1.1999	0.175105	0.479495
REACTOME_GAMMA_CARBOXYLATION_HYPUSINYLATION_HYDROXYLATION_AND_ARYLSULFATASE_ACTIVATION	51	-1.19447	0.163136	0.490698
REACTOME_DECTIN_1_MEDIATED_NONCANONICAL_NF_KB_SIGNALING	57	-1.19436	0.16568	0.488625
REACTOME_COSTIMULATION_BY_THE_CD28_FAMILY	61	-1.19181	0.171488	0.492903
HALLMARK_ANGIOGENESIS	34	-1.19155	0.190871	0.491173
BIOCARTA_IL6_PATHWAY	22	-1.18782	0.237219	0.498235
REACTOME_STRIATED_MUSCLE_CONTRACTION	34	-1.18574	0.220532	0.501383
HALLMARK_APOPTOSIS	155	-1.18477	0.118	0.501302
REACTOME_TP53_REGULATES_TRANSCRIPTION_OF_ADDITIONAL_CELL_CYCLE_GENES_WHOSE_EXACT_ROLE_IN_THE_P53_PATHWAY_REMAIN_UNCERTAIN	18	-1.18432	0.234343	0.500051
HALLMARK_G2M_CHECKPOINT	195	-1.18376	0.124	0.499129
BIOCARTA_SPRY_PATHWAY	16	-1.18256	0.230126	0.499725
REACTOME_REGULATION_OF_NF_KAPPA_B_SIGNALING	17	-1.17967	0.248954	0.50429
REACTOME_EPIGENETIC_REGULATION_OF_GENE_EXPRESSION	113	-1.17906	0.161228	0.503346
REACTOME_DAP12_SIGNALING	28	-1.1782	0.213552	0.503253
REACTOME_SUMOYLATION_OF_TRANSCRIPTION_COFACTORS	38	-1.17655	0.208	0.505034
REACTOME_SIGNAL_AMPLIFICATION	29	-1.17225	0.230263	0.513791
REACTOME_INTERLEUKIN_RECEPTOR_SHC_SIGNALING	18	-1.17218	0.23125	0.511615
REACTOME_INSULIN_RECEPTOR_RECYCLING	26	-1.17112	0.229675	0.511937
REACTOME_UCH_PROTEINASES	80	-1.15816	0.185654	0.543196
REACTOME_ESTROGEN_DEPENDENT_GENE_EXPRESSION	72	-1.15781	0.183128	0.541774
REACTOME_HOMOLOGY_DIRECTED_REPAIR	118	-1.157	0.167641	0.541392
BIOCARTA_MITOCHONDRIA_PATHWAY	19	-1.15093	0.275449	0.555322
REACTOME_NUCLEAR_EVENTS_MEDIATED_BY_NFE2L2	55	-1.14921	0.223361	0.557394
REACTOME_INITIATION_OF_NUCLEAR_ENVELOPE_NE_REFORMATION	17	-1.14537	0.278351	0.565034
HALLMARK_PI3K_AKT_MTOR_SIGNALING	101	-1.14379	0.202041	0.566659
REACTOME_REGULATION_OF_FZD_BY_UBIQUITINATION	20	-1.14368	0.289256	0.564528
BIOCARTA_IL12_PATHWAY	18	-1.14103	0.268041	0.569344
REACTOME_DUAL_INCISION_IN_TC_NER	64	-1.14018	0.225743	0.569105
REACTOME_REGULATION_OF_TP53_ACTIVITY_THROUGH_PHOSPHORYLATION	88	-1.13935	0.21371	0.568937
REACTOME_MUSCLE_CONTRACTION	141	-1.13851	0.193416	0.568876
REACTOME_TRANSCRIPTIONAL_REGULATION_BY_RUNX2	63	-1.13675	0.234216	0.571196
REACTOME_G2_M_DNA_DAMAGE_CHECKPOINT	78	-1.13541	0.21611	0.572497
REACTOME_REGULATION_OF_HSF1_MEDIATED_HEAT_SHOCK_RESPONSE	62	-1.13213	0.237624	0.578956
REACTOME_SPRY_REGULATION_OF_FGF_SIGNALING	17	-1.13052	0.28903	0.581009
REACTOME_ANTIGEN_PRESENTATION_FOLDING_ASSEMBLY_AND_PEPTIDE_LOADING_OF_CLASS_I_MHC	28	-1.12891	0.270042	0.582893
REACTOME_ROLE_OF_PHOSPHOLIPIDS_IN_PHAGOCYTOSIS	21	-1.12602	0.310976	0.588295
REACTOME_REGULATION_OF_TNFR1_SIGNALING	49	-1.1251	0.261134	0.588396
REACTOME_PROCESSING_OF_DNA_DOUBLE_STRAND_BREAK_ENDS	75	-1.12226	0.236253	0.593861
REACTOME_APC_C_CDC20_MEDIATED_DEGRADATION_OF_CYCLIN_B	25	-1.12201	0.284797	0.592108
REACTOME_HATS_ACETYLATE_HISTONES	58	-1.12176	0.278132	0.590327
BIOCARTA_RACCYCD_PATHWAY	25	-1.12122	0.301619	0.589341
REACTOME_SMAD2_SMAD3_SMAD4_HETEROTRIMER_REGULATES_TRANSCRIPTION	26	-1.12084	0.280876	0.58808
HALLMARK_ESTROGEN_RESPONSE_LATE	170	-1.11936	0.210216	0.589519
REACTOME_IRAK1_RECRUITS_IKK_COMPLEX	15	-1.11903	0.320911	0.587994
REACTOME_SIGNALING_BY_NOTCH3	20	-1.11835	0.279919	0.587686
REACTOME_IRON_UPTAKE_AND_TRANSPORT	52	-1.11645	0.276824	0.590426
REACTOME_ADP_SIGNALLING_THROUGH_P2Y_PURINOCEPTOR_1	22	-1.11624	0.305733	0.588698
REACTOME_NOD1_2_SIGNALING_PATHWAY	32	-1.11588	0.297143	0.587251
REACTOME_DUAL_INCISION_IN_GG_NER	41	-1.11344	0.296813	0.591411
REACTOME_TRANSLESION_SYNTHESIS_BY_POLK	17	-1.11222	0.329218	0.592325
REACTOME_CYCLIN_A_CDK2_ASSOCIATED_EVENTS_AT_S_PHASE_ENTRY	70	-1.11121	0.266129	0.592818
REACTOME_SLC_MEDIATED_TRANSMEMBRANE_TRANSPORT	174	-1.1063	0.220408	0.603959
REACTOME_G0_AND_EARLY_G1	16	-1.10541	0.319742	0.60416
HALLMARK_NOTCH_SIGNALING	32	-1.09326	0.296523	0.636112
BIOCARTA_AKT_PATHWAY	21	-1.09289	0.315476	0.634793
REACTOME_TRANSMISSION_ACROSS_CHEMICAL_SYNAPSES	147	-1.09207	0.266529	0.634753
REACTOME_PROTEIN_UBIQUITINATION	67	-1.09165	0.289738	0.633511
BIOCARTA_ETS_PATHWAY	17	-1.09059	0.35084	0.63408
REACTOME_ASSEMBLY_OF_THE_PRE_REPLICATIVE_COMPLEX	83	-1.08869	0.299587	0.637071
REACTOME_PEPTIDE_LIGAND_BINDING_RECEPTORS	107	-1.08777	0.274747	0.637103
REACTOME_CELLULAR_RESPONSES_TO_STIMULI	431	-1.08713	0.204678	0.63648
REACTOME_RUNX1_REGULATES_TRANSCRIPTION_OF_GENES_INVOLVED_IN_DIFFERENTIATION_OF_HSCS	65	-1.08707	0.308316	0.634252
REACTOME_EGFR_DOWNREGULATION	29	-1.08685	0.356557	0.632461
REACTOME_PLASMA_LIPOPROTEIN_REMODELING	18	-1.08595	0.353535	0.632615
REACTOME_VLDLR_INTERNALISATION_AND_DEGRADATION	16	-1.08296	0.340164	0.638788
REACTOME_FCGAMMA_RECEPTOR_FCGR_DEPENDENT_PHAGOCYTOSIS	77	-1.07885	0.283096	0.64793
REACTOME_SIGNALING_BY_NUCLEAR_RECEPTORS	176	-1.07698	0.270378	0.650763
REACTOME_REGULATION_OF_RAS_BY_GAPS	66	-1.07599	0.313765	0.651163
REACTOME_SUMOYLATION_OF_RNA_BINDING_PROTEINS	45	-1.07538	0.319756	0.650543
REACTOME_APC_CDC20_MEDIATED_DEGRADATION_OF_NEK2A	27	-1.07461	0.321285	0.650332
REACTOME_DNA_DOUBLE_STRAND_BREAK_REPAIR	147	-1.07257	0.296523	0.65388
REACTOME_CELLULAR_RESPONSE_TO_HEAT_STRESS	81	-1.07215	0.320866	0.652625
REACTOME_REGULATION_OF_PTEN_GENE_TRANSCRIPTION	42	-1.07132	0.334702	0.652692
BIOCARTA_CXCR4_PATHWAY	19	-1.06798	0.360248	0.659908
REACTOME_BASE_EXCISION_REPAIR	38	-1.06582	0.35084	0.663819
REACTOME_INTERCONVERSION_OF_NUCLEOTIDE_DI_AND_TRIPHOSPHATES	25	-1.06491	0.367265	0.663903
REACTOME_IKK_COMPLEX_RECRUITMENT_MEDIATED_BY_RIP1	24	-1.063	0.362725	0.666976
REACTOME_REGULATION_OF_APC_C_ACTIVATORS_BETWEEN_G1_S_AND_EARLY_ANAPHASE	35	-1.05961	0.375796	0.674123
REACTOME_ACYL_CHAIN_REMODELLING_OF_PC	22	-1.05843	0.389474	0.67504
REACTOME_PROGRAMMED_CELL_DEATH	131	-1.05515	0.343558	0.682049
REACTOME_N_GLYCAN_TRIMMING_IN_THE_ER_AND_CALNEXIN_CALRETICULIN_CYCLE	16	-1.05288	0.385246	0.68643
REACTOME_AMINO_ACID_TRANSPORT_ACROSS_THE_PLASMA_MEMBRANE	28	-1.0518	0.381857	0.687254
REACTOME_HOMOLOGOUS_DNA_PAIRING_AND_STRAND_EXCHANGE	26	-1.04772	0.393878	0.697091
BIOCARTA_PAR1_PATHWAY	18	-1.04762	0.398773	0.695003
REACTOME_TRANSLESION_SYNTHESIS_BY_Y_FAMILY_DNA_POLYMERASES_BYPASSES_LESIONS_ON_DNA_TEMPLATE	38	-1.04631	0.391398	0.696466
BIOCARTA_CREB_PATHWAY	20	-1.04461	0.385932	0.698954
REACTOME_MAP2K_AND_MAPK_ACTIVATION	36	-1.04417	0.375502	0.69785
REACTOME_CHAPERONIN_MEDIATED_PROTEIN_FOLDING	36	-1.04377	0.391051	0.696599
REACTOME_TRANSCRIPTIONAL_REGULATION_BY_TP53	289	-1.04234	0.323529	0.69806
REACTOME_TERMINATION_OF_TRANSLESION_DNA_SYNTHESIS	31	-1.04005	0.394737	0.702265
REACTOME_AZATHIOPRINE_ADME	21	-1.03885	0.395626	0.703341
BIOCARTA_ARENRF2_PATHWAY	18	-1.03755	0.373541	0.704535
REACTOME_PTEN_REGULATION	112	-1.03566	0.363992	0.707747
BIOCARTA_CTLA4_PATHWAY	15	-1.03523	0.391667	0.706527
REACTOME_TNFR1_INDUCED_NF_KAPPA_B_SIGNALING_PATHWAY	34	-1.03414	0.383142	0.707302
BIOCARTA_TCR_PATHWAY	41	-1.02932	0.40133	0.719367
REACTOME_ACYL_CHAIN_REMODELLING_OF_PE	21	-1.02716	0.409736	0.722969
BIOCARTA_IL7_PATHWAY	16	-1.02265	0.419831	0.733799
REACTOME_TAK1_DEPENDENT_IKK_AND_NF_KAPPA_B_ACTIVATION	38	-1.02193	0.458101	0.733628
REACTOME_ESR_MEDIATED_SIGNALING	134	-1.01959	0.390533	0.738298
REACTOME_CELLULAR_RESPONSE_TO_CHEMICAL_STRESS	153	-1.01929	0.385686	0.736756
REACTOME_TRAF6_MEDIATED_INDUCTION_OF_TAK1_COMPLEX_WITHIN_TLR4_COMPLEX	17	-1.01858	0.43299	0.73653
BIOCARTA_TEL_PATHWAY	17	-1.01362	0.452906	0.748539
REACTOME_TOLL_LIKE_RECEPTOR_CASCADES	138	-1.01311	0.390873	0.747535
BIOCARTA_EICOSANOID_PATHWAY	20	-1.00959	0.428571	0.755604
REACTOME_OVARIAN_TUMOR_DOMAIN_PROTEASES	32	-1.00472	0.440239	0.767435
REACTOME_PROTEIN_METHYLATION	19	-1.00087	0.434322	0.776454
BIOCARTA_BCELLSURVIVAL_PATHWAY	16	-0.999878	0.433594	0.77692
REACTOME_REGULATION_OF_PTEN_STABILITY_AND_ACTIVITY	68	-0.996556	0.474409	0.784472
REACTOME_MITOTIC_METAPHASE_AND_ANAPHASE	220	-0.993091	0.481781	0.79239
REACTOME_SIGNALING_BY_RETINOIC_ACID	34	-0.99288	0.439673	0.790417
REACTOME_NEGATIVE_REGULATION_OF_FGFR3_SIGNALING	24	-0.991908	0.461039	0.790782
REACTOME_SIGNALING_BY_NOTCH1	19	-0.985488	0.471526	0.808147
REACTOME_TNFR1_INDUCED_PROAPOPTOTIC_SIGNALING	23	-0.984092	0.463203	0.809989
HALLMARK_APICAL_SURFACE	40	-0.981547	0.469786	0.815156
BIOCARTA_FCER1_PATHWAY	38	-0.979011	0.476861	0.820218
REACTOME_SUMOYLATION	153	-0.977723	0.496154	0.821745
REACTOME_REGULATION_OF_SIGNALING_BY_CBL	22	-0.974747	0.494867	0.828679
REACTOME_PHASE_II_CONJUGATION_OF_COMPOUNDS	66	-0.973536	0.480989	0.829752
REACTOME_CHOLESTEROL_BIOSYNTHESIS	26	-0.973007	0.491936	0.828811
REACTOME_PKR_MEDIATED_SIGNALING	62	-0.968334	0.548936	0.84015
BIOCARTA_MAPK_PATHWAY	75	-0.964684	0.52449	0.848344
REACTOME_RHO_GTPASES_ACTIVATE_WASPS_AND_WAVES	32	-0.964467	0.511387	0.846423
REACTOME_DNA_DOUBLE_STRAND_BREAK_RESPONSE	64	-0.962709	0.519669	0.849521
REACTOME_SUMOYLATION_OF_CHROMATIN_ORGANIZATION_PROTEINS	60	-0.962703	0.530693	0.846939
HALLMARK_XENOBIOTIC_METABOLISM	162	-0.961138	0.553971	0.849211
BIOCARTA_MCALPAIN_PATHWAY	19	-0.960573	0.492843	0.848296
REACTOME_PCP_CE_PATHWAY	85	-0.959922	0.54191	0.847732
REACTOME_CYCLIN_A_B1_B2_ASSOCIATED_EVENTS_DURING_G2_M_TRANSITION	24	-0.957097	0.52686	0.853547
REACTOME_NONHOMOLOGOUS_END_JOINING_NHEJ	54	-0.954781	0.524008	0.85812
REACTOME_DEGRADATION_OF_BETA_CATENIN_BY_THE_DESTRUCTION_COMPLEX	79	-0.954428	0.52682	0.856564
REACTOME_BETA_CATENIN_INDEPENDENT_WNT_SIGNALING	118	-0.952883	0.571429	0.858818
REACTOME_CYCLIN_D_ASSOCIATED_EVENTS_IN_G1	43	-0.952227	0.493952	0.85823
REACTOME_INTERFERON_ALPHA_BETA_SIGNALING	20	-0.951552	0.530364	0.857754
REACTOME_SNRNP_ASSEMBLY	46	-0.951165	0.541016	0.856464
BIOCARTA_BIOPEPTIDES_PATHWAY	26	-0.950433	0.53	0.856114
HALLMARK_ANDROGEN_RESPONSE	88	-0.949987	0.555785	0.855079
REACTOME_SYNTHESIS_OF_PA	31	-0.948664	0.550102	0.856365
REACTOME_MYD88_MAL_TIRAP_CASCADE_INITIATED_ON_PLASMA_MEMBRANE	83	-0.948148	0.554217	0.855471
REACTOME_MYD88_INDEPENDENT_TLR4_CASCADE	99	-0.947563	0.574597	0.854807
REACTOME_TRANSPORT_OF_VITAMINS_NUCLEOSIDES_AND_RELATED_MOLECULES	32	-0.947491	0.539526	0.85256
BIOCARTA_IL2_PATHWAY	22	-0.947391	0.52621	0.850453
REACTOME_INTERLEUKIN_7_SIGNALING	22	-0.946573	0.513684	0.85038
BIOCARTA_G2_PATHWAY	21	-0.941121	0.546012	0.86416
REACTOME_SEPARATION_OF_SISTER_CHROMATIDS	182	-0.938991	0.636179	0.868
REACTOME_SIGNALING_BY_NOTCH	39	-0.936729	0.569937	0.872319
REACTOME_TRANSPORT_OF_INORGANIC_CATIONS_ANIONS_AND_AMINO_ACIDS_OLIGOPEPTIDES	81	-0.93628	0.57002	0.871013
REACTOME_RHO_GTPASE_EFFECTORS	235	-0.935751	0.637113	0.870116
BIOCARTA_CARDIACEGF_PATHWAY	17	-0.935379	0.530738	0.868758
REACTOME_SIGNALING_BY_ROBO_RECEPTORS	21	-0.931196	0.569264	0.878304
REACTOME_TOLL_LIKE_RECEPTOR_4_TLR4_CASCADE	114	-0.929851	0.635081	0.879829
REACTOME_RHO_GTPASES_ACTIVATE_PAKS	22	-0.92586	0.570231	0.888646
REACTOME_METABOLISM_OF_AMINO_ACIDS_AND_DERIVATIVES	203	-0.920956	0.683333	0.900383
REACTOME_RHOBTB_GTPASE_CYCLE	34	-0.919702	0.600402	0.90133
REACTOME_DNA_DAMAGE_BYPASS	47	-0.918231	0.62955	0.902977
REACTOME_ENDOSOMAL_SORTING_COMPLEX_REQUIRED_FOR_TRANSPORT_ESCRT	30	-0.917371	0.595833	0.902835
REACTOME_PRESYNAPTIC_FUNCTION_OF_KAINATE_RECEPTORS	17	-0.913985	0.576596	0.909994
REACTOME_TRANSCRIPTION_COUPLED_NUCLEOTIDE_EXCISION_REPAIR_TC_NER	76	-0.913491	0.645963	0.908956
REACTOME_REGULATION_OF_TP53_DEGRADATION	35	-0.91205	0.594883	0.91056
REACTOME_RNA_POLYMERASE_III_TRANSCRIPTION_INITIATION_FROM_TYPE_3_PROMOTER	26	-0.910526	0.582834	0.91246
REACTOME_RAF_INDEPENDENT_MAPK1_3_ACTIVATION	22	-0.909396	0.580972	0.91319
REACTOME_NUCLEOTIDE_EXCISION_REPAIR	108	-0.907925	0.682377	0.915081
BIOCARTA_DEATH_PATHWAY	30	-0.907686	0.608974	0.913261
REACTOME_SUMOYLATION_OF_DNA_REPLICATION_PROTEINS	41	-0.902846	0.620408	0.923942
REACTOME_HDMS_DEMETHYLATE_HISTONES	40	-0.900048	0.600406	0.929127
REACTOME_CROSS_PRESENTATION_OF_SOLUBLE_EXOGENOUS_ANTIGENS_ENDOSOMES	46	-0.897078	0.653527	0.934401
BIOCARTA_BCR_PATHWAY	31	-0.89248	0.646055	0.944686
REACTOME_SIGNALING_BY_FGFR3	34	-0.89143	0.624746	0.944939
REACTOME_G_BETA_GAMMA_SIGNALLING_THROUGH_CDC42	17	-0.890661	0.602941	0.944533
REACTOME_INTERFERON_GAMMA_SIGNALING	18	-0.88975	0.608163	0.944565
REACTOME_INTRACELLULAR_SIGNALING_BY_SECOND_MESSENGERS	244	-0.889055	0.794971	0.943985
REACTOME_REGULATION_OF_TP53_ACTIVITY_THROUGH_METHYLATION	18	-0.885599	0.650485	0.950684
REACTOME_CLATHRIN_MEDIATED_ENDOCYTOSIS	128	-0.885089	0.713987	0.949589
REACTOME_GLI3_IS_PROCESSED_TO_GLI3R_BY_THE_PROTEASOME	57	-0.884413	0.685547	0.948882
REACTOME_CELL_EXTRACELLULAR_MATRIX_INTERACTIONS	17	-0.883083	0.616183	0.949885
REACTOME_SYNTHESIS_OF_ACTIVE_UBIQUITIN_ROLES_OF_E1_AND_E2_ENZYMES	31	-0.882792	0.654076	0.948107
BIOCARTA_TOB1_PATHWAY	17	-0.882565	0.608511	0.94625
REACTOME_MAPK_FAMILY_SIGNALING_CASCADES	269	-0.882508	0.835821	0.943929
REACTOME_SUMOYLATION_OF_DNA_DAMAGE_RESPONSE_AND_REPAIR_PROTEINS	72	-0.876261	0.662722	0.957046
HALLMARK_HEDGEHOG_SIGNALING	33	-0.876177	0.650862	0.954736
BIOCARTA_CASPASE_PATHWAY	22	-0.874258	0.642715	0.957
REACTOME_TRANSPORT_OF_BILE_SALTS_AND_ORGANIC_ACIDS_METAL_IONS_AND_AMINE_COMPOUNDS	56	-0.87262	0.726054	0.958646
REACTOME_NEGATIVE_REGULATION_OF_MAPK_PATHWAY	43	-0.868042	0.661017	0.967587
REACTOME_INTERFERON_SIGNALING	118	-0.867973	0.776371	0.965236
REACTOME_SIGNALING_BY_VEGF	100	-0.8625	0.761341	0.976603
REACTOME_DOWNREGULATION_OF_ERBB2_SIGNALING	26	-0.861239	0.648485	0.977212
REACTOME_RAC1_GTPASE_CYCLE	167	-0.856602	0.825832	0.986167
REACTOME_CHROMATIN_MODIFYING_ENZYMES	167	-0.856214	0.846	0.984614
REACTOME_TRANSCRIPTIONAL_REGULATION_BY_E2F6	23	-0.854552	0.667364	0.986134
BIOCARTA_GLEEVEC_PATHWAY	23	-0.851405	0.688391	0.991051
REACTOME_ACTIVATION_OF_IRF3_IRF7_MEDIATED_BY_TBK1_IKBKE	18	-0.851133	0.68616	0.989204
REACTOME_ADRENALINE_NORADRENALINE_INHIBITS_INSULIN_SECRETION	20	-0.848102	0.682203	0.993653
HALLMARK_SPERMATOGENESIS	93	-0.846981	0.796715	0.993711
REACTOME_ION_CHANNEL_TRANSPORT	140	-0.846882	0.806061	0.991476
REACTOME_GLOBAL_GENOME_NUCLEOTIDE_EXCISION_REPAIR_GG_NER	81	-0.846394	0.77732	0.990225
BIOCARTA_ATM_PATHWAY	18	-0.843343	0.685039	0.995075
REACTOME_PLASMA_LIPOPROTEIN_ASSEMBLY_REMODELING_AND_CLEARANCE	53	-0.843146	0.771134	0.993022
REACTOME_TOLL_LIKE_RECEPTOR_9_TLR9_CASCADE	93	-0.842391	0.792	0.992287
REACTOME_MITOTIC_PROPHASE	89	-0.839623	0.812992	0.996005
REACTOME_INTERLEUKIN_17_SIGNALING	58	-0.839566	0.750515	0.993676
BIOCARTA_RAC1_PATHWAY	21	-0.832246	0.702595	1
REACTOME_DEACTIVATION_OF_THE_BETA_CATENIN_TRANSACTIVATING_COMPLEX	31	-0.831737	0.72541	1
REACTOME_DOWNREGULATION_OF_SMAD2_3_SMAD4_TRANSCRIPTIONAL_ACTIVITY	23	-0.830193	0.725971	1
REACTOME_CASPASE_ACTIVATION_VIA_DEATH_RECEPTORS_IN_THE_PRESENCE_OF_LIGAND	15	-0.825322	0.730361	1
REACTOME_ASYMMETRIC_LOCALIZATION_OF_PCP_PROTEINS	61	-0.822761	0.807377	1
REACTOME_DNA_REPAIR	285	-0.820682	0.944112	1
REACTOME_RAC2_GTPASE_CYCLE	83	-0.816915	0.83368	1
REACTOME_POSITIVE_EPIGENETIC_REGULATION_OF_RRNA_EXPRESSION	29	-0.815754	0.762397	1
REACTOME_DNA_DAMAGE_RECOGNITION_IN_GG_NER	39	-0.815104	0.789691	1
REACTOME_ACTIVATION_OF_G_PROTEIN_GATED_POTASSIUM_CHANNELS	24	-0.813888	0.743539	1
REACTOME_SIGNALING_BY_FGFR2	55	-0.810827	0.798077	1
BIOCARTA_MET_PATHWAY	33	-0.810495	0.772908	1
REACTOME_RESOLUTION_OF_D_LOOP_STRUCTURES	32	-0.807779	0.758197	1
REACTOME_NEGATIVE_REGULATION_OF_MET_ACTIVITY	21	-0.803278	0.75154	1
REACTOME_CARGO_RECOGNITION_FOR_CLATHRIN_MEDIATED_ENDOCYTOSIS	90	-0.801908	0.880851	1
REACTOME_DOWNREGULATION_OF_TGF_BETA_RECEPTOR_SIGNALING	17	-0.800126	0.756989	1
REACTOME_DEUBIQUITINATION	226	-0.799901	0.947368	1
REACTOME_M_PHASE	353	-0.794335	0.984	1
REACTOME_TRANSPORT_OF_MATURE_MRNAS_DERIVED_FROM_INTRONLESS_TRANSCRIPTS	41	-0.793657	0.823899	1
REACTOME_BRANCHED_CHAIN_AMINO_ACID_CATABOLISM	20	-0.792954	0.755144	1
REACTOME_SUMOYLATION_OF_SUMOYLATION_PROTEINS	33	-0.792554	0.793319	1
REACTOME_PKMTS_METHYLATE_HISTONE_LYSINES	60	-0.792028	0.835968	1
BIOCARTA_ECM_PATHWAY	21	-0.791064	0.772455	1
REACTOME_TRANSFERRIN_ENDOCYTOSIS_AND_RECYCLING	28	-0.78865	0.799582	1
REACTOME_TRANSCRIPTIONAL_REGULATION_BY_RUNX3	78	-0.785733	0.89662	1
REACTOME_HDR_THROUGH_SINGLE_STRAND_ANNEALING_SSA	35	-0.785648	0.809886	1
REACTOME_PLATELET_SENSITIZATION_BY_LDL	16	-0.781565	0.768612	1
REACTOME_INOSITOL_PHOSPHATE_METABOLISM	45	-0.778441	0.871166	1
REACTOME_KEAP1_NFE2L2_PATHWAY	77	-0.777626	0.902128	1
REACTOME_RNA_POLYMERASE_III_TRANSCRIPTION	34	-0.775134	0.827292	1
REACTOME_VASOPRESSIN_REGULATES_RENAL_WATER_HOMEOSTASIS_VIA_AQUAPORINS	27	-0.774588	0.822957	1
REACTOME_SIGNALING_BY_EGFR	44	-0.774346	0.857143	1
REACTOME_ANTIVIRAL_MECHANISM_BY_IFN_STIMULATED_GENES	88	-0.7712	0.901606	1
REACTOME_G_ALPHA_Z_SIGNALLING_EVENTS	27	-0.766187	0.792812	1
REACTOME_TNF_SIGNALING	58	-0.762952	0.878378	1
REACTOME_TRANSPORT_OF_THE_SLBP_DEPENDANT_MATURE_MRNA	34	-0.760347	0.855691	1
REACTOME_TRANSCRIPTIONAL_ACTIVITY_OF_SMAD2_SMAD3_SMAD4_HETEROTRIMER	39	-0.7598	0.878788	1
REACTOME_NUCLEAR_PORE_COMPLEX_NPC_DISASSEMBLY	31	-0.759118	0.83004	1
REACTOME_NUCLEAR_EVENTS_KINASE_AND_TRANSCRIPTION_FACTOR_ACTIVATION	27	-0.757586	0.819444	1
REACTOME_RHO_GTPASES_ACTIVATE_FORMINS	131	-0.748	0.977131	1
REACTOME_RNA_POLYMERASE_II_PROMOTER_ESCAPE	44	-0.747517	0.881423	1
REACTOME_UB_SPECIFIC_PROCESSING_PROTEASES	157	-0.745957	0.972973	1
REACTOME_NEGATIVE_REGULATION_OF_FGFR2_SIGNALING	27	-0.74515	0.829875	1
REACTOME_PLASMA_LIPOPROTEIN_CLEARANCE	30	-0.744294	0.856846	1
REACTOME_RAS_PROCESSING	24	-0.73936	0.867589	1
REACTOME_RNA_POLYMERASE_II_PRE_TRANSCRIPTION_EVENTS	75	-0.739017	0.942688	1
REACTOME_SIGNALING_BY_ERYTHROPOIETIN	16	-0.737402	0.820896	1
REACTOME_SIGNALING_BY_RECEPTOR_TYROSINE_KINASES	378	-0.736491	1	1
REACTOME_FORMATION_OF_INCISION_COMPLEX_IN_GG_NER	43	-0.734151	0.899598	1
BIOCARTA_IGF1R_PATHWAY	22	-0.73204	0.833333	1
BIOCARTA_CELLCYCLE_PATHWAY	22	-0.73048	0.854871	1
BIOCARTA_CERAMIDE_PATHWAY	22	-0.729565	0.848548	1
REACTOME_DEATH_RECEPTOR_SIGNALING	136	-0.726062	0.982	1
BIOCARTA_G1_PATHWAY	25	-0.723187	0.838583	1
REACTOME_BUTYRATE_RESPONSE_FACTOR_1_BRF1_BINDS_AND_DESTABILIZES_MRNA	16	-0.722334	0.837553	1
REACTOME_ADP_SIGNALLING_THROUGH_P2Y_PURINOCEPTOR_12	18	-0.72184	0.852814	1
REACTOME_PROSTACYCLIN_SIGNALLING_THROUGH_PROSTACYCLIN_RECEPTOR	16	-0.719656	0.856531	1
REACTOME_METABOLISM_OF_NUCLEOTIDES	87	-0.719006	0.94929	1
REACTOME_NEGATIVE_REGULATION_OF_FGFR4_SIGNALING	26	-0.718019	0.86722	1
REACTOME_TCF_DEPENDENT_SIGNALING_IN_RESPONSE_TO_WNT	144	-0.710839	0.993711	1
REACTOME_NUCLEOTIDE_SALVAGE	22	-0.710481	0.895277	1
REACTOME_PEROXISOMAL_PROTEIN_IMPORT	56	-0.709269	0.952286	1
REACTOME_G_PROTEIN_ACTIVATION	19	-0.707104	0.869565	1
REACTOME_METABOLISM_OF_PORPHYRINS	21	-0.706333	0.865462	1
BIOCARTA_PTEN_PATHWAY	16	-0.706026	0.852391	1
REACTOME_CITRIC_ACID_CYCLE_TCA_CYCLE	22	-0.705079	0.881743	1
BIOCARTA_TPO_PATHWAY	25	-0.704872	0.907173	1
REACTOME_AMPLIFICATION_OF_SIGNAL_FROM_THE_KINETOCHORES	93	-0.703145	0.97093	1
REACTOME_RHOBTB1_GTPASE_CYCLE	22	-0.696653	0.879747	1
BIOCARTA_TNFR1_PATHWAY	28	-0.693271	0.911824	1
BIOCARTA_ATRBRCA_PATHWAY	18	-0.688017	0.880342	1
REACTOME_MITOTIC_SPINDLE_CHECKPOINT	110	-0.687953	0.994197	1
REACTOME_POSTMITOTIC_NUCLEAR_PORE_COMPLEX_NPC_REFORMATION	22	-0.685095	0.895425	1
REACTOME_INWARDLY_RECTIFYING_K_CHANNELS	29	-0.682071	0.939457	1
REACTOME_TP53_REGULATES_TRANSCRIPTION_OF_DNA_REPAIR_GENES	43	-0.677861	0.962617	1
REACTOME_SIGNALING_BY_INSULIN_RECEPTOR	61	-0.677253	0.967495	1
REACTOME_G_PROTEIN_BETA_GAMMA_SIGNALLING	29	-0.673692	0.931174	1
REACTOME_EPHB_MEDIATED_FORWARD_SIGNALING	35	-0.672496	0.948413	1
BIOCARTA_PYK2_PATHWAY	25	-0.671242	0.932238	1
BIOCARTA_CTCF_PATHWAY	24	-0.665774	0.911579	1
REACTOME_RAC3_GTPASE_CYCLE	85	-0.663578	0.988048	1
REACTOME_NUCLEAR_ENVELOPE_BREAKDOWN	46	-0.660485	0.955285	1
BIOCARTA_FMLP_PATHWAY	31	-0.65731	0.946281	1
REACTOME_CONVERSION_FROM_APC_C_CDC20_TO_APC_C_CDH1_IN_LATE_ANAPHASE	20	-0.65473	0.915254	1
REACTOME_RHOG_GTPASE_CYCLE	70	-0.654483	0.982387	1
REACTOME_CLASS_I_PEROXISOMAL_MEMBRANE_PROTEIN_IMPORT	19	-0.651968	0.928854	1
REACTOME_SIGNALING_BY_SCF_KIT	36	-0.651385	0.961461	1
REACTOME_MITOTIC_G2_G2_M_PHASES	178	-0.649891	1	1
REACTOME_RUNX1_INTERACTS_WITH_CO_FACTORS_WHOSE_PRECISE_EFFECT_ON_RUNX1_TARGETS_IS_NOT_KNOWN	34	-0.648432	0.953125	1
REACTOME_CD209_DC_SIGN_SIGNALING	16	-0.645298	0.930556	1
REACTOME_REGULATION_OF_TP53_ACTIVITY	149	-0.645222	1	1
REACTOME_NUCLEAR_ENVELOPE_NE_REASSEMBLY	62	-0.640478	0.97996	1
REACTOME_PHOSPHORYLATION_OF_THE_APC_C	20	-0.640409	0.945493	1
REACTOME_GLUCAGON_TYPE_LIGAND_RECEPTORS	19	-0.628579	0.921002	1
REACTOME_G_BETA_GAMMA_SIGNALLING_THROUGH_PI3KGAMMA	22	-0.622732	0.939638	1
REACTOME_ACTIVATION_OF_KAINATE_RECEPTORS_UPON_GLUTAMATE_BINDING	25	-0.622731	0.959227	1
REACTOME_SIGNALING_BY_FGFR4	35	-0.620562	0.957031	1
REACTOME_ABC_FAMILY_PROTEINS_MEDIATED_TRANSPORT	93	-0.617478	0.997976	1
REACTOME_COLLAGEN_CHAIN_TRIMERIZATION	35	-0.616644	0.971487	1
REACTOME_FORMATION_OF_TC_NER_PRE_INCISION_COMPLEX	53	-0.615804	0.976285	1
REACTOME_HEDGEHOG_OFF_STATE	103	-0.615727	1	1
REACTOME_FORMATION_OF_THE_BETA_CATENIN_TCF_TRANSACTIVATING_COMPLEX	23	-0.614467	0.945263	1
REACTOME_RESOLUTION_OF_SISTER_CHROMATID_COHESION	118	-0.611978	0.996101	1
BIOCARTA_ERK_PATHWAY	25	-0.601827	0.961225	1
REACTOME_METABOLISM_OF_FOLATE_AND_PTERINES	16	-0.601819	0.945607	1
REACTOME_LYSOSOME_VESICLE_BIOGENESIS	30	-0.59864	0.971487	1
REACTOME_SUMOYLATION_OF_UBIQUITINYLATION_PROTEINS	37	-0.596513	0.989899	1
HALLMARK_MYC_TARGETS_V2	58	-0.592857	0.99004	1
REACTOME_CASPASE_ACTIVATION_VIA_EXTRINSIC_APOPTOTIC_SIGNALLING_PATHWAY	18	-0.582482	0.954451	1
REACTOME_RNA_POLYMERASE_I_TRANSCRIPTION_TERMINATION	29	-0.575757	0.984405	1
REACTOME_RNA_POLYMERASE_I_TRANSCRIPTION	44	-0.574722	0.991919	1
REACTOME_INHIBITION_OF_THE_PROTEOLYTIC_ACTIVITY_OF_APC_C_REQUIRED_FOR_THE_ONSET_OF_ANAPHASE_BY_MITOTIC_SPINDLE_CHECKPOINT_COMPONENTS	21	-0.571413	0.967546	1
BIOCARTA_P38MAPK_PATHWAY	32	-0.568411	0.989362	1
REACTOME_PLATELET_CALCIUM_HOMEOSTASIS	26	-0.567897	0.968153	1
BIOCARTA_MPR_PATHWAY	16	-0.562411	0.959315	1
REACTOME_SIGNALING_BY_MET	66	-0.557431	1	1
BIOCARTA_ARF_PATHWAY	16	-0.55697	0.968944	1
BIOCARTA_AT1R_PATHWAY	25	-0.556919	0.985887	1
REACTOME_SYNTHESIS_OF_GLYCOSYLPHOSPHATIDYLINOSITOL_GPI	17	-0.544841	0.960954	1
REACTOME_PROTEIN_LOCALIZATION	92	-0.544768	1	1
REACTOME_MITOCHONDRIAL_FATTY_ACID_BETA_OXIDATION	32	-0.539538	0.984704	1
REACTOME_RHO_GTPASES_ACTIVATE_PKNS	22	-0.533739	0.984344	1
REACTOME_HDACS_DEACETYLATE_HISTONES	21	-0.528456	0.99596	1
REACTOME_SELECTIVE_AUTOPHAGY	58	-0.519976	1	1
REACTOME_RNA_POLYMERASE_III_TRANSCRIPTION_INITIATION_FROM_TYPE_1_PROMOTER	27	-0.518325	0.993789	1
REACTOME_FORMATION_OF_RNA_POL_II_ELONGATION_COMPLEX	54	-0.492906	1	1
BIOCARTA_HCMV_PATHWAY	17	-0.482385	0.995951	1
REACTOME_METABOLISM_OF_NITRIC_OXIDE_NOS3_ACTIVATION_AND_REGULATION	15	-0.470614	0.994083	1
REACTOME_FORMATION_OF_WDR5_CONTAINING_HISTONE_MODIFYING_COMPLEXES	37	-0.462396	1	1
REACTOME_SIGNAL_TRANSDUCTION_BY_L1	19	-0.412433	0.997868	1
REACTOME_GLYCOLYSIS	58	-0.400362	0.99793	1
REACTOME_REGULATION_OF_TP53_ACTIVITY_THROUGH_ACETYLATION	29	-0.379339	1	0.999899
REACTOME_FORMATION_OF_THE_CORNIFIED_ENVELOPE	36	2.40561	0	0
REACTOME_KERATINIZATION	36	2.37581	0	0
REACTOME_SIGNALING_BY_BMP	28	1.82997	0.00403226	0.162438
REACTOME_NUCLEAR_RECEPTOR_TRANSCRIPTION_PATHWAY	37	1.78985	0.00582524	0.188696
REACTOME_HS_GAG_DEGRADATION	21	1.77351	0.00553505	0.177328
REACTOME_WNT_LIGAND_BIOGENESIS_AND_TRAFFICKING	18	1.76179	0.00580271	0.165711
REACTOME_RHOB_GTPASE_CYCLE	68	1.7522	0.00408998	0.158286
REACTOME_SYNAPTIC_ADHESION_LIKE_MOLECULES	16	1.71146	0.0102459	0.206447
REACTOME_PROTEIN_PROTEIN_INTERACTIONS_AT_SYNAPSES	46	1.67206	0.00988142	0.267098
REACTOME_RHOC_GTPASE_CYCLE	69	1.64907	0.00596422	0.29684
REACTOME_CHONDROITIN_SULFATE_DERMATAN_SULFATE_METABOLISM	44	1.62183	0.00968992	0.340938
REACTOME_DEVELOPMENTAL_BIOLOGY	328	1.61723	0	0.322327
BIOCARTA_INTRINSIC_PATHWAY	15	1.60953	0.0172414	0.316629
REACTOME_NEUREXINS_AND_NEUROLIGINS	23	1.60506	0.0195312	0.304988
REACTOME_MISCELLANEOUS_TRANSPORT_AND_BINDING_EVENTS	20	1.57715	0.0238569	0.361681
REACTOME_SEMA4D_IN_SEMAPHORIN_SIGNALING	15	1.57397	0.0330739	0.348234
REACTOME_CARGO_TRAFFICKING_TO_THE_PERICILIARY_MEMBRANE	36	1.57263	0.0256917	0.331134
REACTOME_INTRAFLAGELLAR_TRANSPORT	48	1.5713	0.0162933	0.316422
REACTOME_CELL_JUNCTION_ORGANIZATION	64	1.55941	0.0140562	0.329414
BIOCARTA_HER2_PATHWAY	23	1.54276	0.0262626	0.354819
REACTOME_O_LINKED_GLYCOSYLATION	84	1.53981	0.00588235	0.345749
REACTOME_HS_GAG_BIOSYNTHESIS	24	1.53854	0.0305499	0.333095
REACTOME_METABOLISM_OF_VITAMINS_AND_COFACTORS	149	1.52529	0.00199203	0.351597
REACTOME_REGULATION_OF_LIPID_METABOLISM_BY_PPARALPHA	16	1.51472	0.0414201	0.363649
REACTOME_GLYCOSAMINOGLYCAN_METABOLISM	111	1.48905	0.0112782	0.421339
HALLMARK_KRAS_SIGNALING_DN	131	1.48799	0.0020284	0.407894
REACTOME_REGULATION_OF_PYRUVATE_DEHYDROGENASE_PDH_COMPLEX	15	1.46784	0.0622568	0.451068
REACTOME_SYNTHESIS_OF_PIPS_AT_THE_GOLGI_MEMBRANE	16	1.45503	0.0890538	0.474213
REACTOME_METABOLISM_OF_WATER_SOLUBLE_VITAMINS_AND_COFACTORS	107	1.45199	0.0121212	0.467518
REACTOME_NON_INTEGRIN_MEMBRANE_ECM_INTERACTIONS	30	1.44711	0.0546139	0.467463
REACTOME_ACTIVATION_OF_NMDA_RECEPTORS_AND_POSTSYNAPTIC_EVENTS	31	1.43997	0.0464217	0.473833
REACTOME_PHASE_I_FUNCTIONALIZATION_OF_COMPOUNDS	67	1.42886	0.0349076	0.496572
REACTOME_FATTY_ACYL_COA_BIOSYNTHESIS	26	1.42429	0.0694184	0.496196
REACTOME_HEPARAN_SULFATE_HEPARIN_HS_GAG_METABOLISM	46	1.42088	0.0440882	0.492421
BIOCARTA_WNT_PATHWAY	21	1.42018	0.0714286	0.480417
REACTOME_ENDOGENOUS_STEROLS	20	1.41691	0.0674374	0.47739
REACTOME_CROSSLINKING_OF_COLLAGEN_FIBRILS	15	1.41523	0.0893971	0.469629
REACTOME_CELL_CELL_JUNCTION_ORGANIZATION	40	1.40914	0.0578358	0.475741
HALLMARK_BILE_ACID_METABOLISM	89	1.39938	0.0356436	0.491992
REACTOME_O_GLYCOSYLATION_OF_TSR_DOMAIN_CONTAINING_PROTEINS	36	1.39586	0.0676533	0.491105
REACTOME_COPI_MEDIATED_ANTEROGRADE_TRANSPORT	90	1.37303	0.0525328	0.555743
REACTOME_COLLAGEN_FORMATION	73	1.36419	0.053719	0.574105
REACTOME_METABOLISM_OF_FAT_SOLUBLE_VITAMINS	27	1.3592	0.0916179	0.578976
REACTOME_SEMAPHORIN_INTERACTIONS	51	1.35915	0.0618956	0.565988
REACTOME_CRMPS_IN_SEMA3A_SIGNALING	15	1.34931	0.0964567	0.586924
REACTOME_UNBLOCKING_OF_NMDA_RECEPTORS_GLUTAMATE_BINDING_AND_ACTIVATION	17	1.32485	0.124506	0.665506
REACTOME_TRANSPORT_TO_THE_GOLGI_AND_SUBSEQUENT_MODIFICATION	165	1.31734	0.0296443	0.680981
REACTOME_A_TETRASACCHARIDE_LINKER_SEQUENCE_IS_REQUIRED_FOR_GAG_SYNTHESIS	21	1.31195	0.128155	0.687798
REACTOME_ELASTIC_FIBRE_FORMATION	38	1.30476	0.102996	0.701744
HALLMARK_HEME_METABOLISM	183	1.29228	0.0326531	0.739285
REACTOME_NRAGE_SIGNALS_DEATH_THROUGH_JNK	48	1.29127	0.0945674	0.728886
REACTOME_CYTOCHROME_P450_ARRANGED_BY_SUBSTRATE_TYPE	36	1.29069	0.116981	0.717067
REACTOME_DOWNSTREAM_SIGNALING_OF_ACTIVATED_FGFR1	22	1.28614	0.143126	0.721938
REACTOME_VOLTAGE_GATED_POTASSIUM_CHANNELS	30	1.285	0.1417	0.713241
REACTOME_RND3_GTPASE_CYCLE	40	1.28456	0.107486	0.701839
REACTOME_ER_TO_GOLGI_ANTEROGRADE_TRANSPORT	139	1.28293	0.0604167	0.695542
REACTOME_VITAMIN_B5_PANTOTHENATE_METABOLISM	15	1.27765	0.191837	0.704222
REACTOME_G_ALPHA_S_SIGNALLING_EVENTS	82	1.2766	0.0939457	0.696213
REACTOME_ASPARAGINE_N_LINKED_GLYCOSYLATION	246	1.27583	0.0292887	0.687463
HALLMARK_UV_RESPONSE_DN	142	1.26883	0.0659134	0.703424
REACTOME_MOLECULES_ASSOCIATED_WITH_ELASTIC_FIBRES	31	1.2678	0.131429	0.695534
BIOCARTA_NFAT_PATHWAY	42	1.25582	0.151751	0.731232
REACTOME_SIGNALING_BY_TGFB_FAMILY_MEMBERS	99	1.25191	0.0800781	0.735162
REACTOME_TP53_REGULATES_TRANSCRIPTION_OF_CELL_DEATH_GENES	15	1.24408	0.213358	0.754516
REACTOME_COLLAGEN_BIOSYNTHESIS_AND_MODIFYING_ENZYMES	62	1.24359	0.126482	0.744777
REACTOME_BIOLOGICAL_OXIDATIONS	138	1.234	0.0819048	0.772926
REACTOME_BINDING_AND_UPTAKE_OF_LIGANDS_BY_SCAVENGER_RECEPTORS	29	1.23392	0.177388	0.76165
HALLMARK_EPITHELIAL_MESENCHYMAL_TRANSITION	189	1.2292	0.0699029	0.770119
REACTOME_ANTIGEN_PROCESSING_UBIQUITINATION_PROTEASOME_DEGRADATION	289	1.22848	0.0476191	0.761629
REACTOME_DOWNSTREAM_SIGNAL_TRANSDUCTION	27	1.22706	0.177515	0.756375
REACTOME_SIGNALING_BY_PDGF	52	1.22616	0.13834	0.749383
REACTOME_APOPTOTIC_EXECUTION_PHASE	46	1.22382	0.177481	0.748468
REACTOME_GOLGI_TO_ER_RETROGRADE_TRANSPORT	120	1.22359	0.102041	0.739136
REACTOME_FATTY_ACID_METABOLISM	137	1.22156	0.0916667	0.737072
REACTOME_NCAM1_INTERACTIONS	17	1.21841	0.206478	0.738996
REACTOME_CELL_CELL_COMMUNICATION	81	1.21826	0.11811	0.729826
REACTOME_ADHERENS_JUNCTIONS_INTERACTIONS	32	1.21596	0.180934	0.729274
HALLMARK_PROTEIN_SECRETION	92	1.21564	0.130081	0.721138
REACTOME_METABOLISM_OF_CARBOHYDRATES	249	1.19768	0.0875764	0.78098
REACTOME_RAF_ACTIVATION	35	1.19509	0.211694	0.781265
REACTOME_ORGANELLE_BIOGENESIS_AND_MAINTENANCE	200	1.19475	0.0922432	0.772885
BIOCARTA_NUCLEARRS_PATHWAY	20	1.18677	0.2393	0.793785
REACTOME_COPI_DEPENDENT_GOLGI_TO_ER_RETROGRADE_TRAFFIC	88	1.18295	0.169524	0.798948
REACTOME_INTRA_GOLGI_AND_RETROGRADE_GOLGI_TO_ER_TRAFFIC	174	1.18094	0.107075	0.797343
REACTOME_EXTRACELLULAR_MATRIX_ORGANIZATION	216	1.1698	0.114823	0.833528
REACTOME_SYNTHESIS_OF_PIPS_AT_THE_EARLY_ENDOSOME_MEMBRANE	15	1.16501	0.267068	0.843637
REACTOME_BLOOD_GROUP_SYSTEMS_BIOSYNTHESIS	16	1.16472	0.248016	0.835311
REACTOME_PEPTIDE_HORMONE_METABOLISM	45	1.16375	0.22	0.829739
REACTOME_EFFECTS_OF_PIP2_HYDROLYSIS	23	1.16247	0.268061	0.825896
REACTOME_SIALIC_ACID_METABOLISM	29	1.1575	0.232283	0.836597
REACTOME_DEGRADATION_OF_THE_EXTRACELLULAR_MATRIX	86	1.15431	0.190476	0.840656
REACTOME_ERK_MAPK_TARGETS	19	1.15408	0.273585	0.832404
REACTOME_RMTS_METHYLATE_HISTONE_ARGININES	47	1.15394	0.248134	0.824043
REACTOME_HYALURONAN_METABOLISM	17	1.15164	0.282565	0.824204
REACTOME_METABOLISM_OF_LIPIDS	498	1.14799	0.0635246	0.829985
BIOCARTA_CCR3_PATHWAY	18	1.14688	0.259481	0.825761
REACTOME_APOPTOTIC_CLEAVAGE_OF_CELLULAR_PROTEINS	35	1.14236	0.261224	0.835542
REACTOME_RHOJ_GTPASE_CYCLE	16	1.13865	0.297665	0.84144
REACTOME_ASSEMBLY_OF_COLLAGEN_FIBRILS_AND_OTHER_MULTIMERIC_STRUCTURES	45	1.13572	0.252066	0.844315
REACTOME_NERVOUS_SYSTEM_DEVELOPMENT	247	1.13354	0.15251	0.844367
REACTOME_RHOD_GTPASE_CYCLE	50	1.13098	0.258449	0.846015
REACTOME_KINESINS	49	1.12987	0.240816	0.8423
REACTOME_RHOA_GTPASE_CYCLE	138	1.12918	0.199588	0.836933
REACTOME_PI_METABOLISM	75	1.1283	0.247082	0.831971
REACTOME_GAB1_SIGNALOSOME	15	1.12723	0.310204	0.828268
REACTOME_MYOGENESIS	23	1.12243	0.284333	0.839109
REACTOME_GLYCOSPHINGOLIPID_CATABOLISM	30	1.11922	0.309381	0.843471
REACTOME_SIGNALING_BY_ACTIVIN	15	1.11321	0.332681	0.859695
REACTOME_METAL_ION_SLC_TRANSPORTERS	19	1.10389	0.323353	0.888275
REACTOME_COPI_INDEPENDENT_GOLGI_TO_ER_RETROGRADE_TRAFFIC	44	1.101	0.288462	0.892022
REACTOME_CARGO_CONCENTRATION_IN_THE_ER	29	1.09769	0.311609	0.897479
REACTOME_NEUROTRANSMITTER_RECEPTORS_AND_POSTSYNAPTIC_SIGNAL_TRANSMISSION	97	1.09692	0.261386	0.892463
REACTOME_PEROXISOMAL_LIPID_METABOLISM	23	1.09386	0.326172	0.896369
REACTOME_ACTIVATION_OF_MATRIX_METALLOPROTEINASES	19	1.09154	0.347826	0.898401
REACTOME_SENSORY_PERCEPTION	59	1.09044	0.28169	0.895146
HALLMARK_MITOTIC_SPINDLE	198	1.08536	0.255814	0.907925
REACTOME_COPII_MEDIATED_VESICLE_TRANSPORT	64	1.08524	0.309804	0.900609
REACTOME_CLASS_I_MHC_MEDIATED_ANTIGEN_PROCESSING_PRESENTATION	332	1.08163	0.234469	0.907531
REACTOME_NEURONAL_SYSTEM	231	1.0773	0.222	0.91728
BIOCARTA_CALCINEURIN_PATHWAY	17	1.07722	0.332677	0.909971
REACTOME_GLUCAGON_LIKE_PEPTIDE_1_GLP1_REGULATES_INSULIN_SECRETION	27	1.07647	0.335417	0.905329
REACTOME_RHOV_GTPASE_CYCLE	36	1.07252	0.339286	0.913758
HALLMARK_APICAL_JUNCTION	181	1.06986	0.279261	0.917207
REACTOME_VISUAL_PHOTOTRANSDUCTION	53	1.0684	0.327345	0.915811
REACTOME_MTOR_SIGNALLING	41	1.0677	0.35503	0.91128
REACTOME_NOTCH_HLH_TRANSCRIPTION_PATHWAY	22	1.06276	0.356725	0.923564
REACTOME_ARACHIDONIC_ACID_METABOLISM	41	1.05527	0.356863	0.947054
REACTOME_BIOSYNTHESIS_OF_THE_N_GLYCAN_PRECURSOR_DOLICHOL_LIPID_LINKED_OLIGOSACCHARIDE_LLO_AND_TRANSFER_TO_A_NASCENT_PROTEIN	67	1.05517	0.338809	0.940085
REACTOME_RND1_GTPASE_CYCLE	41	1.052	0.362782	0.945513
REACTOME_SIGNALING_BY_FGFR1	43	1.04998	0.371951	0.946439
REACTOME_RETROGRADE_TRANSPORT_AT_THE_TRANS_GOLGI_NETWORK	44	1.04773	0.403162	0.948461
REACTOME_KERATAN_SULFATE_KERATIN_METABOLISM	32	1.04341	0.374494	0.958044
REACTOME_DNA_DAMAGE_TELOMERE_STRESS_INDUCED_SENESCENCE	26	1.04339	0.39548	0.950954
REACTOME_SYNTHESIS_OF_BILE_ACIDS_AND_BILE_SALTS	22	1.04236	0.374245	0.94831
REACTOME_INSULIN_RECEPTOR_SIGNALLING_CASCADE	36	1.03263	0.396761	0.980552
BIOCARTA_HDAC_PATHWAY	22	1.03068	0.403922	0.980997
REACTOME_RAB_GERANYLGERANYLATION	57	1.03055	0.374765	0.974379
REACTOME_GAP_JUNCTION_ASSEMBLY	21	1.02924	0.409709	0.972568
BIOCARTA_IGF1MTOR_PATHWAY	18	1.02821	0.428295	0.969826
REACTOME_PARACETAMOL_ADME	19	1.02539	0.417939	0.973942
REACTOME_PYRUVATE_METABOLISM	22	1.02136	0.419103	0.983366
BIOCARTA_AGR_PATHWAY	30	1.02073	0.413793	0.97876
REACTOME_TRANSCRIPTIONAL_REGULATION_BY_THE_AP_2_TFAP2_FAMILY_OF_TRANSCRIPTION_FACTORS	17	1.0203	0.43346	0.973604
REACTOME_STIMULI_SENSING_CHANNELS	76	1.01857	0.420319	0.973569
REACTOME_RET_SIGNALING	35	1.01856	0.43301	0.966943
REACTOME_THE_PHOTOTRANSDUCTION_CASCADE	18	1.01846	0.448544	0.960786
REACTOME_FORMATION_OF_SENESCENCE_ASSOCIATED_HETEROCHROMATIN_FOCI_SAHF	15	1.01749	0.432892	0.957871
BIOCARTA_P53_PATHWAY	15	1.01494	0.440228	0.961308
BIOCARTA_GSK3_PATHWAY	20	1.00919	0.424362	0.976849
REACTOME_DOWNSTREAM_SIGNALING_OF_ACTIVATED_FGFR4	20	1.00741	0.453488	0.977264
REACTOME_CELL_DEATH_SIGNALLING_VIA_NRAGE_NRIF_AND_NADE	67	1.00468	0.458498	0.981434
REACTOME_POST_TRANSLATIONAL_MODIFICATION_SYNTHESIS_OF_GPI_ANCHORED_PROTEINS	61	1.0017	0.445545	0.986522
REACTOME_DOWNSTREAM_SIGNALING_OF_ACTIVATED_FGFR2	21	1.00087	0.458498	0.983246
REACTOME_GAP_JUNCTION_TRAFFICKING_AND_REGULATION	33	0.999046	0.44186	0.983921
REACTOME_IRS_MEDIATED_SIGNALLING	31	0.994642	0.478261	0.994069
REACTOME_O_LINKED_GLYCOSYLATION_OF_MUCINS	40	0.993356	0.46988	0.992674
REACTOME_G_ALPHA_12_13_SIGNALLING_EVENTS	70	0.991099	0.471483	0.994831
REACTOME_PHOSPHOLIPID_METABOLISM	175	0.982753	0.486869	1
REACTOME_POST_NMDA_RECEPTOR_ACTIVATION_EVENTS	16	0.976687	0.480545	1
REACTOME_METABOLISM_OF_STEROID_HORMONES	23	0.976429	0.494949	1
HALLMARK_FATTY_ACID_METABOLISM	143	0.975672	0.507071	1
REACTOME_VXPX_CARGO_TARGETING_TO_CILIUM	18	0.973109	0.46374	1
REACTOME_SYNTHESIS_OF_PIPS_AT_THE_PLASMA_MEMBRANE	50	0.972235	0.481781	1
REACTOME_SIGNALING_BY_ERBB4	33	0.971238	0.516981	1
REACTOME_NICOTINAMIDE_SALVAGING	17	0.968485	0.498127	1
REACTOME_SYNTHESIS_OF_SUBSTRATES_IN_N_GLYCAN_BIOSYTHESIS	56	0.96741	0.497018	1
REACTOME_SIGNALING_BY_TGF_BETA_RECEPTOR_COMPLEX	74	0.963237	0.531136	1
REACTOME_GLYCOSPHINGOLIPID_METABOLISM	40	0.96322	0.486869	1
REACTOME_REGULATION_OF_INSULIN_LIKE_GROWTH_FACTOR_IGF_TRANSPORT_AND_UPTAKE_BY_INSULIN_LIKE_GROWTH_FACTOR_BINDING_PROTEINS_IGFBPS	96	0.958456	0.543434	1
BIOCARTA_VDR_PATHWAY	22	0.95711	0.510557	1
REACTOME_SYNTHESIS_OF_VERY_LONG_CHAIN_FATTY_ACYL_COAS	17	0.952748	0.528046	1
REACTOME_CD28_DEPENDENT_PI3K_AKT_SIGNALING	22	0.95262	0.531716	1
REACTOME_SIGNALING_BY_TYPE_1_INSULIN_LIKE_GROWTH_FACTOR_1_RECEPTOR_IGF1R	36	0.947907	0.54771	1
REACTOME_FOXO_MEDIATED_TRANSCRIPTION	20	0.94648	0.526112	1
REACTOME_LDL_CLEARANCE	15	0.944266	0.53626	1
REACTOME_OPIOID_SIGNALLING	65	0.942856	0.582329	1
REACTOME_NEDDYLATION	219	0.942699	0.622309	1
REACTOME_GLUTATHIONE_CONJUGATION	31	0.941262	0.542533	1
REACTOME_CDC42_GTPASE_CYCLE	91	0.940383	0.580247	1
REACTOME_NCAM_SIGNALING_FOR_NEURITE_OUT_GROWTH	35	0.938832	0.579498	1
REACTOME_RHOQ_GTPASE_CYCLE	57	0.938196	0.56	1
REACTOME_COLLAGEN_DEGRADATION	42	0.93657	0.567194	1
REACTOME_PKA_MEDIATED_PHOSPHORYLATION_OF_CREB	16	0.936353	0.540918	1
BIOCARTA_RHO_PATHWAY	20	0.934472	0.580038	1
HALLMARK_PANCREAS_BETA_CELLS	21	0.932814	0.584711	1
REACTOME_FRS_MEDIATED_FGFR4_SIGNALING	15	0.932621	0.543651	1
REACTOME_SIGNALING_BY_NTRKS	73	0.930997	0.612648	1
REACTOME_CLASS_B_2_SECRETIN_FAMILY_RECEPTORS	32	0.930905	0.561404	1
REACTOME_DISASSEMBLY_OF_THE_DESTRUCTION_COMPLEX_AND_RECRUITMENT_OF_AXIN_TO_THE_MEMBRANE	26	0.930598	0.57515	1
REACTOME_TRIGLYCERIDE_METABOLISM	15	0.929269	0.552846	1
HALLMARK_MYOGENESIS	193	0.928129	0.656566	1
REACTOME_EPH_EPHRIN_MEDIATED_REPULSION_OF_CELLS	30	0.926782	0.572534	1
REACTOME_RECRUITMENT_OF_NUMA_TO_MITOTIC_CENTROSOMES	85	0.925735	0.615385	1
REACTOME_PI_3K_CASCADE_FGFR2	15	0.92348	0.598441	1
REACTOME_N_GLYCAN_ANTENNAE_ELONGATION_IN_THE_MEDIAL_TRANS_GOLGI	21	0.922694	0.581921	1
REACTOME_CHONDROITIN_SULFATE_BIOSYNTHESIS	17	0.921593	0.546332	1
REACTOME_CARDIAC_CONDUCTION	84	0.919212	0.644898	1
REACTOME_TGF_BETA_RECEPTOR_SIGNALING_ACTIVATES_SMADS	38	0.918394	0.611538	1
REACTOME_AMINE_LIGAND_BINDING_RECEPTORS	18	0.918235	0.586345	1
REACTOME_G_PROTEIN_MEDIATED_EVENTS	38	0.916572	0.59252	1
HALLMARK_WNT_BETA_CATENIN_SIGNALING	40	0.912194	0.606362	1
REACTOME_CYTOPROTECTION_BY_HMOX1	48	0.910659	0.612841	1
REACTOME_TRAFFICKING_OF_GLUR2_CONTAINING_AMPA_RECEPTORS	15	0.910168	0.563492	1
REACTOME_FRS_MEDIATED_FGFR2_SIGNALING	16	0.908155	0.570076	1
HALLMARK_GLYCOLYSIS	190	0.904818	0.717694	1
REACTOME_SUMOYLATION_OF_INTRACELLULAR_RECEPTORS	23	0.898556	0.594796	1
REACTOME_NICOTINATE_METABOLISM	29	0.898492	0.61144	1
REACTOME_ISG15_ANTIVIRAL_MECHANISM	27	0.897453	0.632184	1
REACTOME_P75_NTR_RECEPTOR_MEDIATED_SIGNALLING	81	0.895459	0.691684	1
BIOCARTA_GPCR_PATHWAY	28	0.891147	0.654902	1
REACTOME_RND2_GTPASE_CYCLE	42	0.888457	0.646943	1
REACTOME_INTEGRATION_OF_ENERGY_METABOLISM	70	0.887829	0.673469	1
REACTOME_AQUAPORIN_MEDIATED_TRANSPORT	32	0.885908	0.638889	1
BIOCARTA_INSULIN_PATHWAY	22	0.882924	0.60479	1
REACTOME_SULFUR_AMINO_ACID_METABOLISM	21	0.880841	0.63039	1
HALLMARK_TGF_BETA_SIGNALING	53	0.877786	0.678643	1
REACTOME_NEGATIVE_REGULATION_OF_THE_PI3K_AKT_NETWORK	92	0.875374	0.737705	1
REACTOME_RHO_GTPASE_CYCLE	408	0.874333	0.898129	1
REACTOME_SYNTHESIS_OF_PC	23	0.869881	0.657258	1
BIOCARTA_TFF_PATHWAY	22	0.869607	0.665414	1
BIOCARTA_LONGEVITY_PATHWAY	15	0.86805	0.630137	1
REACTOME_SIGNALING_BY_PTK6	46	0.86678	0.687129	1
REACTOME_ACYL_CHAIN_REMODELLING_OF_PS	17	0.86416	0.626459	1
REACTOME_MHC_CLASS_II_ANTIGEN_PRESENTATION	106	0.859374	0.796875	1
REACTOME_PURINE_CATABOLISM	17	0.857102	0.655706	1
REACTOME_MAPK_TARGETS_NUCLEAR_EVENTS_MEDIATED_BY_MAP_KINASES	27	0.853668	0.651303	1
REACTOME_SIGNALING_BY_WNT	218	0.853153	0.856311	1
REACTOME_GABA_B_RECEPTOR_ACTIVATION	36	0.850163	0.705757	1
REACTOME_DRUG_ADME	59	0.848159	0.769674	1
HALLMARK_ADIPOGENESIS	200	0.847976	0.867347	1
BIOCARTA_MTOR_PATHWAY	19	0.846094	0.673077	1
REACTOME_CA_DEPENDENT_EVENTS	26	0.845355	0.68431	1
REACTOME_FACTORS_INVOLVED_IN_MEGAKARYOCYTE_DEVELOPMENT_AND_PLATELET_PRODUCTION	115	0.844205	0.825301	1
REACTOME_SIGNALING_BY_FGFR	68	0.843574	0.772824	1
REACTOME_ION_HOMEOSTASIS	50	0.839324	0.745833	1
REACTOME_GLYCOGEN_METABOLISM	18	0.838399	0.69917	1
HALLMARK_ESTROGEN_RESPONSE_EARLY	173	0.838003	0.861224	1
REACTOME_ENERGY_DEPENDENT_REGULATION_OF_MTOR_BY_LKB1_AMPK	29	0.836398	0.729885	1
REACTOME_RHOF_GTPASE_CYCLE	40	0.832786	0.770021	1
REACTOME_GABA_RECEPTOR_ACTIVATION	40	0.832775	0.766537	1
REACTOME_ION_TRANSPORT_BY_P_TYPE_ATPASES	47	0.831614	0.784884	1
REACTOME_ECM_PROTEOGLYCANS	46	0.822143	0.792969	1
BIOCARTA_NOS1_PATHWAY	16	0.817668	0.724584	1
BIOCARTA_MEF2D_PATHWAY	15	0.814439	0.712621	1
REACTOME_POTASSIUM_CHANNELS	73	0.810214	0.821285	1
BIOCARTA_TGFB_PATHWAY	17	0.803771	0.735409	1
HALLMARK_COAGULATION	105	0.803577	0.869739	1
REACTOME_L1CAM_INTERACTIONS	63	0.802711	0.846311	1
REACTOME_SYNTHESIS_OF_IP3_AND_IP4_IN_THE_CYTOSOL	26	0.801654	0.745902	1
HALLMARK_PEROXISOME	89	0.798054	0.902344	1
REACTOME_TRAFFICKING_OF_AMPA_RECEPTORS	25	0.797887	0.784884	1
REACTOME_MTORC1_MEDIATED_SIGNALLING	24	0.797594	0.780488	1
REACTOME_GLUCONEOGENESIS	32	0.797113	0.788679	1
REACTOME_TRP_CHANNELS	22	0.795947	0.75283	1
REACTOME_TRANS_GOLGI_NETWORK_VESICLE_BUDDING	66	0.794346	0.845691	1
REACTOME_GLYCEROPHOSPHOLIPID_BIOSYNTHESIS	101	0.787164	0.909465	1
REACTOME_MITOCHONDRIAL_CALCIUM_ION_TRANSPORT	17	0.785898	0.807767	1
REACTOME_DARPP_32_EVENTS	17	0.785741	0.796844	1
REACTOME_INTERLEUKIN_6_FAMILY_SIGNALING	20	0.779369	0.786448	1
BIOCARTA_EGF_PATHWAY	28	0.779143	0.823293	1
REACTOME_SIGNALLING_TO_ERKS	25	0.776317	0.803089	1
REACTOME_AURKA_ACTIVATION_BY_TPX2	70	0.774165	0.884381	1
REACTOME_SIGNALING_BY_HEDGEHOG	132	0.767299	0.958246	1
REACTOME_TGF_BETA_RECEPTOR_SIGNALING_IN_EMT_EPITHELIAL_TO_MESENCHYMAL_TRANSITION	16	0.764329	0.816406	1
REACTOME_RECYCLING_PATHWAY_OF_L1	32	0.756218	0.840726	1
REACTOME_RAB_REGULATION_OF_TRAFFICKING	111	0.753082	0.938247	1
REACTOME_NETRIN_1_SIGNALING	19	0.746365	0.803313	1
BIOCARTA_IGF1_PATHWAY	22	0.743268	0.842912	1
REACTOME_INITIAL_TRIGGERING_OF_COMPLEMENT	16	0.741674	0.842718	1
REACTOME_MET_PROMOTES_CELL_MOTILITY	32	0.740009	0.885932	1
REACTOME_REGULATION_OF_INSULIN_SECRETION	55	0.73858	0.924051	1
REACTOME_RAB_GEFS_EXCHANGE_GTP_FOR_GDP_ON_RABS	86	0.727682	0.941909	1
REACTOME_RHOU_GTPASE_CYCLE	39	0.719682	0.917323	1
REACTOME_SIGNALING_BY_ERBB2	43	0.719579	0.921305	1
REACTOME_METABOLISM_OF_STEROIDS	85	0.717243	0.958743	1
REACTOME_CARBOXYTERMINAL_POST_TRANSLATIONAL_MODIFICATIONS_OF_TUBULIN	19	0.713866	0.854508	1
REACTOME_EXTRA_NUCLEAR_ESTROGEN_SIGNALING	61	0.713078	0.929719	1
BIOCARTA_GH_PATHWAY	26	0.712583	0.882937	1
REACTOME_CTLA4_INHIBITORY_SIGNALING	21	0.711272	0.880716	1
REACTOME_SPHINGOLIPID_METABOLISM	72	0.708585	0.968128	1
REACTOME_AGGREPHAGY	31	0.700853	0.911025	1
REACTOME_KERATAN_SULFATE_BIOSYNTHESIS	25	0.700745	0.878099	1
REACTOME_FANCONI_ANEMIA_PATHWAY	37	0.697492	0.911243	1
REACTOME_AMINO_ACIDS_REGULATE_MTORC1	52	0.693854	0.952381	1
REACTOME_GPER1_SIGNALING	25	0.6918	0.904483	1
REACTOME_MACROAUTOPHAGY	115	0.689951	0.986616	1
BIOCARTA_INTEGRIN_PATHWAY	33	0.68675	0.916981	1
REACTOME_SIGNALING_BY_NTRK1_TRKA	61	0.68353	0.954183	1
REACTOME_BILE_ACID_AND_BILE_SALT_METABOLISM	26	0.682738	0.928846	1
REACTOME_GOLGI_ASSOCIATED_VESICLE_BIOGENESIS	52	0.677841	0.960452	1
BIOCARTA_BARRESTIN_SRC_PATHWAY	16	0.674008	0.908549	1
REACTOME_PLATELET_HOMEOSTASIS	71	0.671588	0.978682	1
REACTOME_PYRUVATE_METABOLISM_AND_CITRIC_ACID_TCA_CYCLE	46	0.671022	0.958071	1
REACTOME_CD28_CO_STIMULATION	33	0.66999	0.921201	1
REACTOME_CA2_PATHWAY	40	0.666967	0.960239	1
REACTOME_RHO_GTPASES_ACTIVATE_IQGAPS	26	0.666482	0.938559	1
REACTOME_GLYOXYLATE_METABOLISM_AND_GLYCINE_DEGRADATION	24	0.66444	0.929254	1
REACTOME_SIGNALING_BY_HIPPO	20	0.66195	0.924335	1
REACTOME_DOWNSTREAM_SIGNALING_OF_ACTIVATED_FGFR3	18	0.656222	0.915058	1
BIOCARTA_PDGF_PATHWAY	29	0.652659	0.950397	1
REACTOME_BETA_CATENIN_PHOSPHORYLATION_CASCADE	17	0.650322	0.911067	1
REACTOME_HEDGEHOG_ON_STATE	80	0.649981	0.978346	1
REACTOME_INTRA_GOLGI_TRAFFIC	34	0.648481	0.971429	1
BIOCARTA_MTA3_PATHWAY	18	0.648466	0.933206	1
REACTOME_EPH_EPHRIN_SIGNALING	59	0.642769	0.973737	1
BIOCARTA_RAS_PATHWAY	21	0.642543	0.929273	1
REACTOME_VEGFR2_MEDIATED_VASCULAR_PERMEABILITY	29	0.635457	0.949248	1
REACTOME_TBC_RABGAPS	33	0.634459	0.96063	1
REACTOME_FORMATION_OF_THE_EARLY_ELONGATION_COMPLEX	32	0.626752	0.967936	1
REACTOME_RHOH_GTPASE_CYCLE	34	0.617485	0.976923	1
REACTOME_MRNA_CAPPING	28	0.612031	0.973684	1
BIOCARTA_MAL_PATHWAY	17	0.610346	0.944123	1
REACTOME_APOPTOSIS	99	0.606258	0.996146	1
REACTOME_SPHINGOLIPID_DE_NOVO_BIOSYNTHESIS	20	0.60289	0.948718	1
REACTOME_INSERTION_OF_TAIL_ANCHORED_PROTEINS_INTO_THE_ENDOPLASMIC_RETICULUM_MEMBRANE	15	0.602388	0.945996	1
BIOCARTA_EPO_PATHWAY	19	0.595485	0.965714	1
REACTOME_GENE_SILENCING_BY_RNA	40	0.593005	0.973577	1
REACTOME_NUCLEOTIDE_CATABOLISM	30	0.590248	0.986355	1
REACTOME_ANCHORING_OF_THE_BASAL_BODY_TO_THE_PLASMA_MEMBRANE	95	0.589641	1	1
REACTOME_TIE2_SIGNALING	17	0.58414	0.952174	1
BIOCARTA_NGF_PATHWAY	19	0.564898	0.974104	1
REACTOME_TRANSCRIPTIONAL_REGULATION_BY_SMALL_RNAS	32	0.562748	0.992141	1
REACTOME_GLUCOSE_METABOLISM	76	0.562648	0.997959	1
BIOCARTA_GCR_PATHWAY	15	0.527239	0.980916	1
REACTOME_MET_ACTIVATES_PTK2_SIGNALING	21	0.514695	0.992	1
REACTOME_METABOLISM_OF_COFACTORS	15	0.512429	0.981238	1
BIOCARTA_EIF4_PATHWAY	21	0.503655	0.996132	1
REACTOME_REGULATION_OF_PLK1_ACTIVITY_AT_G2_M_TRANSITION	85	0.498535	1	1
REACTOME_SEALING_OF_THE_NUCLEAR_ENVELOPE_NE_BY_ESCRT_III	23	0.485389	0.998035	1
REACTOME_EPHRIN_SIGNALING	18	0.481475	0.994118	1
BIOCARTA_EDG1_PATHWAY	20	0.474111	0.997984	1
REACTOME_MITOTIC_PROMETAPHASE	189	0.472295	1	1
BIOCARTA_FAS_PATHWAY	28	0.462073	0.994036	0.998129

## Sheet: gsea_STINGvsMSC
NAME	SIZE	NES	NOM p-val	FDR q-val
HALLMARK_EPITHELIAL_MESENCHYMAL_TRANSITION	189	-3.05458	0	0
REACTOME_COLLAGEN_FORMATION	73	-2.90474	0	0
REACTOME_COLLAGEN_BIOSYNTHESIS_AND_MODIFYING_ENZYMES	62	-2.85738	0	0
HALLMARK_TNFA_SIGNALING_VIA_NFKB	188	-2.8184	0	0
REACTOME_EXTRACELLULAR_MATRIX_ORGANIZATION	216	-2.77698	0	0
REACTOME_COLLAGEN_CHAIN_TRIMERIZATION	35	-2.5938	0	0
REACTOME_ASSEMBLY_OF_COLLAGEN_FIBRILS_AND_OTHER_MULTIMERIC_STRUCTURES	45	-2.57167	0	0
REACTOME_ELASTIC_FIBRE_FORMATION	38	-2.37518	0	0
REACTOME_COLLAGEN_DEGRADATION	42	-2.37507	0	0
REACTOME_DEGRADATION_OF_THE_EXTRACELLULAR_MATRIX	86	-2.37263	0	0
REACTOME_NON_INTEGRIN_MEMBRANE_ECM_INTERACTIONS	30	-2.33438	0	0
REACTOME_INTEGRIN_CELL_SURFACE_INTERACTIONS	68	-2.27864	0	0
REACTOME_ECM_PROTEOGLYCANS	46	-2.26388	0	6.85e-05
REACTOME_MOLECULES_ASSOCIATED_WITH_ELASTIC_FIBRES	31	-2.1996	0	0.000195
REACTOME_FORMATION_OF_THE_CORNIFIED_ENVELOPE	36	-2.19887	0	0.000182
REACTOME_CROSSLINKING_OF_COLLAGEN_FIBRILS	15	-2.17932	0	0.00017
REACTOME_KERATINIZATION	36	-2.13538	0	0.000267
REACTOME_SIGNALING_BY_PDGF	52	-2.13034	0	0.000304
HALLMARK_ANGIOGENESIS	34	-2.09394	0	0.000923
HALLMARK_HYPOXIA	189	-2.09206	0	0.000877
HALLMARK_TGF_BETA_SIGNALING	53	-2.01234	0	0.00263677
REACTOME_O_GLYCOSYLATION_OF_TSR_DOMAIN_CONTAINING_PROTEINS	36	-1.99778	0.00174216	0.00343559
HALLMARK_CHOLESTEROL_HOMEOSTASIS	70	-1.96537	0	0.00552091
REACTOME_MET_ACTIVATES_PTK2_SIGNALING	21	-1.92617	0.00185185	0.00882355
REACTOME_EPH_EPHRIN_MEDIATED_REPULSION_OF_CELLS	30	-1.91936	0.00182149	0.00946559
REACTOME_ACTIVATION_OF_MATRIX_METALLOPROTEINASES	19	-1.90398	0.00350877	0.0113215
HALLMARK_IL2_STAT5_SIGNALING	191	-1.88288	0	0.0143074
REACTOME_NCAM1_INTERACTIONS	17	-1.83244	0.00564972	0.0242313
REACTOME_EPHRIN_SIGNALING	18	-1.82427	0.00180505	0.025481
HALLMARK_KRAS_SIGNALING_UP	181	-1.80476	0	0.0310337
REACTOME_EPH_EPHRIN_SIGNALING	59	-1.79844	0.00352734	0.0320433
REACTOME_THROMBOXANE_SIGNALLING_THROUGH_TP_RECEPTOR	21	-1.77097	0.00544465	0.040989
HALLMARK_COAGULATION	105	-1.76228	0.00165837	0.0435954
REACTOME_REGULATION_OF_INSULIN_LIKE_GROWTH_FACTOR_IGF_TRANSPORT_AND_UPTAKE_BY_INSULIN_LIKE_GROWTH_FACTOR_BINDING_PROTEINS_IGFBPS	96	-1.76052	0	0.042964
HALLMARK_APOPTOSIS	155	-1.75573	0	0.0437338
REACTOME_GPER1_SIGNALING	25	-1.75483	0.00574713	0.0428273
HALLMARK_P53_PATHWAY	195	-1.75376	0	0.0420964
REACTOME_EPHB_MEDIATED_FORWARD_SIGNALING	35	-1.7404	0	0.0467127
REACTOME_TGF_BETA_RECEPTOR_SIGNALING_IN_EMT_EPITHELIAL_TO_MESENCHYMAL_TRANSITION	16	-1.73869	0.00547445	0.0461391
HALLMARK_INFLAMMATORY_RESPONSE	180	-1.73401	0	0.046835
HALLMARK_ESTROGEN_RESPONSE_LATE	170	-1.71729	0	0.0545745
REACTOME_GLYCOSAMINOGLYCAN_METABOLISM	111	-1.71141	0	0.0562128
HALLMARK_APICAL_JUNCTION	181	-1.70644	0	0.0578152
REACTOME_GAP_JUNCTION_TRAFFICKING_AND_REGULATION	33	-1.70637	0.0110294	0.0565626
REACTOME_MET_PROMOTES_CELL_MOTILITY	32	-1.70462	0.00185529	0.0563673
REACTOME_DEVELOPMENTAL_BIOLOGY	328	-1.68303	0	0.067621
REACTOME_CELL_SURFACE_INTERACTIONS_AT_THE_VASCULAR_WALL	86	-1.67331	0.00335571	0.0724301
REACTOME_ONCOGENE_INDUCED_SENESCENCE	17	-1.66624	0.0204461	0.0751967
BIOCARTA_VIP_PATHWAY	23	-1.65811	0.0159858	0.0789387
HALLMARK_ESTROGEN_RESPONSE_EARLY	173	-1.63965	0	0.0910465
REACTOME_O_LINKED_GLYCOSYLATION	84	-1.6374	0.00161551	0.0910781
REACTOME_CHONDROITIN_SULFATE_BIOSYNTHESIS	17	-1.63704	0.0145191	0.0898108
REACTOME_SIGNALING_BY_RECEPTOR_TYROSINE_KINASES	378	-1.62711	0	0.0958322
REACTOME_TGF_BETA_RECEPTOR_SIGNALING_ACTIVATES_SMADS	38	-1.62369	0.00863558	0.0966929
REACTOME_INSULIN_RECEPTOR_RECYCLING	26	-1.61395	0.0160142	0.103379
REACTOME_VASOPRESSIN_REGULATES_RENAL_WATER_HOMEOSTASIS_VIA_AQUAPORINS	27	-1.59215	0.0238908	0.120798
REACTOME_A_TETRASACCHARIDE_LINKER_SEQUENCE_IS_REQUIRED_FOR_GAG_SYNTHESIS	21	-1.58196	0.0253165	0.129122
REACTOME_SIGNALING_BY_TGFB_FAMILY_MEMBERS	99	-1.57923	0.00668896	0.12974
REACTOME_CHONDROITIN_SULFATE_DERMATAN_SULFATE_METABOLISM	44	-1.57757	0.0245902	0.129224
REACTOME_EGFR_DOWNREGULATION	29	-1.57741	0.0254545	0.127164
BIOCARTA_EICOSANOID_PATHWAY	20	-1.56117	0.0265655	0.142264
REACTOME_SIGNAL_AMPLIFICATION	29	-1.5582	0.030303	0.143343
REACTOME_HEPARAN_SULFATE_HEPARIN_HS_GAG_METABOLISM	46	-1.55322	0.0125673	0.146315
BIOCARTA_TNFR2_PATHWAY	17	-1.55153	0.0351852	0.146075
REACTOME_DOWNSTREAM_SIGNALING_OF_ACTIVATED_FGFR3	18	-1.53964	0.0421245	0.157822
REACTOME_PRESYNAPTIC_FUNCTION_OF_KAINATE_RECEPTORS	17	-1.52994	0.0482375	0.167628
REACTOME_GPCR_LIGAND_BINDING	225	-1.5265	0.005997	0.169399
REACTOME_SIGNALING_BY_MET	66	-1.52132	0.00677966	0.173976
REACTOME_NCAM_SIGNALING_FOR_NEURITE_OUT_GROWTH	35	-1.52109	0.0262238	0.171721
REACTOME_GAP_JUNCTION_ASSEMBLY	21	-1.5131	0.0323741	0.17882
REACTOME_ACTIVATION_OF_KAINATE_RECEPTORS_UPON_GLUTAMATE_BINDING	25	-1.50335	0.040293	0.189601
REACTOME_EXTRA_NUCLEAR_ESTROGEN_SIGNALING	61	-1.50323	0.0142857	0.187095
REACTOME_POTASSIUM_CHANNELS	73	-1.50083	0.025	0.187592
REACTOME_INTERLEUKIN_6_FAMILY_SIGNALING	20	-1.50054	0.0569853	0.185581
HALLMARK_WNT_BETA_CATENIN_SIGNALING	40	-1.49895	0.027027	0.185127
REACTOME_CELL_CELL_COMMUNICATION	81	-1.49027	0.0146341	0.194254
REACTOME_REGULATION_OF_FZD_BY_UBIQUITINATION	20	-1.48862	0.0503731	0.19385
BIOCARTA_NTHI_PATHWAY	22	-1.48286	0.0658915	0.199716
REACTOME_CLASS_A_1_RHODOPSIN_LIKE_RECEPTORS	185	-1.48108	0.00607903	0.199795
REACTOME_SIGNALING_BY_RETINOIC_ACID	34	-1.4793	0.0328467	0.199964
REACTOME_RND1_GTPASE_CYCLE	41	-1.47802	0.0218978	0.199219
REACTOME_CTLA4_INHIBITORY_SIGNALING	21	-1.47658	0.0677362	0.198861
REACTOME_PROSTACYCLIN_SIGNALLING_THROUGH_PROSTACYCLIN_RECEPTOR	16	-1.4765	0.0546737	0.196587
REACTOME_NONSENSE_MEDIATED_DECAY_NMD_INDEPENDENT_OF_THE_EXON_JUNCTION_COMPLEX_EJC	94	-1.47483	0.0149254	0.196397
REACTOME_PLASMA_LIPOPROTEIN_REMODELING	18	-1.46805	0.0580986	0.203269
REACTOME_G_ALPHA_Q_SIGNALLING_EVENTS	149	-1.46355	0.00903614	0.207605
REACTOME_SIGNALING_BY_NOTCH	39	-1.46148	0.0452261	0.207904
HALLMARK_UV_RESPONSE_DN	142	-1.45527	0.00472441	0.21369
REACTOME_SIGNALING_BY_VEGF	100	-1.45112	0.0206677	0.217406
REACTOME_CELL_JUNCTION_ORGANIZATION	64	-1.44816	0.0177134	0.219469
REACTOME_NERVOUS_SYSTEM_DEVELOPMENT	247	-1.44443	0.00592593	0.222586
REACTOME_KERATAN_SULFATE_KERATIN_METABOLISM	32	-1.44083	0.0531136	0.225517
REACTOME_VOLTAGE_GATED_POTASSIUM_CHANNELS	30	-1.43464	0.0485269	0.23292
REACTOME_AQUAPORIN_MEDIATED_TRANSPORT	32	-1.43259	0.0705244	0.233771
REACTOME_G_PROTEIN_ACTIVATION	19	-1.41911	0.073741	0.252598
HALLMARK_UV_RESPONSE_UP	146	-1.41643	0.0110585	0.254234
REACTOME_ADP_SIGNALLING_THROUGH_P2Y_PURINOCEPTOR_12	18	-1.41603	0.0783242	0.25237
REACTOME_GLUTAMATE_NEUROTRANSMITTER_RELEASE_CYCLE	16	-1.41351	0.0845588	0.254098
REACTOME_ADP_SIGNALLING_THROUGH_P2Y_PURINOCEPTOR_1	22	-1.41125	0.0761062	0.25556
BIOCARTA_41BB_PATHWAY	16	-1.40643	0.0818182	0.261601
REACTOME_SIGNALING_BY_TGF_BETA_RECEPTOR_COMPLEX	74	-1.40617	0.05	0.259543
REACTOME_RND3_GTPASE_CYCLE	40	-1.40165	0.0696921	0.26456
BIOCARTA_CARDIACEGF_PATHWAY	17	-1.39735	0.104015	0.269458
REACTOME_KERATAN_SULFATE_BIOSYNTHESIS	25	-1.39684	0.0880734	0.267726
BIOCARTA_ETS_PATHWAY	17	-1.39108	0.0958409	0.27557
REACTOME_SIGNALING_BY_HIPPO	20	-1.39043	0.0920139	0.27408
REACTOME_CELL_CELL_JUNCTION_ORGANIZATION	40	-1.37938	0.0789474	0.291082
REACTOME_SMOOTH_MUSCLE_CONTRACTION	31	-1.37866	0.0834813	0.289866
REACTOME_ADRENALINE_NORADRENALINE_INHIBITS_INSULIN_SECRETION	20	-1.37828	0.0946429	0.288015
REACTOME_DOWNSTREAM_SIGNAL_TRANSDUCTION	27	-1.37273	0.0881801	0.29532
REACTOME_TNF_RECEPTOR_SUPERFAMILY_TNFSF_MEMBERS_MEDIATING_NON_CANONICAL_NF_KB_PATHWAY	16	-1.37224	0.0917603	0.293515
BIOCARTA_RELA_PATHWAY	15	-1.37074	0.125912	0.293618
REACTOME_SIGNALING_BY_EGFR	44	-1.36821	0.0788091	0.295949
REACTOME_CA2_PATHWAY	40	-1.36797	0.0830325	0.293846
REACTOME_GLUCAGON_LIKE_PEPTIDE_1_GLP1_REGULATES_INSULIN_SECRETION	27	-1.35561	0.106884	0.31426
REACTOME_SIGNALING_BY_SCF_KIT	36	-1.35353	0.0924657	0.31553
REACTOME_RESPONSE_TO_ELEVATED_PLATELET_CYTOSOLIC_CA2	114	-1.35323	0.0339506	0.313435
BIOCARTA_TGFB_PATHWAY	17	-1.34789	0.130354	0.320935
REACTOME_P75NTR_SIGNALS_VIA_NF_KB	17	-1.34715	0.139405	0.319866
REACTOME_SIGNALING_BY_BMP	28	-1.3348	0.0879121	0.342721
BIOCARTA_CDMAC_PATHWAY	15	-1.33173	0.1569	0.346419
REACTOME_REGULATION_OF_INSULIN_SECRETION	55	-1.32883	0.0584307	0.349512
REACTOME_SIGNALING_BY_NOTCH1	19	-1.32365	0.129496	0.357239
HALLMARK_IL6_JAK_STAT3_SIGNALING	80	-1.32251	0.0706436	0.356726
HALLMARK_NOTCH_SIGNALING	32	-1.31836	0.10566	0.362418
BIOCARTA_IL6_PATHWAY	22	-1.31719	0.134892	0.362498
REACTOME_ACTIVATION_OF_BH3_ONLY_PROTEINS	18	-1.31572	0.162544	0.362633
REACTOME_G_ALPHA_I_SIGNALLING_EVENTS	183	-1.31484	0.0412844	0.361682
REACTOME_RAC1_GTPASE_CYCLE	167	-1.30755	0.0532446	0.37485
REACTOME_NRIF_SIGNALS_CELL_DEATH_FROM_THE_NUCLEUS	15	-1.30202	0.166362	0.384247
BIOCARTA_BCELLSURVIVAL_PATHWAY	16	-1.30185	0.148746	0.381657
REACTOME_G_BETA_GAMMA_SIGNALLING_THROUGH_CDC42	17	-1.29009	0.162162	0.405313
REACTOME_ENDOGENOUS_STEROLS	20	-1.28985	0.149281	0.402841
REACTOME_SIGNALING_BY_INSULIN_RECEPTOR	61	-1.28702	0.100993	0.406439
REACTOME_NONSENSE_MEDIATED_DECAY_NMD	114	-1.28272	0.0749601	0.41374
REACTOME_TRANSFERRIN_ENDOCYTOSIS_AND_RECYCLING	28	-1.28225	0.143617	0.411646
REACTOME_G_ALPHA_Z_SIGNALLING_EVENTS	27	-1.28151	0.15	0.41057
REACTOME_CHAPERONIN_MEDIATED_PROTEIN_FOLDING	36	-1.27589	0.135088	0.420523
REACTOME_CYTOCHROME_P450_ARRANGED_BY_SUBSTRATE_TYPE	36	-1.27257	0.132143	0.425469
REACTOME_CLASS_B_2_SECRETIN_FAMILY_RECEPTORS	32	-1.26703	0.134354	0.435516
REACTOME_DEACTIVATION_OF_THE_BETA_CATENIN_TRANSACTIVATING_COMPLEX	31	-1.25899	0.150943	0.451377
REACTOME_CASPASE_ACTIVATION_VIA_DEATH_RECEPTORS_IN_THE_PRESENCE_OF_LIGAND	15	-1.25571	0.169039	0.456421
REACTOME_TIE2_SIGNALING	17	-1.25209	0.173913	0.462202
REACTOME_PLATELET_ACTIVATION_SIGNALING_AND_AGGREGATION	232	-1.25019	0.0508721	0.463488
REACTOME_SIGNALING_BY_FGFR3	34	-1.24809	0.165493	0.465311
REACTOME_DOWNREGULATION_OF_TGF_BETA_RECEPTOR_SIGNALING	17	-1.24473	0.205882	0.470224
REACTOME_SIGNALING_BY_GPCR	420	-1.24458	0.0354223	0.46736
REACTOME_RHO_GTPASE_CYCLE	408	-1.24241	0.0488827	0.469945
REACTOME_INTRAFLAGELLAR_TRANSPORT	48	-1.24208	0.149007	0.467611
REACTOME_TNFS_BIND_THEIR_PHYSIOLOGICAL_RECEPTORS	23	-1.24144	0.186207	0.466101
REACTOME_METABOLISM_OF_FAT_SOLUBLE_VITAMINS	27	-1.23857	0.175047	0.469774
BIOCARTA_ARENRF2_PATHWAY	18	-1.23046	0.209174	0.487882
BIOCARTA_TOB1_PATHWAY	17	-1.22928	0.203152	0.4877
REACTOME_ACTIVATION_OF_G_PROTEIN_GATED_POTASSIUM_CHANNELS	24	-1.22893	0.204626	0.485404
REACTOME_CASPASE_ACTIVATION_VIA_EXTRINSIC_APOPTOTIC_SIGNALLING_PATHWAY	18	-1.22728	0.198131	0.486359
HALLMARK_ALLOGRAFT_REJECTION	177	-1.22198	0.0990712	0.496369
REACTOME_HEMOSTASIS	468	-1.22035	0.0554054	0.497012
REACTOME_DOPAMINE_NEUROTRANSMITTER_RELEASE_CYCLE	18	-1.21241	0.216931	0.514631
HALLMARK_APICAL_SURFACE	40	-1.20856	0.177172	0.521771
REACTOME_HSP90_CHAPERONE_CYCLE_FOR_STEROID_HORMONE_RECEPTORS_SHR_IN_THE_PRESENCE_OF_LIGAND	47	-1.20222	0.1883	0.534978
REACTOME_HS_GAG_BIOSYNTHESIS	24	-1.20166	0.220803	0.533251
REACTOME_N_GLYCAN_ANTENNAE_ELONGATION_IN_THE_MEDIAL_TRANS_GOLGI	21	-1.19923	0.239209	0.536478
BIOCARTA_IL1R_PATHWAY	29	-1.19829	0.206831	0.535746
REACTOME_THROMBIN_SIGNALLING_THROUGH_PROTEINASE_ACTIVATED_RECEPTORS_PARS	28	-1.19304	0.208711	0.54736
BIOCARTA_CTCF_PATHWAY	24	-1.19132	0.200368	0.549128
REACTOME_G_ALPHA_S_SIGNALLING_EVENTS	82	-1.18604	0.172414	0.560478
REACTOME_RHO_GTPASES_ACTIVATE_WASPS_AND_WAVES	32	-1.18351	0.209559	0.563916
BIOCARTA_IL2RB_PATHWAY	36	-1.17929	0.213542	0.572516
REACTOME_METABOLISM_OF_STEROID_HORMONES	23	-1.17251	0.250883	0.588396
REACTOME_SIGNALING_BY_PTK6	46	-1.17144	0.225524	0.588008
REACTOME_NEURONAL_SYSTEM	231	-1.16995	0.143075	0.588997
REACTOME_IRON_UPTAKE_AND_TRANSPORT	52	-1.16652	0.214035	0.595422
REACTOME_G_BETA_GAMMA_SIGNALLING_THROUGH_PI3KGAMMA	22	-1.16533	0.278719	0.595629
REACTOME_INTEGRATION_OF_ENERGY_METABOLISM	70	-1.16379	0.213115	0.596776
HALLMARK_COMPLEMENT	171	-1.16234	0.166667	0.597403
REACTOME_RHOU_GTPASE_CYCLE	39	-1.15781	0.220459	0.607311
HALLMARK_MTORC1_SIGNALING	196	-1.153	0.164885	0.617931
REACTOME_NEUROTRANSMITTER_RELEASE_CYCLE	35	-1.15264	0.263158	0.615568
REACTOME_HYALURONAN_METABOLISM	17	-1.15256	0.290976	0.612359
REACTOME_RAC2_GTPASE_CYCLE	83	-1.15167	0.208882	0.611607
REACTOME_VISUAL_PHOTOTRANSDUCTION	53	-1.1503	0.22629	0.612284
REACTOME_GABA_RECEPTOR_ACTIVATION	40	-1.14917	0.245872	0.61206
REACTOME_METAL_ION_SLC_TRANSPORTERS	19	-1.14735	0.270609	0.614083
REACTOME_SIGNALING_BY_ERBB2	43	-1.14403	0.233898	0.620486
REACTOME_GAMMA_CARBOXYLATION_HYPUSINYLATION_HYDROXYLATION_AND_ARYLSULFATASE_ACTIVATION	51	-1.14292	0.244406	0.62032
REACTOME_SIGNALING_BY_NOTCH3	20	-1.12904	0.296703	0.658417
REACTOME_IMMUNOREGULATORY_INTERACTIONS_BETWEEN_A_LYMPHOID_AND_A_NON_LYMPHOID_CELL	83	-1.12455	0.255354	0.668669
REACTOME_NEGATIVE_REGULATION_OF_FGFR3_SIGNALING	24	-1.12432	0.294011	0.665869
REACTOME_SEMA4D_IN_SEMAPHORIN_SIGNALING	15	-1.12343	0.30315	0.664955
REACTOME_TRP_CHANNELS	22	-1.11834	0.305115	0.677033
REACTOME_GABA_B_RECEPTOR_ACTIVATION	36	-1.118	0.294011	0.67453
REACTOME_PLATELET_AGGREGATION_PLUG_FORMATION	32	-1.11653	0.307407	0.675388
REACTOME_CD28_CO_STIMULATION	33	-1.1161	0.305172	0.673037
BIOCARTA_KERATINOCYTE_PATHWAY	46	-1.11526	0.271157	0.672203
BIOCARTA_TOLL_PATHWAY	24	-1.11262	0.32363	0.676795
REACTOME_NEUREXINS_AND_NEUROLIGINS	23	-1.11071	0.29291	0.678965
BIOCARTA_NGF_PATHWAY	19	-1.1042	0.314338	0.69541
REACTOME_NUCLEAR_EVENTS_KINASE_AND_TRANSCRIPTION_FACTOR_ACTIVATION	27	-1.10245	0.341772	0.697319
REACTOME_SLC_MEDIATED_TRANSMEMBRANE_TRANSPORT	174	-1.09962	0.242236	0.702317
REACTOME_ADHERENS_JUNCTIONS_INTERACTIONS	32	-1.09738	0.318102	0.705785
REACTOME_CRMPS_IN_SEMA3A_SIGNALING	15	-1.09575	0.345811	0.707474
HALLMARK_GLYCOLYSIS	190	-1.09434	0.247664	0.708546
HALLMARK_HEDGEHOG_SIGNALING	33	-1.09424	0.299099	0.705348
HALLMARK_KRAS_SIGNALING_DN	131	-1.09275	0.266442	0.706508
REACTOME_CELL_EXTRACELLULAR_MATRIX_INTERACTIONS	17	-1.08939	0.356215	0.713607
REACTOME_RND2_GTPASE_CYCLE	42	-1.08808	0.321131	0.714205
BIOCARTA_SPRY_PATHWAY	16	-1.08779	0.352612	0.711571
BIOCARTA_CTLA4_PATHWAY	15	-1.086	0.342756	0.713508
REACTOME_GLUCAGON_TYPE_LIGAND_RECEPTORS	19	-1.08429	0.352941	0.715379
REACTOME_RET_SIGNALING	35	-1.0833	0.350694	0.715102
HALLMARK_XENOBIOTIC_METABOLISM	162	-1.08044	0.284848	0.720796
REACTOME_RHOF_GTPASE_CYCLE	40	-1.07499	0.332737	0.734717
HALLMARK_UNFOLDED_PROTEIN_RESPONSE	108	-1.07426	0.301613	0.733354
REACTOME_TRANSPORT_OF_VITAMINS_NUCLEOSIDES_AND_RELATED_MOLECULES	32	-1.07291	0.365385	0.733994
REACTOME_G_PROTEIN_BETA_GAMMA_SIGNALLING	29	-1.06894	0.357542	0.743276
BIOCARTA_NFKB_PATHWAY	21	-1.06775	0.360507	0.743307
BIOCARTA_G1_PATHWAY	25	-1.06541	0.343416	0.747088
REACTOME_RESPIRATORY_ELECTRON_TRANSPORT	86	-1.06102	0.34876	0.757736
REACTOME_NOTCH_HLH_TRANSCRIPTION_PATHWAY	22	-1.06078	0.360444	0.755074
BIOCARTA_EDG1_PATHWAY	20	-1.05736	0.390741	0.762561
REACTOME_VEGFR2_MEDIATED_VASCULAR_PERMEABILITY	29	-1.05391	0.387681	0.769963
BIOCARTA_GPCR_PATHWAY	28	-1.05322	0.388298	0.768572
REACTOME_OXIDATIVE_STRESS_INDUCED_SENESCENCE	37	-1.0458	0.409722	0.788926
REACTOME_ROS_AND_RNS_PRODUCTION_IN_PHAGOCYTES	33	-1.03886	0.380711	0.807634
REACTOME_INTEGRIN_SIGNALING	24	-1.03809	0.408503	0.806596
REACTOME_SEMAPHORIN_INTERACTIONS	51	-1.03614	0.392727	0.809507
REACTOME_INWARDLY_RECTIFYING_K_CHANNELS	29	-1.03207	0.419628	0.819075
REACTOME_CDC42_GTPASE_CYCLE	91	-1.0307	0.414791	0.820039
REACTOME_EUKARYOTIC_TRANSLATION_INITIATION	119	-1.02791	0.392628	0.825373
REACTOME_TRANSMISSION_ACROSS_CHEMICAL_SYNAPSES	147	-1.02668	0.383178	0.825721
REACTOME_PLASMA_LIPOPROTEIN_ASSEMBLY_REMODELING_AND_CLEARANCE	53	-1.02544	0.42487	0.82651
REACTOME_METABOLISM_OF_STEROIDS	85	-1.02514	0.409396	0.82393
REACTOME_SIGNAL_TRANSDUCTION_BY_L1	19	-1.02129	0.429348	0.832609
REACTOME_RHO_GTPASES_ACTIVATE_PKNS	22	-1.0186	0.421239	0.837721
REACTOME_COMPLEX_I_BIOGENESIS	50	-1.01364	0.433099	0.850407
REACTOME_ENDOSOMAL_SORTING_COMPLEX_REQUIRED_FOR_TRANSPORT_ESCRT	30	-1.01232	0.425795	0.851145
REACTOME_AGGREPHAGY	31	-1.01193	0.425641	0.848876
REACTOME_SYNTHESIS_OF_BILE_ACIDS_AND_BILE_SALTS	22	-1.0106	0.458554	0.84965
REACTOME_HS_GAG_DEGRADATION	21	-1.01026	0.445298	0.84723
REACTOME_O_LINKED_GLYCOSYLATION_OF_MUCINS	40	-1.001	0.428044	0.874272
REACTOME_PYROPTOSIS	21	-0.999385	0.459165	0.875757
REACTOME_METABOLISM_OF_NITRIC_OXIDE_NOS3_ACTIVATION_AND_REGULATION	15	-0.996707	0.461825	0.881178
BIOCARTA_AGR_PATHWAY	30	-0.994001	0.463415	0.886253
REACTOME_SENSORY_PERCEPTION	59	-0.993756	0.451115	0.883441
HALLMARK_PROTEIN_SECRETION	92	-0.993112	0.456198	0.881788
REACTOME_COSTIMULATION_BY_THE_CD28_FAMILY	61	-0.987329	0.463717	0.896691
REACTOME_NEGATIVE_REGULATION_OF_FLT3	15	-0.984772	0.477558	0.901309
REACTOME_SIGNALING_BY_INTERLEUKINS	250	-0.984523	0.494083	0.898506
REACTOME_RESPIRATORY_ELECTRON_TRANSPORT_ATP_SYNTHESIS_BY_CHEMIOSMOTIC_COUPLING_AND_HEAT_PRODUCTION_BY_UNCOUPLING_PROTEINS	106	-0.983992	0.496587	0.896663
REACTOME_DOWNREGULATION_OF_ERBB2_SIGNALING	26	-0.981351	0.488576	0.901579
REACTOME_L1CAM_INTERACTIONS	63	-0.981325	0.491039	0.898086
REACTOME_DOWNSTREAM_SIGNALING_OF_ACTIVATED_FGFR2	21	-0.97954	0.480944	0.900122
REACTOME_STIMULI_SENSING_CHANNELS	76	-0.979304	0.50444	0.89737
REACTOME_NEGATIVE_REGULATION_OF_THE_PI3K_AKT_NETWORK	92	-0.978662	0.495033	0.89584
REACTOME_RAC3_GTPASE_CYCLE	85	-0.975566	0.505068	0.902224
REACTOME_CARGO_TRAFFICKING_TO_THE_PERICILIARY_MEMBRANE	36	-0.973885	0.510166	0.904229
REACTOME_OPIOID_SIGNALLING	65	-0.972811	0.511149	0.904197
REACTOME_MUSCLE_CONTRACTION	141	-0.96824	0.539232	0.915319
REACTOME_ION_CHANNEL_TRANSPORT	140	-0.967293	0.522152	0.914866
REACTOME_PHASE_I_FUNCTIONALIZATION_OF_COMPOUNDS	67	-0.963578	0.533784	0.923255
REACTOME_INTRINSIC_PATHWAY_FOR_APOPTOSIS	39	-0.961548	0.514783	0.926102
REACTOME_PROTEIN_METHYLATION	19	-0.961505	0.522388	0.922693
REACTOME_CARBOXYTERMINAL_POST_TRANSLATIONAL_MODIFICATIONS_OF_TUBULIN	19	-0.961413	0.515094	0.919464
REACTOME_DETOXIFICATION_OF_REACTIVE_OXYGEN_SPECIES	31	-0.960734	0.504394	0.918068
REACTOME_CLATHRIN_MEDIATED_ENDOCYTOSIS	128	-0.960177	0.544049	0.916268
REACTOME_FLT3_SIGNALING	30	-0.957535	0.517921	0.920988
REACTOME_SIGNALING_BY_HEDGEHOG	132	-0.956691	0.555901	0.920181
REACTOME_CYTOKINE_SIGNALING_IN_IMMUNE_SYSTEM	410	-0.954464	0.598611	0.92367
REACTOME_RECYCLING_PATHWAY_OF_L1	32	-0.952408	0.509632	0.926414
REACTOME_CD28_DEPENDENT_PI3K_AKT_SIGNALING	22	-0.952367	0.508167	0.923109
REACTOME_SIGNALING_BY_WNT	218	-0.950067	0.59621	0.926798
REACTOME_SURFACTANT_METABOLISM	16	-0.949552	0.506375	0.924965
REACTOME_HDACS_DEACETYLATE_HISTONES	21	-0.948952	0.529623	0.923614
REACTOME_AMINE_LIGAND_BINDING_RECEPTORS	18	-0.947316	0.517495	0.925284
REACTOME_SIGNALING_BY_ACTIVIN	15	-0.94606	0.536232	0.925771
REACTOME_RAF_INDEPENDENT_MAPK1_3_ACTIVATION	22	-0.945783	0.539595	0.923168
BIOCARTA_TCR_PATHWAY	41	-0.945098	0.551261	0.922107
BIOCARTA_CALCINEURIN_PATHWAY	17	-0.944721	0.525714	0.919908
REACTOME_BIOLOGICAL_OXIDATIONS	138	-0.944466	0.5856	0.917348
REACTOME_BILE_ACID_AND_BILE_SALT_METABOLISM	26	-0.943992	0.530726	0.915484
REACTOME_GPVI_MEDIATED_ACTIVATION_CASCADE	34	-0.941913	0.570128	0.918643
REACTOME_FOXO_MEDIATED_TRANSCRIPTION	20	-0.941663	0.51197	0.916146
BIOCARTA_BAD_PATHWAY	23	-0.940874	0.532609	0.915429
BIOCARTA_INTRINSIC_PATHWAY	15	-0.94059	0.544944	0.913076
REACTOME_GLYCOSPHINGOLIPID_METABOLISM	40	-0.938558	0.560932	0.915807
HALLMARK_PANCREAS_BETA_CELLS	21	-0.93718	0.53125	0.916852
REACTOME_PROTEIN_HYDROXYLATION	17	-0.933076	0.548387	0.926011
REACTOME_RHOG_GTPASE_CYCLE	70	-0.932605	0.581633	0.924141
REACTOME_INACTIVATION_OF_CSF3_G_CSF_SIGNALING	18	-0.932011	0.549816	0.922634
REACTOME_CD209_DC_SIGN_SIGNALING	16	-0.931296	0.560229	0.921508
REACTOME_SIGNALING_BY_NTRKS	73	-0.927352	0.591264	0.930272
REACTOME_CARGO_RECOGNITION_FOR_CLATHRIN_MEDIATED_ENDOCYTOSIS	90	-0.926836	0.617406	0.928664
REACTOME_DOWNSTREAM_SIGNALING_OF_ACTIVATED_FGFR4	20	-0.924408	0.556569	0.932507
REACTOME_G_ALPHA_12_13_SIGNALLING_EVENTS	70	-0.923958	0.597039	0.930646
REACTOME_PHASE_II_CONJUGATION_OF_COMPOUNDS	66	-0.921253	0.60339	0.935355
REACTOME_RIPK1_MEDIATED_REGULATED_NECROSIS	32	-0.920759	0.543828	0.933666
REACTOME_TCF_DEPENDENT_SIGNALING_IN_RESPONSE_TO_WNT	144	-0.917451	0.644757	0.940274
REACTOME_POST_TRANSLATIONAL_MODIFICATION_SYNTHESIS_OF_GPI_ANCHORED_PROTEINS	61	-0.916405	0.611785	0.940054
BIOCARTA_NUCLEARRS_PATHWAY	20	-0.915548	0.535055	0.939443
REACTOME_GLYCOSPHINGOLIPID_CATABOLISM	30	-0.915525	0.581882	0.936394
REACTOME_TNFR2_NON_CANONICAL_NF_KB_PATHWAY	93	-0.912845	0.645057	0.940808
REACTOME_FORMATION_OF_THE_BETA_CATENIN_TCF_TRANSACTIVATING_COMPLEX	23	-0.911489	0.596396	0.941481
REACTOME_CELLULAR_SENESCENCE	91	-0.904411	0.653846	0.958035
REACTOME_REGULATION_OF_SIGNALING_BY_CBL	22	-0.902752	0.590826	0.959622
REACTOME_BETA_CATENIN_INDEPENDENT_WNT_SIGNALING	118	-0.901761	0.673203	0.959452
REACTOME_PEPTIDE_HORMONE_METABOLISM	45	-0.900907	0.615955	0.958702
BIOCARTA_ATM_PATHWAY	18	-0.896995	0.596745	0.966425
BIOCARTA_IL2_PATHWAY	22	-0.893607	0.630314	0.972805
REACTOME_PROTEIN_PROTEIN_INTERACTIONS_AT_SYNAPSES	46	-0.893367	0.656028	0.970336
REACTOME_SENESCENCE_ASSOCIATED_SECRETORY_PHENOTYPE_SASP	39	-0.892222	0.626335	0.970239
REACTOME_ACYL_CHAIN_REMODELLING_OF_PS	17	-0.890608	0.614662	0.97143
BIOCARTA_PDGF_PATHWAY	29	-0.887232	0.64841	0.977463
BIOCARTA_HIVNEF_PATHWAY	54	-0.886048	0.662791	0.977547
REACTOME_SIGNALING_BY_FGFR4	35	-0.885525	0.654412	0.975852
REACTOME_DISASSEMBLY_OF_THE_DESTRUCTION_COMPLEX_AND_RECRUITMENT_OF_AXIN_TO_THE_MEMBRANE	26	-0.884391	0.64903	0.975928
REACTOME_RAB_GERANYLGERANYLATION	57	-0.882286	0.656028	0.97837
REACTOME_GLYOXYLATE_METABOLISM_AND_GLYCINE_DEGRADATION	24	-0.881423	0.626151	0.977403
BIOCARTA_CELLCYCLE_PATHWAY	22	-0.878667	0.638989	0.981681
REACTOME_SIGNALING_BY_ERBB4	33	-0.877986	0.663121	0.980371
REACTOME_FGFR2_ALTERNATIVE_SPLICING	17	-0.874959	0.623636	0.985149
REACTOME_FCGAMMA_RECEPTOR_FCGR_DEPENDENT_PHAGOCYTOSIS	77	-0.873401	0.719864	0.986135
REACTOME_SIGNALING_BY_NUCLEAR_RECEPTORS	176	-0.863398	0.784038	1
REACTOME_SIGNALING_BY_FGFR2	55	-0.861507	0.727987	1
BIOCARTA_DEATH_PATHWAY	30	-0.860932	0.692708	1
BIOCARTA_GLEEVEC_PATHWAY	23	-0.859924	0.657845	1
REACTOME_AMINO_ACID_TRANSPORT_ACROSS_THE_PLASMA_MEMBRANE	28	-0.859413	0.691071	1
REACTOME_RHOA_GTPASE_CYCLE	138	-0.855113	0.797448	1
REACTOME_FRS_MEDIATED_FGFR2_SIGNALING	16	-0.855009	0.663424	1
REACTOME_PLATELET_HOMEOSTASIS	71	-0.854804	0.730186	1
REACTOME_RHOV_GTPASE_CYCLE	36	-0.852848	0.6843	1
REACTOME_TP53_REGULATES_TRANSCRIPTION_OF_CELL_CYCLE_GENES	33	-0.852008	0.681319	1
REACTOME_PROGRAMMED_CELL_DEATH	131	-0.851749	0.7824	1
BIOCARTA_CCR5_PATHWAY	16	-0.850199	0.677903	1
REACTOME_SIGNALING_BY_FGFR	68	-0.849356	0.750809	1
REACTOME_MRNA_SPLICING_MINOR_PATHWAY	47	-0.847886	0.72549	1
REACTOME_PROCESSING_OF_CAPPED_INTRONLESS_PRE_MRNA	28	-0.84603	0.708885	1
REACTOME_SIGNALING_BY_CSF3_G_CSF	22	-0.844983	0.670412	1
REACTOME_FRS_MEDIATED_FGFR4_SIGNALING	15	-0.843794	0.667311	1
BIOCARTA_GSK3_PATHWAY	20	-0.843374	0.68472	1
REACTOME_DDX58_IFIH1_MEDIATED_INDUCTION_OF_INTERFERON_ALPHA_BETA	33	-0.840476	0.735611	1
REACTOME_TRANSCRIPTIONAL_ACTIVITY_OF_SMAD2_SMAD3_SMAD4_HETEROTRIMER	39	-0.838203	0.724315	1
REACTOME_INTERFERON_ALPHA_BETA_SIGNALING	20	-0.837881	0.700743	1
REACTOME_PROCESSING_OF_INTRONLESS_PRE_MRNAS	20	-0.835131	0.697719	1
BIOCARTA_PML_PATHWAY	17	-0.834763	0.707635	1
HALLMARK_REACTIVE_OXIGEN_SPECIES_PATHWAY	48	-0.834442	0.719449	1
REACTOME_G_PROTEIN_MEDIATED_EVENTS	38	-0.834323	0.735294	1
REACTOME_SIGNALING_BY_TYPE_1_INSULIN_LIKE_GROWTH_FACTOR_1_RECEPTOR_IGF1R	36	-0.833628	0.717949	1
REACTOME_GAB1_SIGNALOSOME	15	-0.828305	0.721311	1
BIOCARTA_EPO_PATHWAY	19	-0.826481	0.730216	1
BIOCARTA_IGF1_PATHWAY	22	-0.823189	0.717472	1
REACTOME_FORMATION_OF_FIBRIN_CLOT_CLOTTING_CASCADE	27	-0.822061	0.737132	1
REACTOME_TP53_REGULATES_TRANSCRIPTION_OF_ADDITIONAL_CELL_CYCLE_GENES_WHOSE_EXACT_ROLE_IN_THE_P53_PATHWAY_REMAIN_UNCERTAIN	18	-0.821904	0.710575	1
REACTOME_SPHINGOLIPID_METABOLISM	72	-0.821702	0.804196	1
BIOCARTA_RACCYCD_PATHWAY	25	-0.820751	0.740484	1
REACTOME_AZATHIOPRINE_ADME	21	-0.818124	0.739927	1
HALLMARK_ANDROGEN_RESPONSE	88	-0.817116	0.825871	1
REACTOME_VXPX_CARGO_TARGETING_TO_CILIUM	18	-0.814371	0.733577	1
REACTOME_INSERTION_OF_TAIL_ANCHORED_PROTEINS_INTO_THE_ENDOPLASMIC_RETICULUM_MEMBRANE	15	-0.813192	0.703436	1
REACTOME_REGULATED_NECROSIS	53	-0.811759	0.768581	1
REACTOME_NEGATIVE_REGULATION_OF_MET_ACTIVITY	21	-0.809495	0.722522	1
REACTOME_APOPTOSIS	99	-0.808528	0.847934	1
REACTOME_SMAD2_SMAD3_SMAD4_HETEROTRIMER_REGULATES_TRANSCRIPTION	26	-0.806201	0.744863	1
BIOCARTA_INSULIN_PATHWAY	22	-0.80463	0.744802	1
REACTOME_SIGNALLING_TO_ERKS	25	-0.803983	0.765343	1
REACTOME_RHOJ_GTPASE_CYCLE	16	-0.802377	0.757396	1
REACTOME_ACTIVATION_OF_IRF3_IRF7_MEDIATED_BY_TBK1_IKBKE	18	-0.792714	0.757519	1
REACTOME_APOPTOTIC_CLEAVAGE_OF_CELLULAR_PROTEINS	35	-0.789068	0.814947	1
REACTOME_RHOQ_GTPASE_CYCLE	57	-0.787396	0.846543	1
BIOCARTA_AKT_PATHWAY	21	-0.785555	0.759924	1
REACTOME_MAPK_TARGETS_NUCLEAR_EVENTS_MEDIATED_BY_MAP_KINASES	27	-0.779516	0.785321	1
REACTOME_TRANSPORT_TO_THE_GOLGI_AND_SUBSEQUENT_MODIFICATION	165	-0.777599	0.924171	1
REACTOME_AUF1_HNRNP_D0_BINDS_AND_DESTABILIZES_MRNA	55	-0.773805	0.855721	1
REACTOME_REGULATION_OF_MRNA_STABILITY_BY_PROTEINS_THAT_BIND_AU_RICH_ELEMENTS	83	-0.770827	0.917492	1
BIOCARTA_ERK_PATHWAY	25	-0.77042	0.810409	1
REACTOME_HEDGEHOG_LIGAND_BIOGENESIS	60	-0.770359	0.842466	1
REACTOME_SYNTHESIS_OF_IP3_AND_IP4_IN_THE_CYTOSOL	26	-0.769039	0.815081	1
REACTOME_COMPLEMENT_CASCADE	35	-0.768537	0.845735	1
REACTOME_MAPK_FAMILY_SIGNALING_CASCADES	269	-0.768304	0.988218	1
REACTOME_ANTIGEN_ACTIVATES_B_CELL_RECEPTOR_BCR_LEADING_TO_GENERATION_OF_SECOND_MESSENGERS	24	-0.766258	0.798903	1
REACTOME_COPI_MEDIATED_ANTEROGRADE_TRANSPORT	90	-0.765334	0.917898	1
REACTOME_N_GLYCAN_TRIMMING_IN_THE_ER_AND_CALNEXIN_CALRETICULIN_CYCLE	16	-0.763778	0.791829	1
REACTOME_TRISTETRAPROLIN_TTP_ZFP36_BINDS_AND_DESTABILIZES_MRNA	16	-0.762554	0.786116	1
REACTOME_INSULIN_RECEPTOR_SIGNALLING_CASCADE	36	-0.761705	0.842294	1
REACTOME_HEDGEHOG_OFF_STATE	103	-0.761021	0.915584	1
REACTOME_NEUTROPHIL_DEGRANULATION	464	-0.759363	0.994652	1
REACTOME_INTRACELLULAR_SIGNALING_BY_SECOND_MESSENGERS	244	-0.759042	0.988588	1
HALLMARK_PI3K_AKT_MTOR_SIGNALING	101	-0.755012	0.934211	1
REACTOME_TP53_REGULATES_METABOLIC_GENES	70	-0.754662	0.911038	1
REACTOME_SELECTIVE_AUTOPHAGY	58	-0.753695	0.880546	1
REACTOME_RHO_GTPASES_ACTIVATE_IQGAPS	26	-0.753535	0.825	1
REACTOME_C_TYPE_LECTIN_RECEPTORS_CLRS	110	-0.752926	0.938843	1
REACTOME_NEGATIVE_REGULATION_OF_FGFR2_SIGNALING	27	-0.752442	0.844891	1
BIOCARTA_IGF1R_PATHWAY	22	-0.748418	0.828358	1
REACTOME_FCERI_MEDIATED_MAPK_ACTIVATION	30	-0.748139	0.820976	1
REACTOME_TRANS_GOLGI_NETWORK_VESICLE_BUDDING	66	-0.744621	0.91598	1
BIOCARTA_STRESS_PATHWAY	24	-0.743193	0.824176	1
BIOCARTA_BCR_PATHWAY	31	-0.739259	0.850553	1
REACTOME_PCP_CE_PATHWAY	85	-0.736485	0.919328	1
REACTOME_RHOC_GTPASE_CYCLE	69	-0.736475	0.906051	1
REACTOME_SEALING_OF_THE_NUCLEAR_ENVELOPE_NE_BY_ESCRT_III	23	-0.733868	0.835766	1
REACTOME_CHOLESTEROL_BIOSYNTHESIS	26	-0.729057	0.872495	1
REACTOME_SIGNALING_BY_NTRK1_TRKA	61	-0.727063	0.926871	1
BIOCARTA_CXCR4_PATHWAY	19	-0.72291	0.846154	1
BIOCARTA_MAPK_PATHWAY	75	-0.721144	0.946037	1
REACTOME_INOSITOL_PHOSPHATE_METABOLISM	45	-0.720558	0.894915	1
BIOCARTA_TPO_PATHWAY	25	-0.720543	0.863462	1
REACTOME_DOWNREGULATION_OF_SMAD2_3_SMAD4_TRANSCRIPTIONAL_ACTIVITY	23	-0.717123	0.869801	1
REACTOME_P75_NTR_RECEPTOR_MEDIATED_SIGNALLING	81	-0.716466	0.959016	1
REACTOME_ASYMMETRIC_LOCALIZATION_OF_PCP_PROTEINS	61	-0.715401	0.924959	1
REACTOME_GOLGI_ASSOCIATED_VESICLE_BIOGENESIS	52	-0.713123	0.918089	1
BIOCARTA_STATHMIN_PATHWAY	19	-0.701762	0.874088	1
BIOCARTA_CERAMIDE_PATHWAY	22	-0.700953	0.873626	1
REACTOME_ANTIMICROBIAL_PEPTIDES	22	-0.700295	0.905204	1
BIOCARTA_CSK_PATHWAY	16	-0.699474	0.862637	1
REACTOME_CYCLIN_D_ASSOCIATED_EVENTS_IN_G1	43	-0.695094	0.926244	1
REACTOME_CYTOSOLIC_SENSORS_OF_PATHOGEN_ASSOCIATED_DNA	32	-0.690283	0.893617	1
REACTOME_SIGNALING_BY_FGFR1	43	-0.689404	0.942379	1
BIOCARTA_EGF_PATHWAY	28	-0.68819	0.90128	1
BIOCARTA_P53_PATHWAY	15	-0.687264	0.878229	1
REACTOME_FORMATION_OF_ATP_BY_CHEMIOSMOTIC_COUPLING	15	-0.683388	0.87619	1
REACTOME_RAP1_SIGNALLING	15	-0.674942	0.867537	1
REACTOME_INTERLEUKIN_3_INTERLEUKIN_5_AND_GM_CSF_SIGNALING	38	-0.674062	0.941176	1
REACTOME_LYSOSOME_VESICLE_BIOGENESIS	30	-0.673609	0.92029	1
REACTOME_RHOB_GTPASE_CYCLE	68	-0.673047	0.975124	1
REACTOME_APOPTOTIC_FACTOR_MEDIATED_RESPONSE	17	-0.671485	0.899115	1
REACTOME_INITIAL_TRIGGERING_OF_COMPLEMENT	16	-0.665287	0.875	1
REACTOME_INTRA_GOLGI_TRAFFIC	34	-0.663725	0.960549	1
REACTOME_MAPK6_MAPK4_SIGNALING	73	-0.662942	0.976667	1
REACTOME_PI_3K_CASCADE_FGFR2	15	-0.662823	0.914286	1
BIOCARTA_MET_PATHWAY	33	-0.661075	0.94306	1
REACTOME_CELL_DEATH_SIGNALLING_VIA_NRAGE_NRIF_AND_NADE	67	-0.658839	0.977929	1
REACTOME_TRANSCRIPTIONAL_REGULATION_BY_RUNX3	78	-0.649058	0.989882	1
REACTOME_GENERATION_OF_SECOND_MESSENGER_MOLECULES	23	-0.646882	0.937956	1
BIOCARTA_PTEN_PATHWAY	16	-0.6457	0.916814	1
BIOCARTA_FCER1_PATHWAY	38	-0.643119	0.952899	1
REACTOME_MYOGENESIS	23	-0.63149	0.931284	1
REACTOME_RHOBTB2_GTPASE_CYCLE	22	-0.63014	0.947644	1
REACTOME_REGULATION_OF_PTEN_GENE_TRANSCRIPTION	42	-0.625183	0.981164	1
REACTOME_METALLOPROTEASE_DUBS	22	-0.624671	0.940878	1
REACTOME_INTRINSIC_PATHWAY_OF_FIBRIN_CLOT_FORMATION	16	-0.622844	0.92973	1
REACTOME_BUTYRATE_RESPONSE_FACTOR_1_BRF1_BINDS_AND_DESTABILIZES_MRNA	16	-0.621865	0.94499	1
REACTOME_PLATELET_SENSITIZATION_BY_LDL	16	-0.620695	0.946714	1
REACTOME_ASPARAGINE_N_LINKED_GLYCOSYLATION	246	-0.617425	0.998525	1
BIOCARTA_TFF_PATHWAY	22	-0.613662	0.959002	1
REACTOME_NEGATIVE_REGULATION_OF_MAPK_PATHWAY	43	-0.593232	0.986207	1
BIOCARTA_CREB_PATHWAY	20	-0.559586	0.970909	1
REACTOME_RUNX1_INTERACTS_WITH_CO_FACTORS_WHOSE_PRECISE_EFFECT_ON_RUNX1_TARGETS_IS_NOT_KNOWN	34	-0.552472	0.991182	1
REACTOME_IRAK1_RECRUITS_IKK_COMPLEX	15	-0.541559	0.978495	1
REACTOME_MITOPHAGY	29	-0.529738	0.99469	1
REACTOME_TRANSLATION	226	-0.519701	1	1
REACTOME_IKK_COMPLEX_RECRUITMENT_MEDIATED_BY_RIP1	24	-0.518675	0.993056	1
BIOCARTA_RAS_PATHWAY	21	-0.514003	0.987296	1
REACTOME_SPRY_REGULATION_OF_FGF_SIGNALING	17	-0.512716	0.986692	1
BIOCARTA_LONGEVITY_PATHWAY	15	-0.497992	0.986742	1
REACTOME_SIGNALING_BY_ROBO_RECEPTORS	21	-0.497276	0.992857	1
REACTOME_PINK1_PRKN_MEDIATED_MITOPHAGY	22	-0.495705	0.996282	1
REACTOME_DAP12_SIGNALING	28	-0.493462	0.998178	1
BIOCARTA_PAR1_PATHWAY	18	-0.490479	0.996528	1
BIOCARTA_ECM_PATHWAY	21	-0.453825	0.993139	1
REACTOME_RNA_POLYMERASE_II_TRANSCRIPTION_TERMINATION	61	-0.45281	0.998291	1
REACTOME_RHOBTB_GTPASE_CYCLE	34	-0.424425	1	1
REACTOME_VLDLR_INTERNALISATION_AND_DEGRADATION	16	-0.416997	1	1
REACTOME_ACTIVATION_OF_THE_MRNA_UPON_BINDING_OF_THE_CAP_BINDING_COMPLEX_AND_EIFS_AND_SUBSEQUENT_BINDING_TO_43S	60	-0.380076	1	0.999856
HALLMARK_HEME_METABOLISM	183	2.58221	0	0
REACTOME_MITOTIC_PROMETAPHASE	189	2.34294	0	0
REACTOME_CELL_CYCLE_CHECKPOINTS	270	2.23524	0	0.00151499
HALLMARK_E2F_TARGETS	199	2.23503	0	0.00113624
REACTOME_AMPLIFICATION_OF_SIGNAL_FROM_THE_KINETOCHORES	93	2.22019	0	0.00198651
REACTOME_ACTIVATION_OF_THE_PRE_REPLICATIVE_COMPLEX	31	2.20356	0	0.00221058
REACTOME_DNA_DOUBLE_STRAND_BREAK_REPAIR	147	2.19569	0	0.00203694
HALLMARK_G2M_CHECKPOINT	195	2.1943	0	0.00178232
REACTOME_DNA_REPAIR	285	2.19188	0	0.00158429
REACTOME_GLYCOLYSIS	58	2.18961	0	0.00142586
REACTOME_HOMOLOGY_DIRECTED_REPAIR	118	2.18892	0	0.00129623
REACTOME_ACTIVATION_OF_ATR_IN_RESPONSE_TO_REPLICATION_STRESS	35	2.18544	0	0.00118822
REACTOME_PROCESSING_OF_DNA_DOUBLE_STRAND_BREAK_ENDS	75	2.18296	0	0.00109681
REACTOME_GLUCOSE_METABOLISM	76	2.16715	0	0.00101847
REACTOME_MITOTIC_SPINDLE_CHECKPOINT	110	2.1495	0	0.000951
REACTOME_M_PHASE	353	2.14846	0	0.000956
REACTOME_RESOLUTION_OF_SISTER_CHROMATID_COHESION	118	2.13682	0	0.00103552
REACTOME_TRANSCRIPTIONAL_REGULATION_BY_SMALL_RNAS	32	2.109	0	0.00171266
REACTOME_NONHOMOLOGOUS_END_JOINING_NHEJ	54	2.10663	0	0.00162252
REACTOME_NUCLEAR_PORE_COMPLEX_NPC_DISASSEMBLY	31	2.07526	0.00228833	0.0025938
REACTOME_RESOLUTION_OF_D_LOOP_STRUCTURES	32	2.05602	0	0.00347306
REACTOME_SUMOYLATION_OF_UBIQUITINYLATION_PROTEINS	37	2.02477	0	0.00472818
REACTOME_G2_M_CHECKPOINTS	150	2.02039	0	0.00475772
REACTOME_CHROMOSOME_MAINTENANCE	98	1.99944	0	0.00570949
REACTOME_HDR_THROUGH_SINGLE_STRAND_ANNEALING_SSA	35	1.98551	0	0.00628571
REACTOME_HDR_THROUGH_HOMOLOGOUS_RECOMBINATION_HRR	56	1.98303	0	0.00616923
REACTOME_MITOTIC_PROPHASE	89	1.96757	0	0.00680742
REACTOME_SUMOYLATION_OF_DNA_REPLICATION_PROTEINS	41	1.9667	0	0.00660504
REACTOME_DNA_REPLICATION_PRE_INITIATION	98	1.96019	0	0.00676032
REACTOME_HOMOLOGOUS_DNA_PAIRING_AND_STRAND_EXCHANGE	26	1.95703	0	0.00676022
REACTOME_TRANSPORT_OF_THE_SLBP_DEPENDANT_MATURE_MRNA	34	1.9475	0	0.00725849
REACTOME_TRANSPORT_OF_MATURE_MRNAS_DERIVED_FROM_INTRONLESS_TRANSCRIPTS	41	1.94644	0	0.00716918
REACTOME_SEPARATION_OF_SISTER_CHROMATIDS	182	1.92263	0	0.00924534
REACTOME_AURKA_ACTIVATION_BY_TPX2	70	1.9038	0.00243309	0.0110973
REACTOME_MITOTIC_METAPHASE_AND_ANAPHASE	220	1.89014	0	0.0122608
REACTOME_METABOLISM_OF_PORPHYRINS	21	1.88678	0.00206612	0.0124476
REACTOME_SNRNP_ASSEMBLY	46	1.88157	0	0.012836
REACTOME_G2_M_DNA_DAMAGE_CHECKPOINT	78	1.87961	0	0.0127899
REACTOME_FORMATION_OF_SENESCENCE_ASSOCIATED_HETEROCHROMATIN_FOCI_SAHF	15	1.87823	0.00668151	0.0126637
REACTOME_DNA_REPLICATION	124	1.87721	0	0.0125696
REACTOME_TELOMERE_MAINTENANCE	47	1.86796	0.00238095	0.0133505
REACTOME_PYRUVATE_METABOLISM_AND_CITRIC_ACID_TCA_CYCLE	46	1.86748	0	0.0130327
REACTOME_NUCLEAR_ENVELOPE_BREAKDOWN	46	1.86381	0	0.0131981
REACTOME_GENE_SILENCING_BY_RNA	40	1.84296	0	0.015974
REACTOME_POSTMITOTIC_NUCLEAR_PORE_COMPLEX_NPC_REFORMATION	22	1.84182	0.00236967	0.0157885
REACTOME_RECRUITMENT_OF_NUMA_TO_MITOTIC_CENTROSOMES	85	1.83599	0	0.0164765
REACTOME_SUMOYLATION_OF_SUMOYLATION_PROTEINS	33	1.83104	0.00458716	0.0171101
REACTOME_DNA_DOUBLE_STRAND_BREAK_RESPONSE	64	1.8234	0	0.0180071
REACTOME_TELOMERE_C_STRAND_LAGGING_STRAND_SYNTHESIS	31	1.82182	0	0.0181345
REACTOME_MTOR_SIGNALLING	41	1.80609	0.00243309	0.020446
BIOCARTA_ATRBRCA_PATHWAY	18	1.7943	0.0063425	0.0220894
REACTOME_REGULATION_OF_PLK1_ACTIVITY_AT_G2_M_TRANSITION	85	1.77002	0.00773196	0.0270024
BIOCARTA_VDR_PATHWAY	22	1.76659	0.00416667	0.027331
REACTOME_GLYCOGEN_METABOLISM	18	1.75849	0.00890869	0.0289357
REACTOME_REGULATION_OF_TP53_ACTIVITY	149	1.74898	0	0.0306234
REACTOME_ENERGY_DEPENDENT_REGULATION_OF_MTOR_BY_LKB1_AMPK	29	1.74202	0.0045045	0.0321265
REACTOME_POLYMERASE_SWITCHING_ON_THE_C_STRAND_OF_THE_TELOMERE	24	1.73172	0.00481928	0.0345392
REACTOME_ASSEMBLY_OF_THE_PRE_REPLICATIVE_COMPLEX	83	1.72885	0	0.0348325
REACTOME_DNA_DAMAGE_TELOMERE_STRESS_INDUCED_SENESCENCE	26	1.71984	0.00729927	0.0373075
REACTOME_FANCONI_ANEMIA_PATHWAY	37	1.71706	0.00234742	0.0375903
REACTOME_CONDENSATION_OF_PROPHASE_CHROMOSOMES	34	1.71419	0.00900901	0.0380487
REACTOME_TRAFFICKING_OF_AMPA_RECEPTORS	25	1.71004	0.00485437	0.0388295
REACTOME_DNA_STRAND_ELONGATION	23	1.70811	0.00452489	0.0389509
REACTOME_CITRIC_ACID_CYCLE_TCA_CYCLE	22	1.70699	0.0151844	0.0387934
REACTOME_DEPOSITION_OF_NEW_CENPA_CONTAINING_NUCLEOSOMES_AT_THE_CENTROMERE	51	1.70333	0	0.0393675
REACTOME_RHO_GTPASES_ACTIVATE_FORMINS	131	1.69916	0	0.0402447
REACTOME_SUMOYLATION_OF_DNA_DAMAGE_RESPONSE_AND_REPAIR_PROTEINS	72	1.69913	0	0.039644
REACTOME_S_PHASE	144	1.69867	0	0.0392074
REACTOME_REGULATION_OF_TP53_ACTIVITY_THROUGH_PHOSPHORYLATION	88	1.6951	0.00263158	0.0395127
REACTOME_GLUCONEOGENESIS	32	1.68085	0.00475059	0.0442107
REACTOME_MITOTIC_G2_G2_M_PHASES	178	1.66837	0	0.0489676
REACTOME_RMTS_METHYLATE_HISTONE_ARGININES	47	1.66397	0.00249377	0.0501916
REACTOME_ACTIVATION_OF_NMDA_RECEPTORS_AND_POSTSYNAPTIC_EVENTS	31	1.65007	0.00913242	0.0561782
REACTOME_DNA_DAMAGE_BYPASS	47	1.62734	0.0045045	0.0665015
REACTOME_TRANSPORT_OF_MATURE_TRANSCRIPT_TO_CYTOPLASM	75	1.61394	0.00263852	0.0731192
REACTOME_TRAFFICKING_OF_GLUR2_CONTAINING_AMPA_RECEPTORS	15	1.59911	0.043956	0.0806342
BIOCARTA_GH_PATHWAY	26	1.59096	0.0155902	0.0851023
REACTOME_GLOBAL_GENOME_NUCLEOTIDE_EXCISION_REPAIR_GG_NER	81	1.58592	0.007109	0.0873425
REACTOME_REGULATION_OF_PYRUVATE_DEHYDROGENASE_PDH_COMPLEX	15	1.58326	0.0315126	0.0879327
REACTOME_SUMOYLATION	153	1.57623	0	0.0913449
REACTOME_LAGGING_STRAND_SYNTHESIS	19	1.57522	0.03386	0.0909151
REACTOME_ESTROGEN_DEPENDENT_GENE_EXPRESSION	72	1.56042	0.00501253	0.10033
REACTOME_SUMOYLATION_OF_CHROMATIN_ORGANIZATION_PROTEINS	60	1.5591	0.019802	0.100092
HALLMARK_BILE_ACID_METABOLISM	89	1.55892	0.0128866	0.0990811
REACTOME_TELOMERE_EXTENSION_BY_TELOMERASE	19	1.54074	0.0414847	0.112058
REACTOME_HATS_ACETYLATE_HISTONES	58	1.53423	0.016055	0.116047
REACTOME_PRC2_METHYLATES_HISTONES_AND_DNA	48	1.53238	0.021028	0.116115
HALLMARK_SPERMATOGENESIS	93	1.5288	0.0078534	0.117309
REACTOME_TERMINATION_OF_TRANSLESION_DNA_SYNTHESIS	31	1.5274	0.0205479	0.117073
HALLMARK_MITOTIC_SPINDLE	198	1.52609	0	0.116887
REACTOME_PURINE_CATABOLISM	17	1.52471	0.0554324	0.11662
REACTOME_BASE_EXCISION_REPAIR	38	1.51599	0.0305164	0.122492
REACTOME_G1_S_TRANSITION	103	1.50522	0.00249377	0.130221
REACTOME_ABC_FAMILY_PROTEINS_MEDIATED_TRANSPORT	93	1.50337	0.0104712	0.130415
REACTOME_RUNX1_REGULATES_GENES_INVOLVED_IN_MEGAKARYOCYTE_DIFFERENTIATION_AND_PLATELET_FUNCTION	53	1.49595	0.0253807	0.135724
REACTOME_UNBLOCKING_OF_NMDA_RECEPTORS_GLUTAMATE_BINDING_AND_ACTIVATION	17	1.49295	0.0544218	0.136984
REACTOME_PYRUVATE_METABOLISM	22	1.49098	0.0359712	0.137404
REACTOME_TRANSLESION_SYNTHESIS_BY_Y_FAMILY_DNA_POLYMERASES_BYPASSES_LESIONS_ON_DNA_TEMPLATE	38	1.48244	0.0206422	0.143948
REACTOME_SWITCHING_OF_ORIGINS_TO_A_POST_REPLICATIVE_STATE	90	1.48086	0.00777202	0.143928
REACTOME_ORC1_REMOVAL_FROM_CHROMATIN	69	1.47796	0.022113	0.145197
REACTOME_MITOTIC_G1_PHASE_AND_G1_S_TRANSITION	128	1.47778	0	0.143913
REACTOME_APC_C_MEDIATED_DEGRADATION_OF_CELL_CYCLE_PROTEINS	85	1.47762	0.0180412	0.142632
REACTOME_G0_AND_EARLY_G1	16	1.4745	0.0555556	0.144403
REACTOME_MTORC1_MEDIATED_SIGNALLING	24	1.45824	0.0645161	0.159019
REACTOME_ION_TRANSPORT_BY_P_TYPE_ATPASES	47	1.44136	0.0438799	0.175307
REACTOME_EPIGENETIC_REGULATION_OF_GENE_EXPRESSION	113	1.43915	0.0211082	0.176201
REACTOME_FORMATION_OF_WDR5_CONTAINING_HISTONE_MODIFYING_COMPLEXES	37	1.43661	0.04662	0.177348
REACTOME_UCH_PROTEINASES	80	1.43025	0.0269608	0.18266
BIOCARTA_EIF4_PATHWAY	21	1.42806	0.0726872	0.183277
REACTOME_PKMTS_METHYLATE_HISTONE_LYSINES	60	1.41982	0.0397022	0.191414
BIOCARTA_MTOR_PATHWAY	19	1.41807	0.0833333	0.191685
REACTOME_ACYL_CHAIN_REMODELLING_OF_PC	22	1.41764	0.0752212	0.19057
REACTOME_NUCLEOTIDE_EXCISION_REPAIR	108	1.41698	0.0190217	0.189888
REACTOME_ANCHORING_OF_THE_BASAL_BODY_TO_THE_PLASMA_MEMBRANE	95	1.41654	0.013089	0.188857
REACTOME_METABOLISM_OF_NUCLEOTIDES	87	1.40498	0.0266667	0.201465
REACTOME_SIGNALING_BY_ERYTHROPOIETIN	16	1.39857	0.0820399	0.20776
REACTOME_DEUBIQUITINATION	226	1.39815	0	0.206591
REACTOME_CHEMOKINE_RECEPTORS_BIND_CHEMOKINES	41	1.39204	0.0537383	0.21314
REACTOME_METABOLISM_OF_WATER_SOLUBLE_VITAMINS_AND_COFACTORS	107	1.39058	0.0335917	0.213421
REACTOME_CHROMATIN_MODIFYING_ENZYMES	167	1.37478	0.00849858	0.232082
REACTOME_HDMS_DEMETHYLATE_HISTONES	40	1.37478	0.0682819	0.230164
REACTOME_PEROXISOMAL_PROTEIN_IMPORT	56	1.36848	0.0588235	0.236809
REACTOME_ACTIVATION_OF_APC_C_AND_APC_C_CDC20_MEDIATED_DEGRADATION_OF_MITOTIC_PROTEINS	75	1.36493	0.0477327	0.239768
REACTOME_REGULATION_OF_TP53_ACTIVITY_THROUGH_METHYLATION	18	1.36285	0.102249	0.24079
REACTOME_KINESINS	49	1.36241	0.0577889	0.239347
REACTOME_SYNTHESIS_OF_PC	23	1.35801	0.0841346	0.244049
REACTOME_RAF_ACTIVATION	35	1.35773	0.0735632	0.242513
REACTOME_CYCLIN_A_B1_B2_ASSOCIATED_EVENTS_DURING_G2_M_TRANSITION	24	1.35713	0.0852878	0.241481
REACTOME_RECOGNITION_OF_DNA_DAMAGE_BY_PCNA_CONTAINING_REPLICATION_COMPLEX	30	1.3512	0.103297	0.247958
BIOCARTA_CCR3_PATHWAY	18	1.34893	0.113839	0.249689
REACTOME_ANTIGEN_PROCESSING_CROSS_PRESENTATION	75	1.34273	0.0565553	0.256796
REACTOME_RHO_GTPASE_EFFECTORS	235	1.33975	0.0162866	0.259331
REACTOME_REGULATION_OF_LIPID_METABOLISM_BY_PPARALPHA	16	1.33788	0.131183	0.260174
BIOCARTA_HDAC_PATHWAY	22	1.32687	0.123596	0.274833
HALLMARK_MYC_TARGETS_V2	58	1.32334	0.0668258	0.27823
REACTOME_DNA_DAMAGE_RECOGNITION_IN_GG_NER	39	1.31818	0.113744	0.284658
REACTOME_GLYCEROPHOSPHOLIPID_BIOSYNTHESIS	101	1.31001	0.056701	0.295643
REACTOME_MITOCHONDRIAL_CALCIUM_ION_TRANSPORT	17	1.30888	0.14094	0.295315
REACTOME_PARACETAMOL_ADME	19	1.3086	0.146497	0.293622
REACTOME_REGULATION_OF_APC_C_ACTIVATORS_BETWEEN_G1_S_AND_EARLY_ANAPHASE	35	1.30731	0.119734	0.293583
HALLMARK_PEROXISOME	89	1.30667	0.0592593	0.292464
REACTOME_PROCESSIVE_SYNTHESIS_ON_THE_C_STRAND_OF_THE_TELOMERE	17	1.30537	0.178261	0.292637
REACTOME_APC_C_CDH1_MEDIATED_DEGRADATION_OF_CDC20_AND_OTHER_APC_C_CDH1_TARGETED_PROTEINS_IN_LATE_MITOSIS_EARLY_G1	73	1.30243	0.0687204	0.29546
HALLMARK_FATTY_ACID_METABOLISM	143	1.3024	0.0410256	0.293462
REACTOME_SULFUR_AMINO_ACID_METABOLISM	21	1.29998	0.128151	0.295413
REACTOME_ER_PHAGOSOME_PATHWAY	21	1.29743	0.12967	0.297483
REACTOME_CLASS_I_MHC_MEDIATED_ANTIGEN_PROCESSING_PRESENTATION	332	1.28976	0.0140351	0.308067
REACTOME_RNA_POLYMERASE_III_TRANSCRIPTION_INITIATION_FROM_TYPE_1_PROMOTER	27	1.28664	0.124711	0.310959
REACTOME_RESOLUTION_OF_AP_SITES_VIA_THE_MULTIPLE_NUCLEOTIDE_PATCH_REPLACEMENT_PATHWAY	24	1.28259	0.145161	0.315543
REACTOME_ANTIGEN_PROCESSING_UBIQUITINATION_PROTEASOME_DEGRADATION	289	1.27649	0.00931677	0.323959
REACTOME_METABOLISM_OF_POLYAMINES	56	1.27627	0.0758294	0.322181
REACTOME_SUMOYLATION_OF_RNA_BINDING_PROTEINS	45	1.26359	0.125908	0.343051
BIOCARTA_MAL_PATHWAY	17	1.25847	0.17773	0.350243
REACTOME_REGULATION_OF_TP53_DEGRADATION	35	1.25791	0.146453	0.348841
REACTOME_ACYL_CHAIN_REMODELLING_OF_PE	21	1.24745	0.158129	0.366919
REACTOME_CROSS_PRESENTATION_OF_SOLUBLE_EXOGENOUS_ANTIGENS_ENDOSOMES	46	1.241	0.122222	0.377335
REACTOME_UB_SPECIFIC_PROCESSING_PROTEASES	157	1.23755	0.0714286	0.381573
REACTOME_FCERI_MEDIATED_NF_KB_ACTIVATION	77	1.23562	0.0970149	0.382847
REACTOME_THE_PHOTOTRANSDUCTION_CASCADE	18	1.235	0.174946	0.381577
REACTOME_BINDING_AND_UPTAKE_OF_LIGANDS_BY_SCAVENGER_RECEPTORS	29	1.23032	0.170022	0.388633
REACTOME_METABOLISM_OF_VITAMINS_AND_COFACTORS	149	1.22828	0.0781671	0.390499
BIOCARTA_HCMV_PATHWAY	17	1.22643	0.197753	0.392003
REACTOME_PROTEIN_LOCALIZATION	92	1.22608	0.110831	0.390329
REACTOME_ERK_MAPK_TARGETS	19	1.22478	0.195556	0.390585
REACTOME_NUCLEOTIDE_CATABOLISM	30	1.22249	0.192575	0.392701
REACTOME_TRIGLYCERIDE_METABOLISM	15	1.22075	0.208716	0.393942
BIOCARTA_CASPASE_PATHWAY	22	1.22062	0.2103	0.391899
REACTOME_CDK_MEDIATED_PHOSPHORYLATION_AND_REMOVAL_OF_CDC6	71	1.2033	0.135338	0.42758
REACTOME_STABILIZATION_OF_P53	55	1.18927	0.145631	0.456796
REACTOME_SYNTHESIS_OF_PIPS_AT_THE_EARLY_ENDOSOME_MEMBRANE	15	1.18078	0.243956	0.473156
REACTOME_TRANSCRIPTIONAL_REGULATION_BY_TP53	289	1.17919	0.0629139	0.474078
REACTOME_NEDDYLATION	219	1.17763	0.0864198	0.474968
REACTOME_MISCELLANEOUS_TRANSPORT_AND_BINDING_EVENTS	20	1.17537	0.261176	0.477586
REACTOME_RAB_REGULATION_OF_TRAFFICKING	111	1.1743	0.13881	0.47767
HALLMARK_MYC_TARGETS_V1	192	1.17403	0.115819	0.475552
REACTOME_FORMATION_OF_INCISION_COMPLEX_IN_GG_NER	43	1.173	0.184931	0.475435
REACTOME_NUCLEAR_EVENTS_MEDIATED_BY_NFE2L2	55	1.1719	0.202326	0.475585
REACTOME_MITOCHONDRIAL_TRANSLATION	88	1.17129	0.175743	0.474253
BIOCARTA_G2_PATHWAY	21	1.16651	0.239278	0.483412
REACTOME_NUCLEAR_ENVELOPE_NE_REASSEMBLY	62	1.16647	0.200483	0.480862
REACTOME_VITAMIN_B5_PANTOTHENATE_METABOLISM	15	1.16562	0.273756	0.480113
REACTOME_BRANCHED_CHAIN_AMINO_ACID_CATABOLISM	20	1.16419	0.24263	0.480854
REACTOME_DUAL_INCISION_IN_GG_NER	41	1.15365	0.219298	0.503652
REACTOME_INHIBITION_OF_THE_PROTEOLYTIC_ACTIVITY_OF_APC_C_REQUIRED_FOR_THE_ONSET_OF_ANAPHASE_BY_MITOTIC_SPINDLE_CHECKPOINT_COMPONENTS	21	1.14627	0.277899	0.518415
REACTOME_TBC_RABGAPS	33	1.14325	0.255172	0.523175
REACTOME_PHOSPHOLIPID_METABOLISM	175	1.13882	0.166667	0.531721
REACTOME_TP53_REGULATES_TRANSCRIPTION_OF_CELL_DEATH_GENES	15	1.13378	0.280624	0.542181
REACTOME_METABOLISM_OF_AMINO_ACIDS_AND_DERIVATIVES	203	1.133	0.109034	0.541172
REACTOME_REGULATION_OF_RUNX2_EXPRESSION_AND_ACTIVITY	52	1.13259	0.25	0.539376
REACTOME_PEROXISOMAL_LIPID_METABOLISM	23	1.12955	0.283224	0.544479
REACTOME_TRANSLESION_SYNTHESIS_BY_POLK	17	1.12424	0.282051	0.555028
REACTOME_CELLULAR_RESPONSE_TO_HEAT_STRESS	81	1.11871	0.236908	0.566839
REACTOME_SPHINGOLIPID_DE_NOVO_BIOSYNTHESIS	20	1.11837	0.312354	0.564663
REACTOME_KEAP1_NFE2L2_PATHWAY	77	1.11636	0.267003	0.566956
REACTOME_STRIATED_MUSCLE_CONTRACTION	34	1.11148	0.308559	0.57698
REACTOME_TRANSCRIPTION_COUPLED_NUCLEOTIDE_EXCISION_REPAIR_TC_NER	76	1.1112	0.278061	0.574902
REACTOME_UBIQUITIN_MEDIATED_DEGRADATION_OF_PHOSPHORYLATED_CDC25A	51	1.11084	0.272953	0.572864
REACTOME_POSITIVE_EPIGENETIC_REGULATION_OF_RRNA_EXPRESSION	29	1.10972	0.31068	0.572748
REACTOME_CONVERSION_FROM_APC_C_CDC20_TO_APC_C_CDH1_IN_LATE_ANAPHASE	20	1.10483	0.297968	0.582293
REACTOME_MACROAUTOPHAGY	115	1.10216	0.245283	0.586744
REACTOME_ION_HOMEOSTASIS	50	1.09899	0.296037	0.592413
REACTOME_G1_S_DNA_DAMAGE_CHECKPOINTS	64	1.08848	0.308235	0.6182
REACTOME_GOLGI_TO_ER_RETROGRADE_TRANSPORT	120	1.08782	0.247283	0.616902
BIOCARTA_WNT_PATHWAY	21	1.08516	0.31746	0.621195
REACTOME_PEPTIDE_LIGAND_BINDING_RECEPTORS	107	1.08365	0.296482	0.622521
REACTOME_FACTORS_INVOLVED_IN_MEGAKARYOCYTE_DEVELOPMENT_AND_PLATELET_PRODUCTION	115	1.08289	0.279012	0.621595
REACTOME_PROTEIN_UBIQUITINATION	67	1.08134	0.292857	0.622902
REACTOME_NUCLEAR_RECEPTOR_TRANSCRIPTION_PATHWAY	37	1.07836	0.312057	0.627921
REACTOME_PCNA_DEPENDENT_LONG_PATCH_BASE_EXCISION_REPAIR	20	1.07812	0.357778	0.625669
REACTOME_GAP_FILLING_DNA_REPAIR_SYNTHESIS_AND_LIGATION_IN_GG_NER	22	1.07647	0.344828	0.627347
REACTOME_BLOOD_GROUP_SYSTEMS_BIOSYNTHESIS	16	1.07441	0.341014	0.629669
REACTOME_NEUROTRANSMITTER_RECEPTORS_AND_POSTSYNAPTIC_SIGNAL_TRANSMISSION	97	1.07275	0.308901	0.631371
REACTOME_CARDIAC_CONDUCTION	84	1.05965	0.315104	0.66601
HALLMARK_MYOGENESIS	193	1.05905	0.289634	0.664582
REACTOME_ANTIGEN_PRESENTATION_FOLDING_ASSEMBLY_AND_PEPTIDE_LOADING_OF_CLASS_I_MHC	28	1.05668	0.35545	0.668604
REACTOME_PHOSPHORYLATION_OF_THE_APC_C	20	1.05319	0.365688	0.675329
HALLMARK_ADIPOGENESIS	200	1.0529	0.306548	0.672975
REACTOME_SYNTHESIS_OF_PIPS_AT_THE_GOLGI_MEMBRANE	16	1.05184	0.394144	0.67314
REACTOME_INTERLEUKIN_7_SIGNALING	22	1.05172	0.378132	0.670471
REACTOME_GLI3_IS_PROCESSED_TO_GLI3R_BY_THE_PROTEASOME	57	1.0469	0.349206	0.681542
REACTOME_INTERFERON_SIGNALING	118	1.04483	0.371703	0.684311
BIOCARTA_NKT_PATHWAY	22	1.04137	0.401639	0.691338
REACTOME_BETA_CATENIN_PHOSPHORYLATION_CASCADE	17	1.03545	0.388262	0.705739
BIOCARTA_FMLP_PATHWAY	31	1.03408	0.399543	0.706627
REACTOME_METABOLISM_OF_FOLATE_AND_PTERINES	16	1.03359	0.411255	0.705104
REACTOME_ISG15_ANTIVIRAL_MECHANISM	27	1.03324	0.375	0.703085
REACTOME_TRANSCRIPTIONAL_REGULATION_BY_RUNX2	63	1.02705	0.396135	0.718453
REACTOME_COPI_DEPENDENT_GOLGI_TO_ER_RETROGRADE_TRAFFIC	88	1.02447	0.424157	0.722988
REACTOME_APOPTOTIC_EXECUTION_PHASE	46	1.0223	0.422705	0.726188
REACTOME_ESR_MEDIATED_SIGNALING	134	1.02143	0.4	0.725628
REACTOME_ANTIVIRAL_MECHANISM_BY_IFN_STIMULATED_GENES	88	1.0207	0.40534	0.724808
REACTOME_POST_NMDA_RECEPTOR_ACTIVATION_EVENTS	16	1.01945	0.444206	0.72539
REACTOME_FC_EPSILON_RECEPTOR_FCERI_SIGNALING	119	1.01817	0.41791	0.72607
REACTOME_METABOLISM_OF_COFACTORS	15	1.01795	0.408714	0.723694
HALLMARK_INTERFERON_ALPHA_RESPONSE	91	1.01767	0.426434	0.721432
REACTOME_SYNAPTIC_ADHESION_LIKE_MOLECULES	16	1.01716	0.42	0.719805
REACTOME_SIALIC_ACID_METABOLISM	29	1.01638	0.426914	0.719093
REACTOME_TNF_SIGNALING	58	1.0149	0.399061	0.720529
REACTOME_DARPP_32_EVENTS	17	1.01305	0.436681	0.72306
REACTOME_PD_1_SIGNALING	16	1.00856	0.426049	0.733281
REACTOME_PKA_MEDIATED_PHOSPHORYLATION_OF_CREB	16	1.0065	0.45977	0.736259
REACTOME_FCERI_MEDIATED_CA_2_MOBILIZATION	29	1.00647	0.451327	0.733275
REACTOME_TNFR1_INDUCED_PROAPOPTOTIC_SIGNALING	23	1.00344	0.467249	0.739413
BIOCARTA_PYK2_PATHWAY	25	1.00197	0.457203	0.74079
REACTOME_INTERFERON_GAMMA_SIGNALING	18	1.00004	0.443439	0.743418
REACTOME_CELLULAR_RESPONSES_TO_STIMULI	431	0.99659	0.46124	0.750726
REACTOME_E3_UBIQUITIN_LIGASES_UBIQUITINATE_TARGET_PROTEINS	47	0.991652	0.474771	0.762712
REACTOME_DRUG_ADME	59	0.983185	0.487437	0.785049
REACTOME_RAB_GEFS_EXCHANGE_GTP_FOR_GDP_ON_RABS	86	0.979202	0.5	0.794012
REACTOME_DEGRADATION_OF_BETA_CATENIN_BY_THE_DESTRUCTION_COMPLEX	79	0.976614	0.506083	0.798549
REACTOME_CARGO_CONCENTRATION_IN_THE_ER	29	0.974914	0.474725	0.800494
REACTOME_PLATELET_CALCIUM_HOMEOSTASIS	26	0.973855	0.485714	0.800259
REACTOME_APC_CDC20_MEDIATED_DEGRADATION_OF_NEK2A	27	0.972534	0.494692	0.801047
REACTOME_MHC_CLASS_II_ANTIGEN_PRESENTATION	106	0.972476	0.533499	0.798036
REACTOME_TNFR1_INDUCED_NF_KAPPA_B_SIGNALING_PATHWAY	34	0.971737	0.498824	0.796984
REACTOME_TRANSLESION_SYNTHESIS_BY_POLH	19	0.969979	0.4946	0.79919
REACTOME_SUMOYLATION_OF_INTRACELLULAR_RECEPTORS	23	0.964434	0.516827	0.81256
HALLMARK_INTERFERON_GAMMA_RESPONSE	180	0.963265	0.54142	0.813131
REACTOME_REGULATION_OF_RUNX3_EXPRESSION_AND_ACTIVITY	54	0.952865	0.540741	0.841321
REACTOME_TRANSPORT_OF_INORGANIC_CATIONS_ANIONS_AND_AMINO_ACIDS_OLIGOPEPTIDES	81	0.952771	0.542141	0.83838
REACTOME_SYNTHESIS_OF_GLYCOSYLPHOSPHATIDYLINOSITOL_GPI	17	0.948072	0.538961	0.84951
BIOCARTA_AT1R_PATHWAY	25	0.944602	0.522678	0.856863
REACTOME_CLEC7A_DECTIN_1_SIGNALING	92	0.943724	0.567204	0.856354
REACTOME_LDL_CLEARANCE	15	0.94116	0.53277	0.860928
REACTOME_DOWNSTREAM_TCR_SIGNALING	87	0.941148	0.569892	0.857712
REACTOME_TCR_SIGNALING	105	0.939462	0.592287	0.859345
REACTOME_FATTY_ACID_METABOLISM	137	0.938859	0.561798	0.857885
REACTOME_TRANSPORT_OF_BILE_SALTS_AND_ORGANIC_ACIDS_METAL_IONS_AND_AMINE_COMPOUNDS	56	0.938293	0.566502	0.856334
REACTOME_METABOLISM_OF_CARBOHYDRATES	249	0.932735	0.714754	0.869466
REACTOME_DECTIN_1_MEDIATED_NONCANONICAL_NF_KB_SIGNALING	57	0.929055	0.604167	0.877138
REACTOME_NUCLEOTIDE_SALVAGE	22	0.925178	0.576577	0.885283
BIOCARTA_NFAT_PATHWAY	42	0.923912	0.585648	0.885848
REACTOME_SCF_SKP2_MEDIATED_DEGRADATION_OF_P27_P21	58	0.923762	0.609756	0.883081
REACTOME_SYNTHESIS_OF_PIPS_AT_THE_PLASMA_MEMBRANE	50	0.923605	0.596811	0.880332
REACTOME_METABOLISM_OF_LIPIDS	498	0.920211	0.823077	0.887029
REACTOME_DUAL_INCISION_IN_TC_NER	64	0.915662	0.656398	0.896677
REACTOME_MAP2K_AND_MAPK_ACTIVATION	36	0.913262	0.575688	0.900601
REACTOME_HSF1_DEPENDENT_TRANSACTIVATION	23	0.912797	0.584091	0.89876
REACTOME_PI_METABOLISM	75	0.910246	0.6575	0.902647
BIOCARTA_IL12_PATHWAY	18	0.907427	0.581236	0.907302
REACTOME_NRAGE_SIGNALS_DEATH_THROUGH_JNK	48	0.906823	0.614224	0.905781
REACTOME_CYCLIN_A_CDK2_ASSOCIATED_EVENTS_AT_S_PHASE_ENTRY	70	0.903378	0.652284	0.912067
BIOCARTA_MITOCHONDRIA_PATHWAY	19	0.899409	0.615385	0.919806
BIOCARTA_IGF1MTOR_PATHWAY	18	0.897594	0.596273	0.921627
BIOCARTA_IL7_PATHWAY	16	0.894054	0.617521	0.927805
REACTOME_SYNTHESIS_OF_PA	31	0.89374	0.630769	0.925437
REACTOME_THE_ROLE_OF_GTSE1_IN_G2_M_PROGRESSION_AFTER_G2_CHECKPOINT	71	0.8922	0.688406	0.92626
REACTOME_TRANSCRIPTIONAL_REGULATION_BY_E2F6	23	0.891116	0.631579	0.92608
REACTOME_PROCESSING_OF_CAPPED_INTRON_CONTAINING_PRE_MRNA	263	0.890817	0.824773	0.923657
BIOCARTA_NKCELLS_PATHWAY	17	0.888979	0.6125	0.925227
REACTOME_NETRIN_1_SIGNALING	19	0.887394	0.636364	0.92614
REACTOME_CELLULAR_RESPONSE_TO_CHEMICAL_STRESS	153	0.885823	0.779037	0.927119
BIOCARTA_HER2_PATHWAY	23	0.879885	0.64454	0.93938
REACTOME_TRANSCRIPTIONAL_REGULATION_BY_RUNX1	160	0.879013	0.836207	0.938485
REACTOME_RNA_POLYMERASE_II_PRE_TRANSCRIPTION_EVENTS	75	0.877472	0.73253	0.939168
REACTOME_ORGANELLE_BIOGENESIS_AND_MAINTENANCE	200	0.871217	0.835329	0.952243
REACTOME_ARACHIDONIC_ACID_METABOLISM	41	0.86894	0.688488	0.954624
REACTOME_ACTIVATED_TAK1_MEDIATES_P38_MAPK_ACTIVATION	24	0.864822	0.671141	0.961502
REACTOME_TOLL_LIKE_RECEPTOR_9_TLR9_CASCADE	93	0.864383	0.765306	0.959324
REACTOME_INTERLEUKIN_17_SIGNALING	58	0.863236	0.709443	0.958905
REACTOME_CA_DEPENDENT_EVENTS	26	0.862774	0.665217	0.956852
REACTOME_PKR_MEDIATED_SIGNALING	62	0.862268	0.727689	0.954975
BIOCARTA_FAS_PATHWAY	28	0.861716	0.68764	0.953252
REACTOME_REGULATION_OF_HSF1_MEDIATED_HEAT_SHOCK_RESPONSE	62	0.861571	0.745238	0.950433
REACTOME_INTRA_GOLGI_AND_RETROGRADE_GOLGI_TO_ER_TRAFFIC	174	0.85975	0.834286	0.951701
REACTOME_FATTY_ACYL_COA_BIOSYNTHESIS	26	0.859515	0.671946	0.949137
REACTOME_TRAF6_MEDIATED_INDUCTION_OF_TAK1_COMPLEX_WITHIN_TLR4_COMPLEX	17	0.859288	0.67191	0.9466
REACTOME_SYNTHESIS_OF_VERY_LONG_CHAIN_FATTY_ACYL_COAS	17	0.856247	0.678005	0.950678
REACTOME_CYTOPROTECTION_BY_HMOX1	48	0.855964	0.737209	0.948193
BIOCARTA_MPR_PATHWAY	16	0.854044	0.682018	0.949581
REACTOME_AMINO_ACIDS_REGULATE_MTORC1	52	0.851989	0.753425	0.951238
BIOCARTA_RHO_PATHWAY	20	0.851093	0.668982	0.950267
REACTOME_RNA_POLYMERASE_III_TRANSCRIPTION	34	0.842968	0.739819	0.96517
REACTOME_JNK_C_JUN_KINASES_PHOSPHORYLATION_AND_ACTIVATION_MEDIATED_BY_ACTIVATED_HUMAN_TAK1	22	0.839046	0.702929	0.970558
REACTOME_COPI_INDEPENDENT_GOLGI_TO_ER_RETROGRADE_TRAFFIC	44	0.836741	0.777506	0.972513
REACTOME_RHO_GTPASES_ACTIVATE_PAKS	22	0.836344	0.719027	0.970288
REACTOME_GLUTATHIONE_CONJUGATION	31	0.834106	0.743529	0.97202
BIOCARTA_MTA3_PATHWAY	18	0.832395	0.711364	0.972503
BIOCARTA_MEF2D_PATHWAY	15	0.830264	0.703297	0.973745
REACTOME_TRANSCRIPTIONAL_REGULATION_BY_THE_AP_2_TFAP2_FAMILY_OF_TRANSCRIPTION_FACTORS	17	0.82385	0.74359	0.984314
BIOCARTA_BARRESTIN_SRC_PATHWAY	16	0.820855	0.695852	0.987221
REACTOME_SYNTHESIS_OF_ACTIVE_UBIQUITIN_ROLES_OF_E1_AND_E2_ENZYMES	31	0.820808	0.784038	0.984257
REACTOME_ROLE_OF_PHOSPHOLIPIDS_IN_PHAGOCYTOSIS	21	0.820377	0.737307	0.982115
REACTOME_MYD88_MAL_TIRAP_CASCADE_INITIATED_ON_PLASMA_MEMBRANE	83	0.818861	0.810096	0.982082
REACTOME_CELLULAR_RESPONSE_TO_HYPOXIA	69	0.817188	0.831296	0.982242
REACTOME_NOD1_2_SIGNALING_PATHWAY	32	0.812681	0.796537	0.987907
REACTOME_DEATH_RECEPTOR_SIGNALING	136	0.811883	0.920981	0.986511
BIOCARTA_GCR_PATHWAY	15	0.811809	0.740741	0.983648
REACTOME_INTERCONVERSION_OF_NUCLEOTIDE_DI_AND_TRIPHOSPHATES	25	0.804738	0.762821	0.993743
REACTOME_REGULATION_OF_TP53_ACTIVITY_THROUGH_ACETYLATION	29	0.803547	0.775599	0.99294
BIOCARTA_MCALPAIN_PATHWAY	19	0.797013	0.785068	1
REACTOME_EFFECTS_OF_PIP2_HYDROLYSIS	23	0.795361	0.806147	1
REACTOME_RHO_GTPASES_ACTIVATE_NADPH_OXIDASES	20	0.791822	0.756152	1
REACTOME_DEGRADATION_OF_DVL	55	0.791022	0.8725	1
REACTOME_NEGATIVE_REGULATION_OF_FGFR4_SIGNALING	26	0.78519	0.795673	1
REACTOME_REGULATION_OF_NF_KAPPA_B_SIGNALING	17	0.785125	0.772009	1
REACTOME_REGULATION_OF_TNFR1_SIGNALING	49	0.775505	0.857809	1
REACTOME_DOWNSTREAM_SIGNALING_OF_ACTIVATED_FGFR1	22	0.770793	0.802632	1
BIOCARTA_RAC1_PATHWAY	21	0.769901	0.797701	1
REACTOME_INITIATION_OF_NUCLEAR_ENVELOPE_NE_REFORMATION	17	0.765042	0.79085	1
REACTOME_TAK1_DEPENDENT_IKK_AND_NF_KAPPA_B_ACTIVATION	38	0.763356	0.832558	1
REACTOME_SUMOYLATION_OF_TRANSCRIPTION_COFACTORS	38	0.76329	0.863208	1
REACTOME_TOLL_LIKE_RECEPTOR_4_TLR4_CASCADE	114	0.762903	0.949495	1
HALLMARK_DNA_REPAIR	145	0.759509	0.987277	1
REACTOME_RNA_POLYMERASE_II_PROMOTER_ESCAPE	44	0.75561	0.894009	1
REACTOME_MYD88_INDEPENDENT_TLR4_CASCADE	99	0.746895	0.955381	1
REACTOME_ER_TO_GOLGI_ANTEROGRADE_TRANSPORT	139	0.746807	0.972892	1
REACTOME_RNA_POLYMERASE_I_TRANSCRIPTION_TERMINATION	29	0.746337	0.872807	1
REACTOME_SYNTHESIS_OF_SUBSTRATES_IN_N_GLYCAN_BIOSYTHESIS	56	0.746313	0.898219	1
REACTOME_ACTIVATION_OF_NF_KAPPAB_IN_B_CELLS	64	0.745091	0.906634	1
HALLMARK_OXIDATIVE_PHOSPHORYLATION	195	0.741901	0.991279	1
REACTOME_DEGRADATION_OF_AXIN	54	0.740832	0.918519	1
REACTOME_TOLL_LIKE_RECEPTOR_CASCADES	138	0.740435	0.982609	1
BIOCARTA_ARF_PATHWAY	16	0.737375	0.825607	1
BIOCARTA_NOS1_PATHWAY	16	0.733966	0.834043	1
REACTOME_NICOTINATE_METABOLISM	29	0.733195	0.867647	1
REACTOME_WNT_LIGAND_BIOGENESIS_AND_TRAFFICKING	18	0.732528	0.861842	1
REACTOME_BIOSYNTHESIS_OF_THE_N_GLYCAN_PRECURSOR_DOLICHOL_LIPID_LINKED_OLIGOSACCHARIDE_LLO_AND_TRANSFER_TO_A_NASCENT_PROTEIN	67	0.727042	0.949875	1
REACTOME_IRS_MEDIATED_SIGNALLING	31	0.723084	0.907449	1
REACTOME_APC_C_CDC20_MEDIATED_DEGRADATION_OF_CYCLIN_B	25	0.722452	0.868817	1
REACTOME_DAP12_INTERACTIONS	49	0.72216	0.924574	1
REACTOME_MITOCHONDRIAL_FATTY_ACID_BETA_OXIDATION	32	0.714402	0.889401	1
BIOCARTA_CHEMICAL_PATHWAY	18	0.711424	0.866071	1
REACTOME_RETROGRADE_TRANSPORT_AT_THE_TRANS_GOLGI_NETWORK	44	0.70599	0.91866	1
REACTOME_FORMATION_OF_RNA_POL_II_ELONGATION_COMPLEX	54	0.702811	0.931416	1
BIOCARTA_P38MAPK_PATHWAY	32	0.701001	0.917431	1
REACTOME_INTERLEUKIN_1_FAMILY_SIGNALING	113	0.700675	0.983287	1
REACTOME_RUNX1_REGULATES_TRANSCRIPTION_OF_GENES_INVOLVED_IN_DIFFERENTIATION_OF_HSCS	65	0.692368	0.963504	1
REACTOME_RNA_POLYMERASE_II_TRANSCRIBES_SNRNA_GENES	71	0.689077	0.965432	1
REACTOME_FORMATION_OF_TC_NER_PRE_INCISION_COMPLEX	53	0.681016	0.95283	1
REACTOME_ROLE_OF_LAT2_NTAL_LAB_ON_CALCIUM_MOBILIZATION	15	0.681006	0.863636	1
REACTOME_COPII_MEDIATED_VESICLE_TRANSPORT	64	0.678219	0.98063	1
REACTOME_CLASS_I_PEROXISOMAL_MEMBRANE_PROTEIN_IMPORT	19	0.674802	0.909483	1
BIOCARTA_TEL_PATHWAY	17	0.672309	0.903297	1
REACTOME_PLASMA_LIPOPROTEIN_CLEARANCE	30	0.670874	0.943052	1
REACTOME_INTERLEUKIN_2_FAMILY_SIGNALING	29	0.667456	0.918982	1
REACTOME_INTERLEUKIN_RECEPTOR_SHC_SIGNALING	18	0.663314	0.919149	1
REACTOME_PHOSPHORYLATION_OF_CD3_AND_TCR_ZETA_CHAINS	15	0.660308	0.891775	1
REACTOME_THE_CITRIC_ACID_TCA_CYCLE_AND_RESPIRATORY_ELECTRON_TRANSPORT	152	0.659622	1	1
REACTOME_RNA_POLYMERASE_III_TRANSCRIPTION_INITIATION_FROM_TYPE_3_PROMOTER	26	0.650111	0.963134	1
REACTOME_TP53_REGULATES_TRANSCRIPTION_OF_DNA_REPAIR_GENES	43	0.646128	0.97954	1
REACTOME_RAS_PROCESSING	24	0.636766	0.940909	1
BIOCARTA_INTEGRIN_PATHWAY	33	0.635483	0.967742	1
REACTOME_DOWNSTREAM_SIGNALING_EVENTS_OF_B_CELL_RECEPTOR_BCR	78	0.635046	0.99	1
REACTOME_REGULATION_OF_PTEN_STABILITY_AND_ACTIVITY	68	0.630945	0.997525	1
REACTOME_FORMATION_OF_THE_EARLY_ELONGATION_COMPLEX	32	0.625993	0.973451	1
BIOCARTA_TNFR1_PATHWAY	28	0.625567	0.976445	1
REACTOME_NICOTINAMIDE_SALVAGING	17	0.621606	0.950893	1
REACTOME_RHOH_GTPASE_CYCLE	34	0.620222	0.97669	1
REACTOME_MITOCHONDRIAL_BIOGENESIS	26	0.615868	0.973747	1
REACTOME_RHOBTB1_GTPASE_CYCLE	22	0.613321	0.962704	1
BIOCARTA_BIOPEPTIDES_PATHWAY	26	0.600745	0.952273	1
REACTOME_PTEN_REGULATION	112	0.596229	0.997375	1
REACTOME_MRNA_CAPPING	28	0.593277	0.988399	1
REACTOME_RNA_POLYMERASE_I_TRANSCRIPTION	44	0.554411	0.995	1
REACTOME_MAJOR_PATHWAY_OF_RRNA_PROCESSING_IN_THE_NUCLEOLUS_AND_CYTOSOL	176	0.552007	1	1
REACTOME_NUCLEOTIDE_BINDING_DOMAIN_LEUCINE_RICH_REPEAT_CONTAINING_RECEPTOR_NLR_SIGNALING_PATHWAYS	46	0.549622	0.990826	1
REACTOME_REGULATION_OF_RAS_BY_GAPS	66	0.547985	0.994723	1
REACTOME_SIGNALING_BY_THE_B_CELL_RECEPTOR_BCR	103	0.539	1	1
REACTOME_DEADENYLATION_DEPENDENT_MRNA_DECAY	49	0.512926	0.992823	1
REACTOME_RHOD_GTPASE_CYCLE	50	0.473486	1	1
REACTOME_MRNA_SPLICING	198	0.472696	1	1
REACTOME_HEDGEHOG_ON_STATE	80	0.46533	1	1
REACTOME_DEADENYLATION_OF_MRNA	23	0.461871	0.995305	1
REACTOME_OVARIAN_TUMOR_DOMAIN_PROTEASES	32	0.459738	1	0.998516
